# Supplementary material for: Lipoprotein DolP supports proper folding of BamA in the bacterial outer membrane promoting fitness upon envelope stress
Source: eLife. 2021 Apr 13;10:e67817. doi: 10.7554/eLife.67817 (PMC8081527; doi:10.7554/eLife.67817)
Supplement: Figure 1—source data 1. [file elife-67817-fig1-data1.xlsx]

## Sheet: Figure 1-Source Data 1
Figure 1-Source Data 1 | Log2FC values of sgRNAs in the WT or ΔdolP screen
target	WT	ΔdolP (ΔyraP)	gene	position
ATAAGCAGAGGTAAGGCCAG	-0.4925794618032146	-0.252940284244905	uidC	1690829
TACTGCATCTTCAACCGTCT	-1.622556248918266	-1.0608957952850389	ihfB	963107
CGGTATCAAGATCGGAGGTA	-0.12610762402442588	0.14514778932134775	ybcN	572007
GTTCCGGAATATAAGAATCC	-5.170992873614309	-6.251053399076133	tufA	3468764
TGGCGAGTTGCGCGCGTGTC	-1.4075433579474157	-1.961444784988964	fimD	4543443
CGACAGTAAAGGCCATACAC	0.330465809800389	-0.1056634704932935	polB	65549
GTAGCCTTCTGCTACATTAC	0.1911665442319785	-0.07149969643604304	fruB	2261420
ATCGACCAGTGCGGCCAGAC	0.0831906146372201	-0.23472215364932336	ycbL	982941
CTTTAATCGGCTGGGTCATC	-0.4221901339118169	-0.15433824458759648	hycI	2840697
TCTTCATCGGCTTGCAGAAC	-0.6404781569155281	-0.3414535162096274	phoH	1084825
TGCCGCTCCACGGTGCAAAC	0.1250565894474489	-0.16887715049361066	yqfE	3057526
CTCGTTACGCATTCGCTCGA	0.12253722613134065	-0.06884905975636513	gspI	3460103
ACTTCTTCTTTAGTTGGTGC	-1.4445579469402712	-0.008090526259981523	mscL	3436383
ATCTGATGCAGTTCCGCAGT	0.10867297569879608	-0.07718457400802459	yjfC	4411205
AATTGCGCGCGGCAGATACC	-0.3810550046341131	-0.0195075508143292	cysZ	2529916
ATTACTTCAACCGGTTTGTT	-1.7423577709347415	-0.3801472289174518	chbB	1819427
CCATCCGGCCCGGCTTGTTT	0.14101470183011	0.047570048147433264	glpC	2353634
AGCCCCTGAGACGTTAATTC	0.26016022938065153	0.28640769555688594	rnlB	2765020
GGTTTCGATATTGTAGTTGT	-0.8149361011882741	-0.7695491941740771	hemY	3985808
GTGCTCCAGACGCGTAAACT	-0.15991086813236832	0.021704469362473944	yfbT	2409912
CTGTTTCATTGTCACTATGC	0.05440203588366321	-0.19230693131366405	yciX	1333354
CCTTTGATGAAATATAATAT	-1.4266098078856189	-0.4311742504315457	yncM	1529451
CCTTCTTCAATAACCGCGCC	0.1039169714302981	-0.41809881890896816	yghF	3110657
ACCCCAGTTTTTAAACATTC	0.05027900782822492	0.06323115163778238	bfr	3464659
TTACGTGCGGTTGGAATGCT	-0.2375759834956017	-0.03230288954239868	rcsF	219746
GGCGAGAAAATCGGGATCGT	-0.5834472118791489	-0.015810775298104485	panE	443573
TACCAACTCCCCAACTAACT	-2.3384496194658713	-2.118316478061352	xisE	1200101
TGATGACCGTCTCGGAGAGC	0.08338244962731611	0.0434363377922582	ycjQ	1373314
CCAGTAGGTGCCAATTTCAT	0.004531727475566738	0.04043402416469877	ompL	4061882
ATGCGCGTGGAACCTTGATC	-1.1387095917207706	-1.3560002474431623	metL	4128729
CTCCACGGTGACGCTGGCAC	0.9161556207471336	0.2381164587966409	dtd	4075064
CCAGATTGACGCTCAAACCT	-0.24314265937014326	-0.08402330050747442	aaeR	3387896
TTCCAGGTGGTGCAGGCTTC	-0.5061770652039369	-0.4696186565559081	ytfE	4429463
CATCGCAATACTGCCGATAC	0.209113769194802	-0.08932072019558812	adeQ	3841595
ACAGGGTTCGAGTGTGACAT	-1.6488903967317283	-2.2645955461492955	ribD	432882
TCGGCCAGATTCTGTAAAAC	-0.25642835012036835	-0.06599825387823965	cysW	2539545
TTGTAGCTGGTCGTTCAAAC	-0.390752444260096	-0.4993747106404172	nlpC	1790646
GTGGCGGCTGGCATCATATC	0.5263999689679202	0.6922695652592652	dedD	2429547
TTTTTATTTCAATTTCGCGG	-2.225440657636684	-0.14375719557053954	C0465	1970788
AATGGCAGGGGAACGTTTGC	-0.32853415060078794	-0.3608062033538654	grxB	1123039
CGCGGTAAAGGCTTTCATCC	0.3928737916513403	-0.24466671057050735	livH	3593711
CAATCCGTTTAGCGCGGGTT	0.10982207575228853	0.1267168849606033	yhhS	3609737
AATGCCGTTGAGATATTTTC	-0.10798307608850743	-0.2043954390704341	yghZ	3146611
CGCGCTAAGCGCAAACGTTC	0.6791939640314664	0.041559873841630963	hyfD	2603402
TGGTTTTCCGCGTCGCTGAT	0.2532370499452572	0.15829750612215632	ybeF	660145
CAGTCCTGGCGGCACGTACT	-0.1120991845607393	-0.6572183266508647	potD	1181946
TCCTCTGGCAATGGTTGTTC	0.09864202938962396	-0.09614786455794344	flgJ	1136892
ATTGATGCTGAAGGGTGAAC	-1.0060469799300722	-0.7697004425294975	ydcM	1502195
GCCAGCAGTTGCTGACTTTC	1.1179410362181936	0.4708370159089173	uspC	1977817
GTTTTTAGTTAAATCGATAT	-1.915337998146112	-0.4247319112414149	ratB	2752187
GATTTCAACCGCGTCGAACC	0.19998507695401413	0.021728502063199432	dgoA	3871541
CCATCGAAATGATCGGTTTC	-0.004468050603979368	-0.3882660862076266	scpB	3062300
GCTGGCGCAGAGCAGGCATC	-0.08449472316613771	0.21042604821002373	trpB	1316377
ATTTTACCTGAACCGATAAT	-1.6017976887514682	-0.26298674192248506	ydhF	1722879
AATTTTATCCAGAGCAATAC	-1.0111215368359183	0.0240957069918728	yggN	3099350
CATAGAACAGGCTACCTACC	-0.6404781569155281	-0.4545971780773328	cadA	4356155
ATAATATTTGACCAAATGTT	-5.1144093452479416	-5.558634243863188	mraY	96019
ACATACGTGGGTGATCTGTC	-0.23101245230635825	-0.10933682925523024	garP	3272324
CGTGCCGAGAATGGTGTAAT	-6.568585238433743	-5.693342262858347	ileS	23254
AAGAATCAATTTACCGTAAT	-1.070015225889487	0.07063315298494555	waaY	3798831
GGGTCTTTAGGCGGAATAAA	-4.755955374335463	-4.272013017711778	ydjJ	1856707
GACAGGTTTTAATATTGAGC	-0.35025892175550394	-0.6861624313726191	ycgN	1228206
AGAAACCTGCAACTGGGTCT	-6.377443751081734	-7.299493754133885	gyrA	2336475
GAAACCGGGAAACGTTCGCC	-1.5913053149338263	-1.6402860496547005	ubiD	4023642
ATGCTGCCGCGAAAGTTGCG	0.24933892533404897	0.30319868284554663	rpiB	4311648
TCTCCCACGGAAAGCACATC	-1.4960882475803532	-1.9818572688788956	fimI	4542061
GGGCTGGAGTTCTTAATGCT	0.93154528809813	0.14025901144262698	uidB	1691783
ATTAATGGCCAGTCAAGTAC	-0.4116594664196471	0.0350192171220125	casB	2880281
CAGCCCACTCTCCCCTGTGT	-1.1384086645427167	-1.562215244872452	yahM	344744
ACCACCACAATGGTTAATTT	0.2558817712008208	-0.06633799132026408	phoQ	1188486
GCCGGAAAGAGTAATAGAAC	-0.007581179130670134	-0.034307540880826215	gltS	3826300
AAAACCGGGCGTTGAGGCAT	-0.2349249069800736	-0.13065716846623687	flgF	1133105
AGATTCGATAGATGCCGGGT	-5.640478156915528	-4.88833968934227	fabG	1150075
AGTAAATGTGCCAGGCGTTC	-0.2889463489832681	0.26017494336083313	gatY	2175081
CCCACACCAATTCCTTGCCA	0.5562469038704996	0.3166358749717573	elaB	2378809
TAGCTCATTCCCAGCGCTAC	-4.055515656194372	-3.9709801471357657	hemH	497562
CGTCAGAGTCTGAAGAATGT	0.006260541392318021	-0.11499567798854192	yjbG	4235618
ATACGATCCGACAGTTCAAT	-0.272953195588055	-0.10617649775534332	creA	4633803
CGTTTTGTCGGTAAATACGC	-1.4208001202761162	-1.8505492492735012	nuoG	2397577
TCACAATAGTATTGGGGATC	0.07572887708388087	-0.06061138029330671	yfhL	2697847
ACTACGATCCACTTTGGCAG	0.25260663916796	0.2713924073224569	gatB	2172419
TTCTAGTCGGTGAGGTGTGG	0.05814112560119523	-0.010994957476488931	flhB	1964181
GTTCGCTGTTCACCAGTTCC	-0.4867633826544746	-0.4956888940844169	gcvH	3047305
AACGGCGTGGTGAGCGAGTC	0.01925211220760037	-0.3992577507033797	yfaQ	2327666
TTTGTCCTGCCAGCTTTCAC	0.02391881130003304	-0.559500467270111	phoP	1189429
CCCTTTATGGCAATCAATAC	-0.8664818318043549	-0.42645659171087613	napC	2295746
CCTTCTTCTTTCAGTACGGT	-1.2075187496394222	-0.6196675877717309	ygiN	3171249
CAGCTTTTTCACCAGACATT	-0.3984033697173802	-1.206809006773066	purC	2595408
ATCCCCGAACCACCTGCTTC	0.2320609339022133	0.1821571770749255	clcA	175411
GCAGGCCAGCAGATCGGCCC	0.7285181916286129	0.2409949806357983	mmuM	276418
CATGCTGCTCTCCGGGCGAC	-1.7568573406298569	-1.5261303288095192	kdsD	3339677
GAGGCCAGCGCGTTAGCGAC	0.4306686900486105	0.09748823009371677	lldP	3775603
TGATTCGTGGAGTCAATCAC	-0.5613186193963982	-0.31929958857467644	birA	4171358
TATTTATATTTGTCTGAATT	-2.4034389596146792	0.09408726052238704	IS128	2651604
TTGCAGAGACGCCCCAGAAG	-3.1884099266917167	-2.9470824346628928	atpI	3920362
TTCCTGGGTCCAGCGTTCCA	1.0300171579575677	0.8664595070803363	fimE	4540305
AAGTGAGTAGGACTGATACG	-0.6288152393899479	-0.5821813991366671	napB	2296446
AATGTAATCAAGCAATGTTC	-0.8082485662188951	-0.2476002786982993	ynaE	1432136
CCCTGCGTACAACCATGTTC	0.025301871413955238	-0.10433275772262474	glnE	3197120
CGTCATCGGCGCGGCATAGA	-0.0671974612420072	-0.32989072831973565	ugpE	3587929
GCTTATTAACAGTCAGTCTC	-0.3830903142228764	-0.2133816606965524	sibC	3054899
TTGGCCAGAGCAAGCACACA	0.2142446128277351	-0.18690944933536105	yiiR	4110488
CATGGTATTCAGAGCCAATT	-0.5960840375570747	-0.7754825423073874	dgkA	4254903
CCAGATTGCCAGACCATCGC	0.8835895642793161	-0.0912731602213297	yhhW	3577064
CCGACTGGAAGGACAAGAAG	0.038460492014641856	-0.4393786872058165	yjgZ	4499299
GCTGTCCTGGTTATGCATCG	-3.4780476920201404	-3.822798403114847	phoU	3905477
TTGCCCATAAACGAGAATAC	-0.5821985113021249	-1.2471951134504349	mnmG	3922981
GGATTCTGGGTAAGCTGCGC	-0.3550759380532797	-0.38904826134874015	yfdF	2461063
CCCAACCTTTACGGCAGAAA	-1.9941151115302287	-1.7464475169847318	fimF	4546007
CGACCTTCGGCGTGAGCTTC	0.2581448227093899	-0.19629432178491835	eutR	2553142
ACGCAGATGCCAGCCACACC	-5.5086882843599865	-6.439469763563341	lptE	671357
CAAATAAGAGACGCGGTTTC	-0.6881445905458423	-0.6287981682636363	glgB	3570883
TTTAATGACGATGGTATTAC	-1.0782357326944554	-0.4755105777898572	aldA	1486762
CATCCGGACAGATCTGTAAA	-0.3474947590688775	-0.060811740690946976	nfsA	890662
ATACGGCTGACGTCATCAAC	1.0568968865927324	1.3714258032138709	rpoS	2864958
CCATCCTGGGCAACAATAAT	-0.05923874223708948	-0.15653580029184244	rlpA	663909
CGTATCGTCGTCAGGAATGC	-3.7083208026965804	-3.5822679003669227	iraP	400798
ATATCGTCCACCCAGGTGTT	-1.2929102408700663	-1.0800751534312356	uidA	1693555
ATACCGCTGGAGAGCGAATC	-3.9688040230010415	-3.26842868036274	yfaZ	2361934
TAACAAAAGGTCGTGGTTCC	-1.3100884832799695	-1.0882782718882809	pgpB	1337654
CGCGTCGTAACTCCCCTGCC	-6.492920968501671	-5.4683040289589835	lptG	4485466
CTGCCGCAAGTGCGACTAAC	0.4615427800249807	0.0082458978745108	ygbN	2863231
AAATTTCATCTCTGAATTCA	-1.7731159254936473	-0.19839512061999687	micA	2812851
TTTCCCAGAAGAAGAAGAAC	-2.307054423190336	-2.1996045221837277	nuoM	2390650
GCGCGTCAGCTGCGCTTGTA	-0.19705175058835311	-0.22159047397208487	yqiC	3182969
GACGATGAGCGGACCGATGC	-0.7138243064855795	-0.8244119382985915	atoD	2321645
TAACTGCTCAATTTCGGTAC	-0.5485556674744889	0.04327877306939598	yiaG	3717602
GTTGCCGGGTGCCTTCGTCG	0.02169897143316657	-0.21930431475471224	sgbU	3747624
CTTCCGTGGTGGTGGTCAGT	-1.3489911755923023	-1.2810581573147857	trxB	931145
AAAACGATAAATAACGTATT	-0.4340272794481019	-0.1381572709769877	rcsA	2022218
TGCTGGCCTGGCCGTTGGTT	0.5226255786707703	-0.0012575748139311838	qseB	3168201
GCCGGTGGTCACGGTGTAAC	0.5266040947579591	0.12407642548328535	malF	4242338
CAGGTGGGACCACCGCGCTA	-1.907958467780514	-2.297398336131692	rrfC	3944734
CACCAGTGCGGCAACCGAAC	0.3088477050133869	-0.16558093989484926	fixC	44227
GAAGGCGACGTGCCGATAGT	0.022486855806901133	0.07733002197997685	ydhK	1721062
GTGCGCGGCTCATGTTTTCC	0.3899724256057262	-0.15065269836746475	yqeF	2983270
ATTCAGCACCGGGGTTCGCC	-2.4478330789731317	-3.0051133850759597	pth	1257710
GACATAATCGATATTCGGAT	-2.7623192798503258	-4.355469248804301	bamD	2734470
AATATCCGACGGGCTCATAG	-0.7701134373321237	0.13354023222367606	yehA	2186243
TAATCTTCAAGGCTAATTGT	-2.4929209685016707	-2.7460710308028213	waaP	3803619
CGGCATCGGCATCGGGTTAT	-0.002947605390218433	-0.3365532699064887	yoaE	1898804
TTTCGAGTGTGTTGAGATCC	-0.6365631069121449	-0.3579448200302125	yciT	1342263
TTTTTGCGCCAGCCAGTTTC	-1.2849975023171394	-0.5034401313042407	malK	4245104
GCTGGCAAGATGAATATCGT	0.3576804962603044	0.2165311435873212	mdtP	4298917
ACCGGGCAGGGTGGGGAGAG	-1.2442772996495397	-0.8907507834420137	glnD	188616
CCTGTCAGTACGAGTACTCT	0.1727533314787455	-0.04281422049761674	cobB	1178864
GGTTTGGTGTTCATTTGTCT	-0.17020559117136602	-0.23130356869381466	arpA	4220455
CCCTGCCACGTATGCGTCAT	0.32074191568828936	0.0901935609020872	emrA	2809604
ATCATCCGTACAACCGTTAC	-4.316043206417592	-4.878234637804738	mreC	3397414
TGAATGCCAGCCACGACGTC	0.34833416245201354	0.07924978791559845	acpH	424034
ATACGTGTAGCGTTCACTGC	-0.05849951463319347	-0.21858049152242576	yfjQ	2766806
CGATAATTAGGATACTTATC	-0.0039853555542901375	-0.16728885658871684	ygeQ	2996694
GCCAAGTTTTTGCCCGAGAT	0.5294468445267841	0.29027511421094365	yidB	3875259
CGTATCGGTATGTCCCAGAC	-0.5438021375038543	-0.5309313150733401	rbsD	3931421
CATCTCCGAAACCCCAAGCA	0.014873671697026138	0.08102791802583331	deoR	881869
CATTATCTGCCGCGATAGTC	0.4196586989886724	0.2307235629792075	menB	2374413
ACCAGTTCGCCATCCAGTAC	0.3009696607293588	0.21269800937387684	azoR	1480737
TTGTCGGGAGATGTGAAACT	-0.33590362877843394	-0.4679097403970952	allS	531078
CCATTTCATTGACAGCGTAC	0.22201831933453686	-0.13978872545468926	mdtJ	1671473
CGCGGGCCAAGTTGCGTGTT	0.5225931734857221	-0.1990962625198881	yaiX	380160
ACACAGTGCAGCGTATTTTT	-1.5601903679578926	-1.5370849231853956	pgk	3070265
TCTGATTCAGAGAACAGGGT	-0.6280944324596959	-0.5849938153330078	ldhA	1440291
ACTTCATCAACGCAATAAAA	-0.7335875613070098	0.08050339700900723	cbrC	3896178
GCTCCTGCATCGTGGTGGAC	1.1692018180883197	0.6182165261218704	fliT	2003902
TCATTTTTGATTGGCGGGTT	-0.6445825552482649	-0.2263241304487048	ppiA	3490040
CGCGATTGGGCGTCCGTCTC	0.2372660930334738	-0.2601122037343926	yagF	282649
GGTATTCTTCTCCTGGAGAT	-0.7633349047010619	-0.1630373662337976	yqiI	3188870
GATTACGAAGCGTGGGGCAC	-0.4705531554732156	-0.2742577591649372	acrR	485594
TTTCAACAGGCACCGGACGC	-0.8373354861448388	-0.6223478668038123	nanE	3368729
GATGGGCGGAAAAAAATTAG	-0.2931569045997682	-0.08047772231375216	yegL	2150911
CAAATTATACAATTTCGCCA	0.00810044310159963	-0.007580572696653131	mlaB	3335028
AAATGGTAGAGATCTGATTC	-0.7647362598776737	-0.29724130240250657	ybjD	915838
ACCTGCGCGTTCACGCAAGG	-0.3932474293057669	-0.2948022799229835	glpG	3559213
GTTATCACGAGACATATCAC	0.34303372029590284	0.25138429411785035	nanC	4537097
TGTTCTCGTCGCGGAATTCC	-1.2876890983234053	-1.147149332301765	pfkA	4105797
GATATCGCCGGAGGTTTCTC	-7.670225500309581	-7.133815723791759	lpxB	203386
AGAAACCAGGATTCGGCAAC	-0.5621836309387843	-0.1895508575198055	yqeF	2982554
TCGGAAACAGTGCTGATCCC	0.3898407772312027	-0.08085460020069035	eda	1930441
TTCTCAAGTAAGGTGCTCAT	-0.2954664489151243	0.2717011967418605	mpl	4453917
TCAGATTTGGCAGATTGAGC	-1.2427472379504034	-0.6405206532881776	deoB	4617773
GGCATCGTATCGTGGTGATT	0.3824705681565668	0.2881903902805925	alpA	2756761
TGTGCGCATGTCCATCTGGT	-6.0950440203810095	-7.1029547600869964	lptF	4484978
GTCGCGATGGCAGTAGGCCC	-0.7245585955058839	-1.1565358002918422	idnT	4490074
GTGCTTTCAGGTTCTCCGCG	0.023871798834337987	-0.22818384140040335	ryhB	3579022
GATCCAACCTGCGGCTAACG	-0.018040950775709108	-0.11994816638307393	mdtI	1670947
TTCAGCCTCTACAGTGACTT	-0.07721072729369105	-0.19801243626800147	gspB	3451762
CCAACAACCTCATATAAATC	-0.4705531554732156	-1.281746047850348	ygeL	2993033
GACATAAACGCCAGATTGAT	-0.0902810743550484	0.10927035479200486	psuK	2257089
CTCAGTAGCGTTCCTTCACT	-0.14862506058585345	-1.0179069293390686	yddM	1550739
CAAGTCGCAACGCTCCCAAA	0.012388408307431709	-0.3151030033943848	ypeA	2550111
AGTTGCCCGGTCGGGTTATT	0.08441460495010311	-0.20577931931169147	hisC	2090885
TTCAACCTGCTCGGCAAAGT	-6.025142007150853	-5.970744393390509	accC	3404205
GTGGACGGTTCATCAGCTGT	0.4426704016912113	0.16759740781181254	ybjC	890352
GGTAACGCAGTGGGCATGGT	-0.2597860592563951	-0.4337840653453371	yafW	263020
CTCCGCAAAAGAGGCGGTGT	0.4469846843348111	-0.15171878399406658	folC	2430651
CCGGTGCCAACAGGAAGAAC	0.18288908313070704	-0.08918053249007774	kup	3930164
TACCGCACGACGAACGGCAA	-3.5115804237332715	-2.466080170723372	purA	4403648
ACCATCGCGACAACCGGTTT	0.1036829386548821	-0.20490688991803951	menB	2374484
ATGGTGTATACACCAGTAAT	-2.5530153156651885	-1.1996045221837284	cyaA	3989456
GATACGAGCGATGCGATTAG	-0.852886489679354	-0.921157737360914	trkA	3434815
ATCCGTAAGCCAGAAATGCT	0.4680462998626409	0.1978137722878972	yegJ	2149427
TGTCTATCCACACCGGGCCT	-0.08427464917579575	-0.18212121048631516	ilvB	3850319
CCTTCGTCAAAAGTATCGAC	0.2874740542208201	0.026445353975916408	ryjB	4526049
TCAAGGGCGAGAATTTTCTC	0.21750283821204408	-0.2659470170124243	astD	1827050
CTGGCGCGATACGGCAGATC	-0.3485626310946055	-0.3466998887304833	nudL	1894555
TGCGCGGTAAGAATAATTAC	-0.1918371274071522	-0.26163880067791223	glrR	2686588
TTCACGAGCTGCGTGGTATT	-0.4315590238573523	-0.19306167631695612	greA	3326598
AGGTTCCCAGCACTGCCATT	0.07627421636116916	0.005872351033301637	ybdN	635467
GAAATCCGCATCAGACGTAC	0.1500332549786616	-0.07494826579558056	guaC	113752
CCCGGTATAAAGCTTATTGT	0.16955089944040158	0.08509797108625716	yhbQ	3298023
TATTTTGCTTTGCCAGTTGT	-1.244993455058085	-0.1873418470730168	ydbL	1444099
AGAAACCGGCTGTAAAGTAC	-1.1486250605858537	-0.9581222418898344	metL	4128667
TCGGTGCGTGGTTATTTCTC	-0.3073228066049116	-0.3128876386751428	tdcB	3263383
CAGGAGCGGCTCACCGGTCC	0.7084792767593022	-0.012969206073966344	gspH	3459915
GTAGCACCAAAAGCAGTTAC	0.12167734571197975	0.22062181531591207	fliC	2001072
CCTCATTGCGACCGGAGGAC	-0.6237994157688976	-0.4793569283497122	clpA	922772
GGTTTGCGCCTGCGCCAGAT	0.5850391704901017	0.3941916523650053	fliD	2002195
AATACGGAAAATCACAAACC	-0.6310178276664619	-0.29274018389015355	pgpA	436157
TCAGTGGCAGGCTGGGATTC	0.07894466459313687	0.0058790590431907494	yiiQ	4110070
CACAAACTCTTTTCCGGAAC	0.18996037825511736	0.2781840648487013	yeaX	1884588
CTGACTCGGATATTAAAACC	0.14672706552066894	0.018693233010397048	lit	1198048
TCGCTGATTTCCGGGTTCTC	0.08631703821858716	-0.11251969614343538	fdoH	4080059
GGATTGCTGATACTACTCAC	-0.22152560763330095	-0.4214329501428256	yjfI	4408328
CGCCTCATGGATCAACTGCT	0.8320096145472156	0.097658118048074	yaaA	6365
TGGTGGGTAGATAGTGACGC	-0.1064995849131769	-0.014215260244131668	ung	2714874
ATCCAGGCAAACGCAACGAT	-0.3089640131989675	-0.4473151966085405	galS	2239233
AGCAAGTTTTCCGGCCTTCT	0.1340381519968732	-0.039684914554949165	ynaA	1424831
ACTTTCGTACAGGGCAATGG	-0.2349249069800736	-0.3164585570331303	rimI	4606537
TCAATCTGGCGCAGGATTTT	0.2075187496394217	-0.061287485144025926	yhjH	3676856
GATCGCTGGAGTGCCCCGAC	-1.2106860287181052	-1.3943996303907302	argE	4152295
AATTATTATGATGAGTTACA	-1.3450222733893569	0.16539229459551996	arcZ	3348626
ACGAATATCGCGCATGGAGC	-0.0299805640872346	-0.18142697583355305	mdtK	1742125
AAATAAATTGACGGCGGCAT	-2.2360879018361928	-0.14033857276404116	yqcG	2903686
AACGACCGACGGATCGCGAC	-0.05551565619437193	-0.00999372628748052	ydcR	1508323
AAAACCTTTTTCGACATAAT	-1.1028213709727288	-0.07483798186126532	lsrF	1604735
ACTTCATCCTGAAGTGTCCC	-0.38648889068474135	-0.10645056885553328	csrB	2922360
TCGTAGAAGAAGGTCAGTTC	-3.0819878675555628	-2.7117509576189462	rbfA	3310921
ATTAACTGCATCACCTGTTC	-0.7578351075536868	0.06802445772731547	hypD	2850186
ATATCAACCAATGGTTTACC	-6.377443751081734	-6.146482135627919	kdsB	970124
GTGGTACAGGCGAAGAATAC	-1.8152013268606615	-2.0660452663439357	rydC	1489514
GTCAGGATCAGGCAGTCATC	-0.7623192798503257	-0.9158692074865032	hcp	911768
GATATGGGAAGCGAGAGAGC	-0.015987292007734633	-0.20657648279143792	gstA	1712427
CTTCGCCTCATCAATCAAAC	-0.3401565182175408	-0.5840027491122043	ssnA	3017713
GTCGCCGGGTTTTTTATGCC	-2.6770040329406424	-2.096414807854272	sucB	760810
CAGATCGATGTGGCTGACGG	-0.21974505197268124	-0.7881972404475219	yjfK	4409492
GAGTGTGCTCGCTGCTGAAC	0.2875582475645391	0.20292435109212106	flgJ	1136774
GCGTTAATCAGAATCGCTCC	0.3811958859428417	0.05012175220507409	pdxB	2435276
CCCGCAATGGAAATTTGTTC	-0.3940550179991724	-0.480292792581397	idnR	4488361
ACTCTTGTGTTGGTGCGCAC	-1.8604996737892288	-0.7285426459090854	ydfN	1633255
CCGTGCCTGGGTCGCCTGTG	0.3801240956351339	-0.012622169407029649	dhaL	1248706
GAAAAACAGCGACTGATAAT	-1.0136954804997451	-0.19393577209703627	pqqL	1572202
GGAAGGTAGCTGCTCACCAA	0.00861468122534359	-0.3491808782342383	pspC	1367264
TGAATGCCCATGCGTGATAC	-0.1904452362804806	-0.17817947963620395	yeaW	1883016
GTCAATCAGCGCGCAGCGTT	-1.4943998974275834	-1.3906947167282473	phnG	4319442
AATACCAGCCACTGGCTGTC	-0.2659354358647438	0.2642456815218053	yidR	3867236
AATATTCGGCGTAATCTTCC	-4.862870578251976	-5.697104181654545	fldA	710416
TCCCGGCGCGTCGAATAATC	0.10027901641305204	0.19226800058691484	dsbD	4363007
TTTTTACCAGGACGTAAGAG	-1.4357877373125392	-0.5088375442227236	yphB	2672617
CAGTTCTTCGAGATAGCGTC	0.5656670324395376	0.6195681877813222	cpsB	2121913
CTCAACCACCACCATATCGT	0.8486757898131911	-0.05737009598026499	sgbE	3748267
CCACCATAAAGCCGACAGTC	-0.05761412207836991	-0.15223566285821674	plaP	2084811
TACTCGCAAAGATATCTAGA	-1.2344857972396914	-0.4803242372047324	ymfD	1196677
CTGGAAGTCGACGATACCGT	-0.2802219433690664	-0.5678211647095788	fdoH	4080415
TAGCATCTGACCTACTAGAT	-0.3723727615343125	-0.11555865606691428	Control	Control
CAAAATCATACGGCCATCTT	-0.0010678721719956652	-0.10280381635405267	ygdR	2969376
ACGCTCCTGTGGTGTGATAC	0.1783724039799055	0.07632045687692668	rimK	891858
ATCATCCAGAGCCAGCAGGT	-0.08760928590422523	0.1963715992929551	sfmF	562843
GTGTTTTTCAGGCTTTGATT	-0.10044152707588827	0.08997965955865239	yhiN	3634608
AGACATTCAGAAATGAATGA	-0.6149430648083907	-0.2396314160553048	micF	2311133
TTCATAGCCAAAATTTTTGG	-0.5908473891909275	0.12761895196359485	yhaL	3253133
CGGTTGCTGGTCGAAAGTTC	-0.2226256420296302	-0.21447056937598385	ydiJ	1766277
CCAGCCGTTGTTGCTGGATC	0.4817501024954878	-0.08140855339378106	yqjK	3248147
ACAGACAGGCGCCGTTATAC	-7.377443751081734	-5.425024636217745	plsX	1147705
GCCACGATGCTTTCAAACGT	0.4799781682624846	-0.009463469903347788	yidI	3854550
ATCCATCAATACCCAGGACC	-4.152377195446961	-3.8796955949330174	dacD	2080462
ACCAGTTCGAATTGCCTGTT	0.1461182049752785	-0.4803485395241474	yaeI	184604
ATTTTGTCGCCGTTGAGAAT	-0.4395262598525914	0.03640585387544215	yidE	3863621
TGCAACAGGGGCATCAGCTC	-0.7374920157629259	-0.7425883615415394	dhaK	1249952
ATCAGCAAAGCGTTGCAAAA	-0.3710174819223012	-0.531889598098204	fucK	2935648
TTTGCAGGTCAATCCGGTCT	-0.30705442319033616	-0.024085504268192448	panZ	3596046
CAGATCAAAGCCTGCTTTCT	-0.005260885414676064	0.20694249129842698	fixA	42726
GAATCGCAAACACCAGTTTC	-0.37101748192230144	-0.29949375413388546	nrdD	4459700
GTCGGTAAAGGCTTTGGTGT	0.9514037577454186	0.1865381034670688	efeO	1081921
TACCGGGTGATGGCGCATCC	-1.363637951556704	-1.107292281271993	ygbK	2860773
GCTATCAATGCCACTCATTC	0.2630534266030757	0.32472462710798805	yeeZ	2087031
TTTCCCTGCGCCGGAATGAC	-0.152938053456936	-2.382670623314107	ftsE	3600667
AGACTCAAGGGTGCCTGCAA	-1.2360879018361928	-0.5542260560067895	citD	649984
AACGGGCCAGCGCCCTCTCC	0.025555954452945784	0.0717951361989797	uidR	1694876
GGTGATTTCGGGCAACGCAT	0.3406852010716164	-0.2959388569572589	rlmA	1904771
AGTGTTCGCCACGGCTTAAC	0.32235061028684786	0.12253681563372255	yghD	3109098
CTTTATCGCTGGCAACATAC	-0.22785175173642824	-0.23670614897582554	yihQ	4066292
GCAGTGCATCGCGCAGTTTC	0.19171507141538946	-0.161562617366675	pka	2718944
CGCTTTCCAGCACATCGCGC	0.25357209291956595	0.14792288961528174	yehY	2215734
ATCCGGTGCCAGTGAACAAC	0.3306669804122868	0.2736571726928876	cusC	594870
CAGCATGTCGCAGCCGGAAC	0.407768287938532	-0.12253328677998444	yahE	335931
ATCTTGCGGCCCCAGCGGTG	-0.5724327694924294	-0.44059974582758205	folK	157602
TGTGCCAGGGAGACAGCATC	-2.8068365433376483	-2.983386897975244	prmC	1265744
AACTCCGCGACAATAGACTT	-2.491614771001045	-2.0232692694283783	ybgC	774348
GATACGCTGAGTCGGGTCAT	-0.0403132495507017	0.02162848705638853	yicJ	3833537
TGCACCATGTGCGAAATACT	0.2926439802661702	-0.08097448702941545	ychH	1258130
GAAGCTGATGTTTGCCATAC	0.7848795276272396	0.10802607528854537	narK	1277626
CAAATTGCGCCAAAAGTGCT	0.4554462630830072	0.22110172718180765	zwf	1933975
AGGCCTGCGCCAGACCGTCC	0.19570944734978848	-0.08328681826120378	rffH	3971877
GGTGTCACGACCATATGAAC	-7.492920968501671	-5.761397858450702	serS	939463
GAAAAGGCGATCAATATCGT	0.06860565563481535	0.09534479706726362	bdcA	4471787
GATTTCGGCGGCGCGAATTG	0.0440200173565426	-0.26713263141216503	nfo	2248912
GGCTCCACGGAATATTTCAC	0.5112994978165248	0.538912673540769	ldtE	1756041
ACAATCGCGGCGATATCCAC	-4.705769617167247	-4.636528741411456	arsB	3647499
ACCTCACAGTACACCTTCAC	-0.03597546979872668	-0.1026345951890134	rrlH	226966
GATACGAACTTTGTAGTTAC	0.2431426593701433	0.02250290827996904	yaiU	392544
CGAAAGGCCATTTTCTTATC	0.2075187496394217	-0.12489017367537705	yadD	147224
TAAGGTAATCAATGTACGAA	-1.3686735414540019	-0.13592552061655616	ygjV	3239582
ATTGCCAGAATCGGTACACT	0.17950437346982515	0.1989448543065464	fucO	2930645
GACCTTCCAGCAGAGCCAAC	-6.7184806689168015	-5.18207089239898	rpsD	3439428
TTCTTCATGATCGGGAGAGT	-0.24816073413676776	-0.4205655114710034	mrr	4585352
AATTATGCAATTCGTGGTAC	-1.020750238033695	0.024958589862607017	epd	3071250
ATCCCCACCACTACCGCGAC	0.15051331893318864	-0.14273000076681186	ygbE	2871161
GAATCATACTGGAGTTAACC	0.09334772972011084	-0.005469826100845897	yieL	3898241
CAAAATTCCACACGTAATCC	-0.1915772057704004	-0.11785533212778256	cspH	1050257
CAATTTAGGCGCAGTAAATC	-0.32616324613804115	-0.418493969566297	xylB	3727018
CAGTTTTTTGGCATAGGTTC	-0.8382849399737027	-0.5355449903864721	ycjY	1389723
CACCAGGCAGATGGCATCGT	-1.976905821498005	-2.7611271077619315	tsaE	4393907
AGTGAGAACTGCTGCGGCAC	0.4384731844792937	0.16450693400259794	cusC	594911
CTTCATGCGCGGGTCATAGT	-1.2392276093667602	-0.975327666009168	ybcC	565481
CGCTTCACCGCGCAGTTTAT	-0.5797165989609494	-0.5309313150733401	ygfZ	3039856
GAAAACGTCGTTACGCCATC	0.479693809329685	0.16783547052384895	ygcN	2890920
GATGAGTGCTGCAATAGTTT	-0.2831830195714943	0.0121197817629044	gadC	1568125
GAAGTCGGTTCATACAGACC	-0.0905221060222854	-0.12485721398605976	gcd	140235
AACCTGCTGGGCATAAAGGT	-1.6248813018645096	-1.9999780225873593	fixA	42771
CGCCAGCATCGAGATAGCAC	0.5479827959642118	0.1746701081835309	dmsA	941375
CCACAATAGCCACGGTTCGT	0.1729258098148807	0.12187383142886744	mdtH	1124260
GATTTACGCGTGCCGGTGTT	-0.14021282076965336	-0.12501855016957908	prpD	351082
TCGTCGAGCAGGAGAATATC	-0.304092009334475	-0.4866844019841732	ybiT	855706
ATCACTTACCCCCGCGAGTT	-0.5700888290241302	-0.4175396708982654	flgA	1129983
GTGGTGCATCAGCATGATGT	-2.6484709476690584	-3.0704959692251514	secA	109184
GCCACCCTGAGCGTCTTTAT	0.5445221649888827	0.2939256648409023	cusS	593644
ACGTTTCGGGTCGGTGGAAA	-0.06289518655996963	-0.524779088091745	pck	3531607
TTCCGGAATACGCGAGTTAC	0.04069965906493112	0.20180293478520506	fepA	610714
AACCAGTGCCAGATGCGCAC	0.3514485425487897	0.19182041987316525	hyaC	1034338
TTATATTCCGGGTATTTGCC	-4.207518749639422	-3.707945741301972	nuoI	2394046
TATAGCAAGGCGAGCGCGGC	-0.6791397772846329	-0.21571944915764	yiiM	4101187
ATCCGTCCCCAGATGTAATC	-0.5567097992229302	-0.43316968530124267	ycjP	1372832
CGACCAGTGAAAGTACTGCC	0.551473150856783	-0.13929041987597554	malG	4241144
TGCAACGAGATGCAGTGCGT	0.27551464580024265	-0.09984638216500397	rsxB	1704844
GCAGATCCTGATATTTGGTC	-0.114791465509978	0.12096908835028453	fliY	1997870
GGATTTGAACCGACGACCTT	-6.065499744766995	-5.008978611877983	metV	2945670
AGAAATAAATAACGCGTTGC	-0.6929455768096637	0.1623518402754689	tfaR	1430677
GGTGCTTTTCGCGTTCGGGT	0.0687172545550716	-0.2010926038431372	erpA	176903
AGTCACAAAGCGTTCCCAGT	0.075841688988453	-0.009795586270329615	fruK	2260038
CACACTACAATTTTCAATTC	-0.08663817369015248	0.05124210014900843	ecpR	310061
AGCAGGATAAACGGCGTCGT	1.1509352212730544	-0.23937686922949675	ybaN	490185
CGCAGACGTCGACTTTCGCC	0.6273444877673116	0.02675122295231946	hypC	2849931
TAATCAGACTGAAGTGAGTC	-0.2876890983234053	0.05316910313582501	yqhC	3152623
GAATATGAGCGATCCCGGTT	-0.6214198210998435	-0.28322780520770485	yeeE	2082992
AATGCCGTCACGAACATCCT	0.36026073940837744	0.13892008323432892	yebE	1927133
GTTCCGGAATGTAAGAATCC	-4.7485379027729815	-6.318807229190719	tufB	4174552
CATTGCCATGGCGCAAATCA	0.2843343466902526	0.016088350751425562	yaaY	21288
GTATATCCCGCAGATTTAAT	-0.3665300909299877	-0.02799471961464928	yghG	3111355
ACCCACGTAGTGGAAGATAC	-0.12740857467615752	0.03665898047331706	fdoH	4079968
CATCGAGAAGGTGCAGTGAT	0.3288089758308579	0.02214167515943366	hyuA	3008985
AGTTGCTGCTTGGTGAGATC	-0.2815193310831986	0.02546203345104492	yfjM	2763760
CAATTCAATCAAATAGAGAT	-0.289980909831395	-0.29721088793537964	Only	1298795
GTTGCCAGTTCGGTTTTCCC	-0.29339658479982755	-0.09676469291055123	yaiW	397910
CGCCTTTGCCGCGAGCTGGA	0.6711079937503752	0.3718431720629465	hicB	1507894
GTTAAACAGGACGAGTTTGT	-0.2761751103063643	-0.1903427444331504	mngB	768352
CGGAATCGAACCAAGGACAC	-6.180211403643686	-5.9114233024553124	pheU	4360606
ATCACCGGGTTCATGATAAT	-0.09070508465667193	-0.4011458795125041	chbC	1818188
CCCATCCGTTAAGGGACTAG	0.4007135304045815	0.034512492716224134	Control	Control
TGGCGGGCAAGGGCTGGTAG	-0.0052105743463064505	-0.6236349551418294	ykfC	272308
CCAGGTTGGCTTCTAATACC	0.1620273654806803	0.4044212374185245	araD	66527
GTGGCCCCTGGTTGGAACCT	0.7392392290835987	0.5923279142438562	ahpF	639183
CAGCAATGCGGCAGTGAAAA	0.036406833246667165	0.002942413715354197	ygcS	2895848
GAATGAACTCAAAGCGATAA	0.12609115029557572	0.19688484199905695	ydgU	1669810
TGTACAGCGTGGTGCGGTCC	-0.35436013796869303	-0.7143381861603982	yidA	3874646
ATATTCTCGTGGAGGTTTTC	-0.8524237908168604	-0.11887172753801367	mazE	2909169
GATAAGCAGTTTACTGTGTT	-0.6979636515762879	-0.6483304985547242	trxB	931260
CATAACGGGGTGTAACTGAG	-0.5080278608918787	-0.2509754906612939	cptA	3038740
AGCTGGACTGTCTTCCTAGG	-0.10696242161304803	0.11963400773108535	Control	Control
CTGCCAGCAGAGTAGAACCC	-0.6165681790786681	-0.4013487040994935	lpp	1755481
CTGTACGGATAAGTTCTTGT	0.07159626170896716	-0.10580015405956213	yaiX	380095
GCGTACGGAAATCCCCATAT	-0.5243244119141964	-0.6590361408210258	arsC	3648406
TTGCCCTGATGTCAGTACCC	0.5325797340117469	0.30046152150837324	cutC	1956860
TGTGTCAGAGATTTCAGTGT	0.05239968297251574	-0.17901540757878653	dhaM	1247916
TTCGCCGGTGAAATGTTCTT	-0.07168694686551769	-0.09813754223245896	ybhJ	802782
GCCTGTTGCGTACCGTATGC	-1.1971021336940837	-1.7334918618808188	tusD	3473710
CGATCAATTCCAGTGCCCGT	1.0011987347999496	0.4691730427726231	hypA	2848690
TGGTACGTAGATAACAGAAG	-0.5243244119141964	-0.5974519313962917	sucD	763603
TTTGAGGAGTCGATCATAAT	-1.6929455768096635	-1.1261621512483235	metH	4223139
GTTGCCGTCGCCGCCTTTAA	-4.23029005729808	-5.6190867607733175	groL	4370451
ATAAAGACATACTTCATTTC	-0.7924812503605783	0.22214194594449804	insEF-1	314806
TTCCGGGTTGGTGGTAATAA	-0.08783337646710021	0.1301612833163186	minD	1224166
TGGCGACCCACAGCTCGCCC	0.5294468445267844	0.15273302780290932	nirD	3494759
AGTTTATTGAGTTCATGCTC	-1.5376673513317531	-0.09882030243555484	oppD	1303058
GTACTGCCGGGTGCGCACGT	0.3368017665843885	-0.28809550452512	yjbH	4235905
GAGCCGCGCCCGCTTGTCGT	0.7801838915571937	0.05236516840847294	thiS	4190780
ATAAACAGTTGTGCGATGAG	-1.167161012023281	-0.4441939930944584	yecS	1996305
TGACCTCATCCCCAATCATG	-5.810403158357841	-5.126162151248323	csrA	2817133
CTGAGATACGCTGCAAATCC	0.2686826123178174	-0.03127984818325813	dppD	3701653
GGTGCCAAACGCTTTTGCTG	-3.5029746331655933	-2.8136480867688336	acpS	2698842
CGCCGACAGACGACTGTGTA	0.1763370943911422	0.10743269106560828	ymfR	1204922
AGCAGCCAGGAAGAACTGAC	0.3562272651720386	0.029366053700237812	wcaK	2116299
CGCTTCTGGTGCCTGGAAAG	-0.046745446566639925	-0.4773229737746351	tesB	474066
TAATCAACCAGTAAACGTAC	-0.3620286986950465	-0.08538895332770369	pgaD	1085706
ACTGCGAAAGTGTAAGCTGC	0.4752910744798789	0.4583109803752119	anmK	1717462
TCGAACGTCGCAGTCGCTAA	0.5926406710139781	0.1270459829460373	bioC	811037
TCGGCATTGCGATGTCTTTC	0.4089131792192957	0.1686397805832731	pspE	1367992
CAAAACCGGGAAACTGGGTC	0.08953467660891112	-0.0853447524348897	yjfF	4451672
CATTTTGAGCTTCGCCTGCT	0.2716490870591375	0.11108587503760314	cfa	1739889
CAAGTTTTAATATCGGAAGC	0.142423721417537	-0.3047867588757848	ygaC	2797821
AACTGACACATTACTGCATG	0.1438531231404223	0.3409638591789748	yobF	1905530
TATCGTCGGCATTTAATTCC	-0.1867601894726245	-0.2870479390839932	bdcA	4471801
GGTTTCCGGTGCGCGGTTGC	0.38585599089793465	-0.3051798816469776	yafT	237598
CTTTTGCCAGGGCTTCGATG	-1.2401234150713494	-0.941822877102692	phoQ	1188340
CTGACCGGCAAAGGATTTAC	-0.15018557457347034	-0.20942291329174176	moeA	865355
CTGACCTGTTCCGGTAAAAA	-0.12541766942452834	-0.1665894649557652	glcF	3123058
CAGACAGAAGAGAATGGAGC	-0.3088020854766036	-0.5551788613200173	bcr	2276638
CTTTCGACTCTTCTTCTTTT	-0.5265871903875435	-0.4535358418321862	iraP	400649
TCGGTCAGGTTAGTTTTCAC	-4.51494727483167	-4.601320642964738	mrdA	667041
TAAACCGGTGGTCACAAATG	-0.8454804413779069	-0.4668759209039927	ybhI	801412
ATTTTAATTTTTCTGATAAA	-3.133518168195645	-0.033916513627886724	yafU	238869
CCGACATATAGCGGGAGAAC	0.3562979422101855	0.2561393355299091	ytfL	4438978
GGTGGGGGAATCCATCGAGC	-1.4199270824032475	-1.352086609409649	ascG	2836727
CAGGAAGCGAGATATTATAC	-0.4488580843738968	-0.6594308050392956	add	1700344
AAGATCGACACGCGTTGCGC	1.1544074131798594	1.0663946389665186	proQ	1913329
AACGGGAAATGGGTATCGTT	0.12064129895945495	-0.07006009219044185	ydgJ	1702113
TGGTACAGCTAGCATTTTAT	-0.5543215131658135	-0.385781892669353	cyaR	2165153
CAGCCGGGAGAAAATCACCT	-0.011121536835918544	-0.03411753007531915	eutA	2564851
CGGCAGCCAGGTTGATTTCC	0.4128490872129331	-0.3726944727351249	hrpB	162197
CGTTTTATGCACGTCCGAAC	-0.2548244644177785	0.1140454145952996	hyfA	2599285
CGAGTCATGGGCGAATAACT	-0.038237664762536434	-0.07200229008017456	yceJ	1118029
GCCAGCGCCAGCCCCAGTGC	0.3780822529912	-0.1063195721270167	ybdJ	605338
CGTACGCGGAAGATGCTATC	0.31590287325850075	-0.20793495279848664	ygfZ	3040239
CTTGAACCCGTAAGCCCTAT	-3.335623575387108	-3.1479226699871345	leuU	3320130
TTATTAACAGTCAGTCTCAG	-1.1110107687860755	-0.2382789497333787	sibC	3054897
ATTTCCAGACCACTGATGCG	-0.2650840371732364	-0.05291316921768496	yehT	2210810
CGACTGCATATAGTCGAGTT	0.09379906557265416	-0.07769252189402888	rffA	3973204
GGTTGGTGGATAGTGGTTAA	0.5942979888767521	0.5946436530940644	rbsR	3937103
GAATACCAGCACCACTTCGT	0.14202157645580038	0.09250093010859994	artM	900300
GATTCGAACCTCCGACCCAC	-4.929984774110513	-5.297017023841673	proM	3980798
ACCGCCTTTACGGCCTGCGT	-0.130394323508767	-0.03341678008075566	yciG	1314001
CACCTGTGTCGCCATTAGCC	-2.0474783371289536	-2.2986686497128312	fimF	4546217
GTTAGCAGGGGTGGTAAAGA	-2.7348937588076345	-2.010634028056046	argR	3383114
CTTGTTGCACGTTCAATTGC	-0.14351213719220102	-0.08518595635904648	ydaS	1418531
CCAAATCAGATCGCCCATAT	-0.11361861075794022	0.041609074797928525	mazF	2909091
ACATTTTTTTTATCTGTTTT	-1.7335875613070098	0.4064003940993153	yqiH	3188258
ATTTTATAGTAAGGTGAGAT	-1.2226256420296304	-0.19939701480604025	ygeI	2991847
GCAGACAAGCGGCATACATC	-0.2148235502626553	-0.5715732995706864	yiaM	3742708
ACTGGAATGCCATCACGCAG	-0.5693313099513894	-0.4165587646605831	ycaR	970005
CTTTCCCGGTAGGATTCTGT	-0.19663043349668566	-0.19533922850981236	malY	1699491
CGTGACAATCCCATTGCGAC	-1.0339824946447305	-0.9900254632622946	chbG	1815083
AGGGTAATGAAGTTTTTCTT	-4.5580159967235545	-5.437821910681858	rpoD	3211961
TGGAAGATATAGCCTATCGC	0.3404130201367672	0.10576831190910152	yhjR	3694172
GACCATCGTAGGATTTGGTC	0.6925051264808301	0.2114396621149568	potG	894286
GACCGCATACTCCCTTAGCA	-5.785249681129503	-6.367432582790459	serV	2816634
CTGGGCCAAGGCTTTCGCGG	0.4173740361627079	-0.047640232247089465	yfbK	2383572
TGAATTGGCAGAAATGGTTT	-0.3196112573984761	-0.1501942734180156	ssuC	993457
ATGTTCACGGCGCGCCGGAC	-4.27790807753082	-4.355469248804301	lgoD	4594594
GCTAACTGCGGCGTATCCCA	-3.915337998146112	-4.1158938157944975	rlmH	667704
CTGGCTGGGAGTAGTGTCGC	-0.11101076878607574	-0.2365890518578775	yfjY	2774746
GTTGTCTTTATGCGGAACAT	0.1528834930625762	0.07418789563656003	ycjM	1369055
CAGTGCCGGAGGTCCGGCTG	0.3236981793102081	-0.21460592641535411	isrC	2069467
GAGAAAATCCCCAGCACTAC	-0.0746244791420767	0.015451667607362385	yidE	3863936
AATTAGAGTTGCCAGAAATT	-0.5100815196598534	-0.04590798253330197	racC	1415558
GATACGAAACCATTGTTGAC	-0.23448579723969146	0.1428404526056719	ydhF	1722812
GCCGTGCAGCGGAATAATCC	0.4581881613569625	0.00233401264147437	hycC	2846635
TGCATCGGGGCCGGTATCGC	0.08887425314080287	-0.1894604387327036	ybjJ	885574
CAGCTGACGAGCAATCTCAT	-5.929984774110513	-4.926777549332347	rne	1142608
TTGGTGTTCACCATAAATAC	-2.2023570445236427	-1.9895641162388773	pta	2413751
ATCAACAAACGCGGTATCAT	0.05695907306404036	-0.0514619431994976	atoD	2321621
CACGTCAGGATCGTGCGGCA	0.16379737221010382	-0.4267299976985023	mgsA	1025952
GTCTCTGGTGCGCCTTTGAA	0.3046599080499535	-0.04715234078458064	yggC	3072417
GTTAACAGGGTAATCATCAA	-0.014174860813472412	-0.08614647240044415	yjjB	4599760
GTAGGTATATGGAGATTTAC	0.026946503997601123	-0.0016089631394351491	ygeM	2993659
CAGCAATGCTTCCGCAAAAT	-0.4585805138071397	0.03026301971486633	gshA	2814283
AACTGGAAGTAGTGGGCCAG	-0.1349501236887769	-0.2308912446179614	ymjA	1355599
ATTCAGAGACTCAATCGTTT	-0.2481607341367679	0.15872856431450932	ylaC	478447
GGTGTGCTGGATCTGCGTCA	-1.4547858396148992	-1.3122571819830025	puuB	1362873
TTCGCCAGATGGCAACATCC	0.14814020256049032	-0.17039845367358794	fdhD	4084560
TGATTAGGGCGGGTGAAGCC	-0.3203105198926033	-0.1921949324994241	ung	2715077
CACAATGTGAATATTATCTG	-0.2063955926804848	-0.14240547145695406	ybcV	578696
TCGATTTGTTCAAACTCTCC	0.5615794654675934	0.8177386916089358	recN	2750427
TATTTTGGATACGTCGTTAG	-1.74739336083204	-0.5223857499431543	bamE	2751743
TAGCGGTTTGGGCAACGAAT	0.16238937414976218	-0.11814042155483205	ybeU	679028
TCTCAGCGAGAAAATAGGCG	-1.7418551772906101	-0.9684634521392704	gmm	2123812
TGAGCAGACACACCACCAGA	0.3799659458515625	0.3977081153313391	hokB	1490081
GAGATTTGCGCAGGCGACGA	-4.035337774256742	-3.7162315424025687	hemB	388928
TTTGATACCACCGATGTGGC	-4.303443169637958	-5.017829529460251	rplM	3376438
GTGCCAGTTGCTCTTTTAAA	0.4749990605044079	1.3657402166115855	pqiA	1011611
TATTCGGTGACCAGATGCAT	-0.17099287361430793	0.10873707773795104	ascB	2839424
ATAAATTGGTAATAGCAAAT	-5.045461991530449	-2.7738638266783417	yqiG	3186319
CAGGCGACGATAGCGGTGAC	-0.018040950775709108	-0.3096032206320022	rutE	1069932
CAGCGCTGTTTCCGTTTTAC	0.2425656967386227	0.05159520498706716	cas3	2884286
GATCTGCATCATCAAGGTAA	-0.3560944308883009	-0.26745170169369314	yrhB	3582818
AAAAATTGTGTGAAAATCCC	-1.5045004873965533	-0.12758442659571326	dcuS	4348113
TCACACAGCGAGGCCAGATC	-1.3820164808715585	-1.091727504663744	fhlA	2852433
CTGGCGCAGGGTGCGACCAA	0.12227146302091095	-0.10323757413179313	hisB	2092487
ATCGCCCGCAGCCAGTAAAG	0.2183603092868487	-0.16411470348972024	yfhG	2687315
AGGCGTAATAGTGGCCTAGT	-0.18625013288577075	0.1929386214811828	Control	Control
AGTAAGATCAGCAGCATTGT	-2.5458412827774533	-3.138157270976988	mrdB	665482
TAAGCGCAATGGCTTTCCCC	-0.13255669195819994	0.033144496297080384	pgaC	1086647
CAGGCCAGTTTATTCCTTCC	0.6189449953658868	0.034328538842832934	sbcB	2081224
AAAGCGGTCGCGATCATACC	0.08375913240775601	-0.08466094451128202	tktB	2577813
CAAAGCCAGACTCGTCGATA	-0.6404781569155281	-0.6780499276999968	rpe	3512590
TGGATTCGAACGTCAATTCC	-0.8126591322982084	-0.6662545527185896	gcvA	2940226
TTATTTCCCAGGTATGTTTC	-1.146281120117554	-0.020638202649724047	ydaM	1405301
GCGGAACGCGCGCCTCTAGG	0.5596931313949045	-0.16543220078023854	Control	Control
CATATTACCGGCAACAACAC	-0.2473197576973971	-0.2977205620730992	cadB	4358014
AACCGGGGATTTCGCTTCTT	-0.12262985205290874	0.23388956314570966	ydjI	1855681
GTTGGTCAGACCCAGTTTTT	0.16238937414976218	0.18633555456801945	dacC	880426
GGAGTCCATCACGCGCTCTT	-0.07823573269445537	-0.9650546554830826	typA	4056543
GAACAGAGACGCCAGATGGT	-1.8814862564193229	-1.6744504802109883	nuoN	2389160
TTCAACTGCTGCTTTTTCCA	0.6187141826238716	0.9109062435492188	rraB	4476630
CATTGCGCTTCGGTAGTTCC	0.3023779359808632	0.31330867510407234	slt	4629132
CATTGCGGGCATGCGGCGAC	-0.4447900594081341	-0.3112842704757097	aas	2973204
ATGTTCGTTAGGCAGCCAAC	-0.06845471190187014	-0.08498253926680832	cmtA	3076757
AAGGGTCCCCAAAACTAATT	-0.6791397772846329	-0.08328681826120365	yffM	2559461
TACCTTTTAATAATCGCAAC	-0.6820572606669277	0.06188771884165978	yhiD	3653329
ATCATGGTGGCCAGGAGAGT	-5.5580159967235545	-5.8716970241397	lptD	57091
TTAATAGACTTCGGCTGACC	-1.0934835063933923	0.031667934868778724	mog	9703
CTTGAACCCCCACGTCCGTA	-4.444557946940272	-4.819500813014272	leuQ	4604374
GCATTAACGGGTCGCTCTCC	0.39661116181969214	0.059192890763594574	cpsB	2122224
ATAGAGCGTGGTGCCCGGAT	-0.9426215997884384	-0.4221956755324593	dld	2220560
TACCCGTTTTGCCGTCCAGT	-0.25600859595945313	-0.2980780650461833	sgcC	4527794
TCTTTCGCCCCTGTCGAGTT	-0.202357044523643	-0.2724696390293705	caiT	41556
CTGACGCAGACCATTAACAT	-3.760059772668201	-3.808612496871536	parE	3172583
AAGATCTCGATCTCCATATC	-1.1540794906779617	0.09030657203936564	yegQ	2164161
ACCGGCAGGTTGGCAAATTC	-0.3852458428487093	-0.5028605494866719	sodA	4098972
CGTGTTGAAGCGTGCGAACA	-0.07279364762620744	-0.07407364009986916	mdtF	3659963
ATCGCGGCAATCCGGGTAGC	0.2966666543955834	0.05332794652061401	queC	464383
GAAAATACGTTGATAGGCAC	-0.6310178276664619	-0.2078826802920628	ebgA	3220984
CAACCGCGGTTTGATCATAT	-0.06967371919103149	-0.37825963659698936	ydjH	1854444
GGTTTTGCGGCACTACTGGT	-0.7161303642304632	-0.4574022796513752	bglH	3900000
CATATGGCAGCCGAGATCTT	-2.9212145644827814	-3.9183760630970776	ispF	2869450
ACGATGGCAGAGCCGAGTTT	0.2807677316700603	-0.2255774447214937	araF	1983879
GCTTCACCAAAAACGATCTT	0.3368017665843883	0.4093899203789744	inaA	2347242
TCCGTATGTGTGACCACAAT	-0.027501280024775362	-0.035175765405784265	ybdM	634335
TTTAGTTTCACCGTTAACAT	-0.9362167278220276	-0.15774662288988994	stpA	2796216
ATAGTACCGACGTTAACGTG	-6.699371845969098	-5.730002662175169	tufB	4173998
AATCGCTACGAGCCTGTTCC	-0.2339468749170671	-0.20537493775580795	ykfA	267477
ATCCAACGCTCCAGAAGCTC	-1.3512542271008716	-0.9059923386412456	yigA	3994279
AATCGGCGTCAGGATCAGCG	-0.5536943907734617	-0.4082149687322163	ypjM_1	2771134
AGAGCGCCGGAAATATCAAC	-0.6804003234905499	-0.2105543385386961	yjjW	4612730
ATACTGCATCAGTTGGTTTC	-0.4511878306062848	0.06450451687732417	yifB	3947465
AATCACTATCCGGCGACGAC	-0.8017590639485889	-0.14076848443352585	purU	1287600
ACCATGCATTATCACCATCC	0.4254237799835559	0.11310599265289835	yejG	2276113
CATATTGCCCGGCGCGATAT	-0.42080012027611613	-0.2515323142275893	hcr	911266
AATGGCGCTAATTTCGTAAC	-0.4134092483696069	-0.02408550426819289	arnA	2366126
AACCAGTTTATTACTTTTAC	-1.0124469343024858	0.14593691666898656	gltF	3359398
AGTAATAACTGTCTGAAGCC	-1.0920415322194859	0.2925843110492996	elaB	2378882
AACAGCGCAGTAAGTACGCT	-1.1656985739447947	-1.313148146989482	phoU	3905040
GCGGAACAGCGCCTCGTATT	0.5983941982442758	0.012195411226425312	citC	650781
AATGAGATACTTTGTCTAGA	-2.678661350803416	-0.9853010438427416	Control	Control
GCGCCGATCACCGGGATTGC	0.3661610404475073	0.03832249329022397	ytcA	4302333
AGCCTTCAGTGGTTACTACC	-6.810403158357841	-6.593941112599142	rimM	2743596
CGCCACATCATCATTGACGC	-6.286470091034245	-5.230736742133258	ftsB	2870751
AGCGAATGACAGAACCGTCC	-5.543802137503854	-5.081630991277951	rplN	3445956
GATTTCTTCATTGCGATACC	-1.6779952353436922	-0.8669465947211363	ybhG	828885
TCAGTAATGCCCAGCCAAAG	-0.14593095141659007	-0.08893428977206341	crcB	656877
AAACGCCCCCGTTACTAGAG	-0.3082817265743386	-0.4415965124556349	Control	Control
GGGCACCAGATCCAGTTAAT	0.3023133901990977	0.2615503305027336	ydhV	1751663
CACGAAAGCGGGTACCTGAT	0.052125066993597535	-0.1681051890039793	yafD	231406
GAATATTGTAAGGAAACAAC	-0.8290071263856922	-0.01119643712780305	ydjX	1831842
GGGCGAGCAATGGTCAATTT	0.05442724041970815	0.1117105149289892	yraR	3296451
CGCGAGCGTGCCGACAGAGA	0.25381240191335697	-0.3916911735501997	potF	893063
GATGACATGCGCCTGTACCT	-5.500300498867269	-6.107147773329679	mukF	974831
ATTGCGTAACTGTCATGCGC	0.004605336243199032	0.034829725423981106	ydcC	1530492
GGCATAAGTTGCCGGTGTTT	0.6772004649704764	0.6002817289700257	yeeW	2076116
GTCACGGGTCGCCTTAGGAT	0.1895108004886592	0.0904654241691112	yceA	1116137
CAAGGTTTTACGCAGTAAGT	-0.07462447914207647	-0.10164404179577002	menH	2375418
GATGGGCGTACCCAGCGTGC	0.22500617636826287	0.15279225781588646	yehW	2213915
ATTCGGCTGGCGCGCGCTTC	-0.3122910715564835	-0.4889931033761201	rna	643890
AAATACAATACAGGAAAGTA	-1.1404045537808851	-0.11214168093338883	yiaM	3742392
ATTTTTCAGCCTGGATACGC	-4.492920968501671	-2.8681903059288616	csrA	2817022
GGTTAAGCTGGCAGTAATCC	-0.020240181446841362	-0.2797472364727428	ybhJ	803536
GGAAGTCAAAGCGATAGTCC	-1.1514847147250942	-1.5923917710782405	betA	326361
GCTGACCGGCGATACTTCAC	0.3837471801848207	0.07619212263550046	yfjP	2765905
GCCGTCGCAGCAACAGTCGT	0.6570610411111324	0.14187870009463333	zntA	3604551
CCTGATCACCCAGGCTACCC	-5.070465997660343	-5.735761931463853	rplI	4424164
CCAGTCGGGCCGAGCTGCGT	0.3821051284515973	-0.21709463253952568	yadC	150767
CGGTATTTCAGCGCGCCGCT	0.5698611129726923	-0.2352101144197548	yjdI	4350065
CGGTGTCAGAGTACGCCAGT	0.4751852507403105	-0.008399487614816792	ybdZ	613329
TTGATCGGTTTGATAAACAT	-0.7414070657663089	-0.11709940072935646	yfgH	2627906
ATATAGCGTTCCACCATTAG	-3.640478156915529	-2.97547024124433	waaF	3793337
ATCAACTGCTTACTTAATGC	-0.2979137693338673	-0.13785437922576727	yiaG	3717763
GGTTCCCTTACGGGTTGCTT	0.07306854986704114	-0.31617895593902434	eutK	2553468
AAGGCAACGAGAGATGAGTT	0.11440934524794022	-0.33641792631232914	insG	4501366
TTCAGGGGGGACATAACCAC	0.012529731228726693	-0.1565358002918421	elfC	998915
CACGCTCATCAAAACGTAAC	0.9548795151680064	1.0959517960976708	fimE	4540279
GCCGTGCTGATAGAACCCGC	-0.05314475173162525	-0.4808078356475039	brnQ	419323
CACTTTGGCTCCAGTTTGTT	0.2905081143104533	0.10833760520573256	csdA	2941748
CACGCCATTCAACACAACCA	0.344001257748094	0.4160074411752459	yqfE	3057605
AAAACCCGAGAAGTTGAAGT	-0.7745593423633157	-0.0540588514288054	fruK	2260074
CTTTGTGCGAGTCGTAGCAA	-0.07200377898294086	-0.20111531075566516	ilvE	3950627
GCCCAGGCGCAATACTTTAC	0.16534361405104292	-0.06665029677464708	glpX	4112812
GACTTCAGCCGCAAAAATAC	0.38058345861230136	0.13892008323432914	mngA	765929
CAGGATTGTTCCCAGAATTA	-0.3330496317232809	-0.30428942073553444	cyoD	447137
GATTTGAACCGACGACCTTC	-4.193019179944306	-5.205779319311692	metV	2945669
CACCTCCAGATTATCGAGAT	0.2156926810851223	0.07974726751534145	scpA	3058997
CAGCTTTTTACGCTTGGTTT	-5.4705531554732145	-5.151060670225691	rpoC	4184002
CTTCCGGGATGTAGAGCATC	-5.7184806689168015	-5.471577509593965	ubiB	4018918
TGAAATCAATAAGCTCATCA	-0.6194165413876986	-0.1225188620654063	ybfD	738044
CTGCACCGGATCCGGGTAAG	-4.087937133886749	-3.0879191882174517	pdxJ	2699684
CACCCCTTCATCACGAATAC	0.30438028889201085	0.014392815132431291	uidC	1690316
TGCTTCGGCGCAGCTTAATC	-0.25755943213901744	-0.12727120578664766	ptsA	4139622
ATCGCTGGAACGGCTAATAA	-0.4521746261583613	-0.23016783018401976	ybhH	800164
AAATGTCCGTGTTGGCAAAC	-1.940579889349712	-1.5975100887543126	rhtA	848626
ATAGTGAGCCAGTATCTACT	-0.7690766460256346	-0.5500802385030465	Only	3999251
TAGGGCGATGCGGCTGCGAC	-0.26573336358471755	-0.5011839716792882	purR	1736567
TATTTTGACCATATGATTAC	-2.4861500105242342	-1.0699134455440915	nsrR	4404326
AGATAACCAATCTTGATGTC	-0.6017976887514686	0.3052784696564492	ettA	4628344
TGAAAAGTGAGTAGGCTACC	-3.133518168195645	-3.317000472485089	trkA	3434789
CACGCCATAAATCGCGCCGC	-3.1506728892347122	-2.8253298918164687	ubiX	2426614
TGCGGTGTCAACTTGTGCAG	-0.6316741450820825	-0.8596055221142098	yohH	2226668
CCAGCCTCAAGACGAAATAG	-0.19117075555193808	-0.017471762554290615	yraI	3286341
CATTTCGACGATTTGACGAT	0.057825816881573074	-0.1727460274731013	yagJ	290870
CTTGCAGAGTCCCCTGCATC	-0.27008857307152057	-0.3217444325361596	glcB	3120949
GTGGATCTTTTGGTGCGTTC	-0.06289518655996963	0.11824836831975928	yihI	4049541
CTGAACCGGGGCTAATGGGC	-3.158609149158476	-2.2423719697711464	mdtA	2152207
GAAACGGTGATAAAGCGCAT	-3.5294468445267846	-3.2747172266401563	rnc	2701925
AGCGCCCAGTTGGTTTTCAT	-0.03445404066654234	-0.14747171786360558	ompA	1019122
GAGTAATTGTTGTTCGTCTT	-6.9941151115302285	-6.490436536845281	murB	4170148
CACTTCCTGAACCATATTTT	-2.633491726599421	-2.249645204683324	frlB	3499331
GATTAATAATTCGTTCATAT	-1.5925436798518262	-0.2382103096210403	ydcY	1515734
CGTGCGCGAAAGCGACGGTC	-5.84559258682014	-5.425996475285069	tamA	4440562
CGATTTCGGGTTTATCGAGC	0.011598539664165129	-0.3578666061004606	nanE	3368975
TTTTTTGTTCGGCAAGTGGT	-1.2454865998384423	-0.2710092640771262	hsdS	4579006
AGCGCGATGGTCGCTGAACC	-1.5461041884803928	-1.7517274333298851	smpB	2752943
CCGCTTGGTAACCCCATCGC	0.357265869144104	-0.2074802652879918	yggP	3075193
TTGGAGCGACGAAACAGCAA	0.18765832727857898	0.20683024879078893	motA	1974977
CACTTCTTCATCCGGGGTAA	-0.5123733311678429	-0.2470165461227093	pepT	1185570
CGGAATACCGATGGTGGTAT	0.21910672391463384	-0.007672414377359659	eutB	2556259
CGCGCCGTGGCCTCTTCTTT	0.043408576346801515	-0.5295704772772599	yecC	1995487
GGATACTGATCCCACAATAC	0.014873671697026138	-0.028985750571331126	ybfF	711497
ACGGGTAGTCAGTTCTTCAC	-6.38941639274781	-6.773207160740338	adk	496845
GTGCCAGTCGTTCCTTTCCT	0.9336900283953404	1.200439241694721	ompG	1380033
ATGAAGCATATATGAGGCGC	-0.32759520163117284	-0.2660142770903353	yfdE	2486828
AACGGCAGCAACGTTTCAAT	0.00588488846977131	-0.0845245553764542	hchA	2034082
CAGCATCGCATGACGAAACC	0.8793058721619385	0.2967826946188428	clcB	1663398
TTATCGAGGCTTACGTTATC	-0.2551641218745302	-0.21359048968162966	katG	4132258
CTGAGCGCGGGGAACCTGAT	0.4519102440557639	-0.17103536998695734	polB	65638
TTTGCTGGCGCTGGTAATTT	-0.5392659055572299	-0.15178540073843738	rsmE	3089311
TAAAAAAGCGCATCTCTTCC	-0.8916908542884774	0.23812176094143456	yigL	4008574
GGTTTCTTCCCACAGTTCAC	0.3320007803205671	0.5534080053319852	nudJ	1193363
AGATGAATGCACGGGCGGAG	0.4256110335422445	0.15540820602289807	tpke11	14128
GCAAGGCCCAGGCACCTGAA	0.2794685915184365	-0.17118257625624367	yhaI	3251158
CTCATAATCATAGAAGGTTC	-5.27790807753082	-7.171486141757813	ddlB	102850
CAAATCCACGACAATCCAGT	-3.8299559557792406	-4.516431745378227	rsfS	668033
GTTGACGGTCGAGTTGCTCC	-2.121317714590118	-1.7841179349507867	sapA	1354520
CAGGCCGCCAGCAGGATAAA	0.1445293336242759	-0.17861396575090682	ybaN	490194
ACCCGCGATGTTTTTGTATT	0.045570468919942535	-0.02366294286681536	yehR	2209495
AAAGTAGGTATGCAGGGCAG	-0.6631982334156118	-0.18253100882478698	yeaD	1862353
AGTTCCCATTTAGAACCTAC	-0.10131934580749656	0.004776070845762037	fklB	4427454
GGTTAAACGATCCAACTTTC	0.28280687694365914	0.019786972348620813	yfjT	2769557
AGCGCGTGCAGTGGGATATC	-0.8437065737157513	-0.3625060426128189	acnB	132189
AATACGTTTACCCACCTTAT	-0.2226256420296304	0.02833954261644145	yddA	1576738
CAACGTGTACCAGTACCCAC	0.7857865977865699	0.2832772780253263	hypC	2850021
GCTCGTTCCGCAACCGTTTC	0.6609130069691396	0.4996639243432894	gatZ	2173929
GTAAAGGCAAACGTCAGCAC	-0.15258307415453676	-0.4646580956541743	ydjN	1809850
TTTTAGCTGCGGCTGCAACT	-2.7390419913991177	-1.876242194112444	dppF	3699969
TCTCCCAAGAGCCATTTCCC	-0.152938053456936	-0.11660026894215815	ryeA	1921162
CAGCTCGGCGGCAGGACGAT	-2.2712443472498087	-2.5769464716695376	motA	1974589
CCGAATAGGCTGCGGGGAAG	-0.5015800510938401	-0.544265953574951	ydiE	1787693
AACTTCAATCTGCCGTCCTT	-0.009823565501503095	0.209970693652036	npr	3346161
CTGAACGGGGGTAAACCCGT	0.012769083372102584	-0.13694507193396166	paaD	1454173
GCCTCACAGCACACCTTCAC	0.5064368664802841	-0.27472604121716515	rrlA	4036748
AGTAATGAAATGGCGTGGGC	-0.4128376576169285	0.16855957367420316	kdpE	720331
ATTTGAAGTTATCCAGAGAT	-1.2610997898442662	-0.1439526708542288	higB	3232340
GATACAGTGCGGCCCACTGC	0.256631417900405	0.07651345657911324	hofO	3519313
AAAATAAGCAGTAGTGTCGT	-0.985126328302974	-0.1867340563449452	yicS	3838245
TAAAGCAGTACGGCAGGTCC	-0.5066224101807377	-0.3841497077510345	pyrE	3813519
ATCAGGAAGGTCGCCCTGCC	-0.0037720811003738586	-0.5854122070357505	yqcA	2920828
TGTCAGGGCCGTGAGGCTGT	0.3799659458515625	-0.19130121845251905	ypjK	2768532
TCGCCGGCGTTATCCGGATC	0.01649558872101609	0.07010554990368223	sroA	75553
ATCTTTAACAGCCTCATCAC	-0.3946043022399175	0.01725184078286901	ydfP	1637376
GCTGACGTAGCTGTCTTCGT	0.8641109273416079	0.193357303131499	sufB	1761306
AATCACCACGGTCCAGTGAC	0.05718447655499004	0.04126823372590693	fdnI	1549409
TTTAAACGGACTGATGAGTC	-1.1586091491584758	-0.565904549483994	rluF	4228384
ATGTTCAGTGCCTCAAGATG	0.07634130441442077	-0.0270817567281123	yiaJ	3740237
CGCTGATAGAGAGTGCATCC	-6.547368752524045	-6.571573299570687	lptG	4486076
CAGCGGGCGGCTGGTGAGGT	-0.1068625361945923	-0.17718947151018485	yagH	286798
ACATCGCATTCGTAATGCGA	0.0705931129554509	0.14693236209788196	nc1	296445
GATTTCCAGGGCTTCGACGC	-0.40570201112324794	-0.19689353790798314	yceH	1125949
GAAGTCCGGCAGTTTAATAT	-0.21489828000501965	-0.041413184088116665	nagE	703514
GGATTTCAACAGATAGACAC	-0.2654387255686033	0.09753520735038812	rarA	937687
AGTTGAAAGGCGCTCAGATC	-0.23448579723969146	-0.33358402318321945	truD	2869029
TTTACCCGCCGCATGCAGAC	-0.11348325446559634	-0.01790692933906857	fruK	2260284
AAAGATGTCACCATTGGCAT	-0.3568963736776485	0.07127011723096999	yciA	1310200
CTCGATATCCCCGAAGGTCT	-0.09709475994577144	-0.3325272499285165	yabP	58827
ATTGTAGTTTGAAAAGGGTT	-0.8331232348579237	-0.416542513428068	yejG	2275943
GTTCTCGGCGCGGCCCTGGG	0.751839265863232	0.08650713035448533	yfiB	2742075
ACAGTCGGAATGAGGATATT	-0.4552051911397798	-0.6624817957688967	hinT	1161238
GTTTAATCCGGGGATGAAGA	-0.3431738489969881	-0.1843013286745536	ynjF	1839413
GTGCAAGTATTGTACCGTGC	0.6484995161705478	0.11818539116207982	yobH	1907092
GCTTATCCGCGAAGAATTAC	-0.025413624404952984	-0.21919140814161	ydhT	1747147
CAACATTGGTGTGTTATGGA	-0.9775131441930988	-1.1056349019918044	yfeD	2517026
AGCAACCCGTGCGCGTTCAC	0.3306178949610159	0.17651853257589956	ydhT	1747174
CCATTTCTCCACGGTCTTCC	0.025751725427543448	-0.11378615283250505	yffS	2562824
TTTCAGTTTACGCAGGGTGC	-0.7814822514113213	-0.2308383271199127	ppc	4150805
GTTTGCCGAACAGCACAACG	-6.487361443159768	-5.66639684577228	ssb	4272316
TACTTTAATGCCTTCTTGTT	-0.5381918723485788	0.2813755052208444	xylF	3729459
CTTGCCAGGAAACTTAACAC	0.18571437932107335	0.2110211317626245	nudF	3175554
GTTCCCGCATCAGAATTACG	-0.0390005694113551	-0.3145489934909921	yjfY	4422605
CTGCCGGACAATTTCGTTAT	0.05442724041970815	0.13524754402356964	yaiI	405158
CGCAGCAAGCGCTCGCCAAT	0.7113444876351727	0.08727132986287844	etp	1043836
CCAGGAGTCACACACTGACG	0.13547096077577006	-0.17268322286843973	kilR	1416217
GATGACAATGGCGATTTGAT	-1.0217950383503709	-1.1422751071666726	yebQ	1908476
AAACGGAGGATAGGAGGCTT	0.16468255172916413	0.2698992542441181	artI	902129
TTTAAAGGTCCCCGGCGTTC	-0.4414068098136995	-0.21983838220036026	kbaY	3281308
TTTACCTGCGCCCACCATCT	-1.0385425775906585	-0.34338691445926384	actP	4282432
TAAGCACTGTACCTTCAACC	-0.3303754974249554	-0.10918634693806373	csiE	2663679
ATGACCCGAGTACCAATTCG	0.26216296569163244	0.32805974189954323	yieP	3939137
GACGGGTAGCGATGCGCAAA	0.12848453045966335	-0.16454761404843765	yggS	3093432
ATTGAGATTAAAACAGTGCT	0.05139954772214006	0.28244739461203405	gspK	3461245
GGTGATTACCCCAAACGAAC	-4.248160734136768	-2.606061675955977	cydX	773457
TAAACCACTGCCGCTGAGAT	0.20968984868104898	0.41102965019477894	dcuA	4364361
GACCACGCCAGAATTCAGAT	0.26026021171139524	0.26972895441025546	uxaB	1608577
TCCCAGTCCGCTTTGGGGAT	0.1793893764556247	0.23887289223806896	inaA	2346894
CAAACCAGCAACGGCGGTAT	0.1884099266917174	-0.26563723745122503	gpmM	3783930
TGCCGGGCGATAGTGATGAT	0.06378327217797253	-0.0041590000603772825	dcp	1625331
TACTCAGGGACGATGTTTTA	-0.3439197169421987	0.032841563816642605	dksA	160584
TGCTCATTTGCGGTGTTGAC	-0.05551565619437193	-0.8755794864607859	yahN	345238
CGGGTCTAACAGTGAGAGAT	0.2664124386929905	0.015779748575464048	yobB	1923646
TATAACGGCACGCTTTCATC	-0.482936879929048	-0.21766600015225454	yibT	3774274
CTTACCGGGGCCAATGTTAT	-0.21310286791112376	-0.3340417428858796	rrrQ	1637750
TTTGCCAGAACCCGAAAGCC	-0.18953300416605945	0.1712096211908345	uvrA	4271803
ATCGCCAGGCATGGAGAGAT	-0.2451330414391997	-0.12411432259946464	rcsB	2314363
AGACCTTACCATCAACGACC	-0.021105625408540662	0.05626100841147785	renD	567303
GATACTCTTCCCCCTGAATG	-0.4629799357684149	-0.14273000076681194	xanQ	3023231
TCGTATGAGAAGTCATAGAT	-0.07389418550922655	0.1050493889048818	uspE	1396526
TCACGCACCACCGCCTGTTC	0.3088859519889302	0.02573055135223856	mutT	111180
CAAACAAGGTGACGTTGATC	-0.16836899588426812	-0.5677106599382873	pnuC	782542
TTTGCAGCGAACCGCCGCTC	-0.040565314728400186	0.09473073440953383	flgI	1136436
CGCAGGCCGGACTATGATGC	-0.08687982710370701	-0.4100769201989547	yehM	2203744
GCGATGAAGGCATCTGTCCT	0.4765518960946586	-0.14540305795721886	yedL	2008923
GCCTGCTTGGCGAGATTCTC	-0.12802815597873995	-0.2179363449559858	mhpE	373525
AGTCAGTACAGTGAAGCCCG	-0.4958642440024033	-0.09731426325574966	hycC	2847118
GCAGGCTGCTTTTGGGGTAC	0.4504955031319622	0.15525791746180673	yjhI	4523722
GAGTACCGTAGCGGGTGTAC	-5.536642345930988	-5.944680118383611	secY	3441766
AATCGCCTCATTCGGGCATT	-0.1424989577890119	-0.11891072799192505	yfhL	2697735
ATATCATGCTGAATATAAAC	-1.1656985739447947	-0.24192729152248704	mlc	1666021
AGATGTGTTTAATTCTGGAT	-1.2075187496394222	-0.1274084375866994	yeeN	2054998
GTGGTAGGAATTGCCAGAAT	0.1509352212730546	0.2529299043173274	fucO	2930636
TCATAGATAGCCAGCAACAT	-0.259049050279504	0.1363406170708772	oxyR	4157003
ACAACCTGACAACAGAACGG	-0.08489946297546648	0.10945192293129867	rdlA	1268565
CCTGTTTTTTGGATAACCGC	-0.5748898152879514	-0.24440855631717665	alpA	2756703
TCACCGCTGATCACCTGTAC	-5.205262775699054	-3.317000472485089	gpp	3961931
CAGGTCAGCGCGAGCAGCGC	0.480537244045838	-0.022442904704559563	recN	2749987
AAGGTAAAACCGTCTGTTCC	-0.6684925330851246	0.02833954261644145	fimZ	563523
AAAAGCGACAGACACAGCGC	-5.085262999588424	-4.963890722349447	hemA	1263416
AGTCGTCAGCGCCAATCTCC	0.4400117609448397	0.014384506495837448	ompR	3534322
TGCAAGGCTTGGCATCTGCT	0.0463639578248416	-1.2111307755647558	degP	180988
ATCGGTCACCCGCGCCAGAC	-2.4821411297484275	-1.4113262120307275	priC	489642
CTGGTAGGTATCCATGTGGT	-6.4705531554732145	-5.7242203095811615	murC	101355
TATCGCCGGAAAGGCACGGA	-0.11175976683399136	-0.4649508800368916	rnd	1885960
CTGTAACGATCAATTTCTTC	-0.1885177877093661	0.011573348121710179	yaeH	184056
CCCTTTTTCACGGTAGATAC	-0.6141440091020655	-0.6401603848280988	iaaA	866714
CCAGCGGTTAACAAGGCAAT	0.3450222733893569	0.09544341703295567	yghB	3152171
ATCGTTTTGCCATATATTAT	-1.2195915819399972	-0.4230133940151155	ydeT	1587766
AGCGGTCAGCAGATGGGAAT	-0.06811569297400566	-0.4663301395433493	ygjK	3227659
CCAGTCGAGGCTGACGTTGA	-0.3022816728834171	-0.5160781869789827	ahr	4493517
CAAAACACGACCCGTAACCC	0.5872909190990685	0.36401925028200144	mug	3213471
ATTAACAGTGATAGTGACAT	-0.16122509736548696	-0.0037211292719505633	ydeR	1586247
AGGTGTGAGCCAGGCCCATC	-0.8717583815724901	-1.0092291015115489	fryB	2506229
CCGGTCGTGAAAAGCGTTTT	0.16885712927031693	-0.12411432259946507	yaiO	379709
GTGGCGCTGTGAATGGCAAT	0.10752295966270052	-0.30702742681929285	basS	4330959
AACTAAGTCCGGGCCAATCC	-0.0891240488371916	-0.11039401864712163	pdxA	53370
TTTCTTCAGCAGCTTCAACC	-7.340917875056619	-7.1690051522540585	rplL	4178715
TTGCGCTTGTGGAGGATAGT	-0.2240068724279909	-0.4029231016405765	btuF	178308
CGTTTCGTCATAGCTGGTAT	-0.3623002648211924	-0.4150155218662028	pqqL	1572880
AGCGAGGTAAAGGCAATCAT	-2.7184806689168006	-2.659036140821025	nuoH	2395203
CGCATGTCTGGAGGTATATT	-0.2381070694728449	-0.5804953752599918	wbbJ	2102751
TAACGGCACCATGACAAATA	-0.11101076878607574	0.15255194882209544	yaiF	381878
AGCCTGTCGAAGCTGCCCTT	-0.23789239868294065	-0.12244260162343445	smtA	972822
ATTGCCGCCGCGGTACTCTT	-0.09348350639339233	-0.21143404644074013	yihS	4069283
CAATGATATACCGTAGATTC	-0.0073065631517519325	0.11610288759904885	yaeH	183874
GGCAAAATAGAAGTGCTATC	0.4821411297484275	0.2202637153970055	mtfA	2041873
GTCGCCGGAAGGATCAGTGC	0.2967860877365092	-0.3018609272001185	menA	4117832
AGATAGTGACTAGACCCTAG	-0.036150331327440936	0.13939708606257528	Control	Control
AGCGGCGATAACTGGAAATG	-0.18424897031657472	-0.07961842940294661	nhaA	17770
AAGCGAAAGGTCGTGGAGAG	-0.4491795046806488	-0.4175396708982654	allR	532392
TGCGTTCTCATCGCTCTTAC	0.7832034367725675	0.2117479302872598	yfeK	2535654
CTGCGCATCAATGCGATCGC	0.2021522398896063	0.04140357732006672	fliD	2003170
ACAGCCAGGGCAGTAACAGC	0.3697901785382991	-0.08758844657435083	recE	1414927
GTTGCGGGTTGTTGTTCTGC	0.12734840095543865	-0.2252485503758567	ynfO	579646
ATAGTGCAGAGGAAGGAGCG	-1.224392568203818	-0.9806859648924248	fecI	4516075
ATGGAGAGTGGTCGGAAACC	0.1654835298422097	-0.05651281207968618	allB	539304
GAATTTCAATGGTATTTCCC	-0.4922482265725349	-0.3006866509774635	rbsD	3931656
GCCGCGATGACCGCAGGGAT	0.11825141154233455	-0.1745023468212913	yedE	2006350
CATCGCTTGCCAGATAATCT	0.12834853620581432	-0.06817992587099564	ybjG	882118
GGATCTTCATGCGGAATAAA	-3.7924812503605785	-5.669605382531213	lpd	128369
GCCTTGCGCAGAAACGGTAT	-1.3946043022399175	-1.602600195191311	sdhA	755261
GCAAACGGCGACCAGGTGAC	-1.861012632031394	-2.221188758634096	pgsA	1990760
ATTGATACCAAAGCAGATAC	-0.1783724039799055	0.20062078290650145	lplT	2971601
GGGAAAACAGCCCAGTTCAT	0.4534979912934856	0.2571990397193653	sgcR	4524520
CACGGAGTGAGCGATGTTAG	0.15120137661757638	-0.16718304449135102	ptsA	4139091
GAATGCTGGTGATAAAGCAG	-1.181595404573947	-1.0940300714762776	ypdA	2497029
GACTTAGCAATGGCTGCTCC	0.7986334773421733	0.3484046169981088	ydfV	1644018
AACAGAACGCGCTGCGTGGC	-0.19990556552954666	-0.28236077982670216	lplA	4622053
TACGAACGGTTGTTTAACGC	0.7017623933940906	0.0046825057995709685	frvA	4090641
TTCAATCTCGCTGATCTTAT	-0.4971882819766825	-0.2535602546867069	yaeH	183758
TTGCTACTGGAGATTAAATG	0.2800873755900668	0.30480324430773803	ryfD	2732239
ATGAAGTACAAATGTCGCGC	0.08887425314080287	-0.11884351021989192	ycbV	1003147
TTACTTCAGGAAGCTGCGCA	-0.5149472748316691	-0.04869084507622578	ynaE	1432216
TAAAAATAGCAGCGACTTTC	-0.3674596625091121	0.105271302157949	cdaR	183298
GCCGGTGATGTTGGTGTTTT	-1.5525889243392272	-1.6011920662487409	pta	2413254
TACGGCTAAATCAACCAGTT	-0.018857185615523964	-0.3474052533443865	ddpX	1561084
GCAGGAATTAAATGATGGTT	0.1657562252481608	0.062104486183498286	smf	3431372
CGGACCATGCCAGTAAGTAT	0.3113725797840252	0.2593941797088681	tdk	1293134
TCAGGGATGGTGTAAAACGT	0.09504402038100944	0.10346454545231842	paaB	1453139
GCCGTTAGGGAAATATTTTT	-0.0485292258782648	-0.08825106072536781	argP	3058293
AACTTCGTGGCACTAACATC	-0.6578317236657961	-0.28745529244201273	elfA	997260
ATGTTCGCGAGTATCATGTT	-0.17232932117712185	-0.07528547976867739	nemR	1724061
AACCGCGTCACGCAGCTGAC	0.30267598267976203	0.3182437826788911	betI	328362
GCGTTCAGTCATCTCTTTTT	0.5912230421134741	0.1795383510921449	yjbD	4229632
ACACCATTCATACACTGTTT	0.05599265902261874	0.1343415486365569	hlyE	1229376
AATTTCCGGAACCTGTTTAC	-0.9595912361958364	-0.09968770633820367	yfjQ	2766968
CTCAACGTTGCCCATATCAC	1.211085364659614	0.5826140411362397	pflA	949738
CGTGGCAGGCAGATGACCAC	0.42253164061027215	-0.09776675550297532	napH	2297371
CGATAACAAAGCCATTGACC	-0.018040950775709108	-0.051395746308558136	araH	1981211
ATGCCCGGTAAATAGCGCAT	0.36117536193698574	0.004237502780939596	ebgC	3223908
ATAGTTGAAGGTCCAGACGC	-1.9608787820562965	-1.8249575353707608	nuoM	2390462
CAATAAAGGCGTCAACGGCC	-1.4034389596146786	-1.0462537452769318	nrdE	2799484
TACCAAACAGAATGCGGGTT	-0.7193737020873088	-0.638687495429223	yqhD	3153401
CAGCCAGAGGATGATTTGAT	0.5294468445267841	0.17035854748886958	fhuB	172334
AGACTCGAACTCCCAACACC	-5.0066060557134255	-5.2071618733618115	trpT	3945020
TATCGCTGTAACGGGTAAGC	-0.4980338918953229	-0.1673750326533069	ynaA	1425440
CATAATGTTGCGGATGATAT	-0.8316518476412558	-0.8741360695911177	hyaB	1032785
CCCTTTTGGGGAACCAGGAT	-0.6474309175572951	-0.5044591037121493	ydjM	1808644
CATGGAGGCGATTTCGTACA	-0.2353366937791842	-0.20900322018597808	insH-5	1426509
GACGGTGGCGATAGGCATCC	-0.3642944680826585	-0.990750529210454	araC	71112
TAATTAATTTCTCCGGTTCC	-1.7335875613070098	-0.0719181114740366	hyi	535574
ATCCCCAAGGAAGATACAAG	-0.2712443472498089	-0.015179951046300657	yhiL	3631598
TCGACCACAAGCAGACGATT	-6.5790776122513845	-5.347677287643852	dnaG	3209901
CGCCGCTTCACGAGCGTTAC	0.6634641924984719	0.010114069117608926	rph	3814355
CTGAGATCGAGCGTCGCATT	0.05669384739165316	-0.04347313580520629	hipA	1589630
CTGGCGCGGGCCGAACAAAC	0.4900726061926397	-0.019223475937971246	wecC	3969827
AAGCTGAATGCAGGGCGTAT	-0.25441972460845	0.1103855276261112	yeiW	2263229
GTTATAGGTTGGGGAACCAT	-5.599836172418182	-5.751482389585622	gltX	2518168
TGCTCAATCCGTTCGCTCAA	0.3338960354089773	0.2960421473043924	yghD	3108971
CTACCAAAGTTTTGCAGCAT	-1.9764440852031733	-3.003419086536084	secF	428976
AGGGATTCAACGAAGTCATT	0.26095800860088225	-0.06786111937269479	oppD	1303114
ATCGTCTTCGCTGAAGGTTT	-0.7953928457804813	-0.2663239458299542	yaaA	6179
TGCCCGGCAACGCCAGTAAT	-0.1730592788960491	0.06767935665142333	yjcC	4273515
CCGTTGTGAATTAACAGTAT	-0.34502227338935704	-0.018389507522190932	panE	443463
ACACGGGGTTGCCCAGGACC	-7.5039761570106664	-5.884456254855041	malX	1697532
TGGGTAGTGCGCAGGTTGAC	0.017463789162733608	-0.3965683807640208	chbG	1814679
TCTGGTCTGCAGGAAGAAAC	-0.21090933884019614	0.03921518851837513	intS	2465158
CGGTTGTTGCAGATGGCGAC	-1.8449486702547135	-1.717424166034141	glnD	187440
GGCAGTTCCGCACGAATGTC	0.5257617977189282	0.14774933380827004	grxD	1731957
CGGGGGAAGCTCCGGCTTGT	0.35952184308447205	-0.14587731879312005	ypfN	2590894
TTGGCGGCGTTGCCATCGAT	0.028479166460764205	-0.07571101973413374	grxC	3782366
CATGTTGATGAAGACGAATC	-0.4391889845638808	-0.3992577507033797	yeaW	1883138
TTCAATTTTGCTTGTGAGAT	-0.6445825552482649	-0.0474140779117298	yraI	3286663
CTTACTGGGTGTGACTTCAC	-0.5663121382786465	-0.29193089101631786	yeeS	2074634
AGAGAGCAGCAACGCCTCTC	0.6303757533775649	0.2513113207805222	yhaK	3252601
GTACGATTGAATCAGAACGT	-0.05551565619437193	0.011305886649980891	ybhL	819119
TCGAGTTCGGTTCCCACCAC	0.5778871995845374	0.03940727893086726	rffA	3973191
ATCCGATTACGTGAAGTAAA	0.11440934524794065	0.38323792666305856	spf	4047958
AGTGTTCAGCCGTGAACAGT	-4.5939355709784975	-5.001189263772423	rimP	3315777
CTTGCGGTTTGCATGGTTTG	-0.5092336236372755	-0.6477369994225335	yedJ	2030557
CATTCCTGGTCGACATATCC	-0.5040278600243039	-0.42590958949860624	ydfX	1645617
TACGTTATCGACCAGAGCGG	0.17099287361430782	-0.25471619423074565	envR	3410916
ACCAGCGGCTGGGATGTGAA	-0.07001522588948728	-0.14429220453709524	ydbH	1441309
CATCAATACGCTATATCTGA	-0.0370429961228933	0.07173318738127499	sraB	1145828
ACCGGCGAGCGAAACACTTC	0.6355751953881277	0.5289303009141468	trmA	4161191
ATCAAGGTCGTCCAGATCAT	0.4657212469163972	0.282314940923003	hsdM	4580491
GCTGATGAGCAGTACGATAC	-5.138931664382009	-4.58439733992827	yfgG	2627365
CACATACATTGCCGCGTCAA	0.23339738146502745	0.2746498533075543	gcl	533157
GGTGAACTGACTTTCAGGCT	-0.2272820044608519	-0.046797804924618935	paaE	1454864
TAATTGCACTCGCCATTTGC	-0.8405027652235215	0.2579103093329367	glcG	3122227
TAGATTCTGTCAGCGAACTG	0.11440934524794065	0.46884096887522203	yhiJ	3630082
CAGAACTCGGTTCGAGTCGC	0.17911503463575595	0.02683473221542143	vsr	2028705
AGTTTTGATATTCAGGTCAT	-2.006606055713425	-0.9349486790270372	dacA	663098
TCGGGCTAGTGTCCACTCAT	0.8513749394141465	0.4171702450861907	gadX	3663364
GAGGTCTGTTCAATGACCAT	-2.8035364388695743	-3.0930193495419096	clpP	455953
GAAGTTCGCGAGCCGGAGCC	1.4633044877355719	0.8350519598919577	rbsK	3935815
ACAGCATCAGGCTAATCGCC	0.3368017665843883	0.24230966548441546	yaaI	11754
ATCGAACTGCTGGTAGCGAG	-0.985126328302974	-0.9542930785768012	yfbK	2383437
CGGTCAGGAAGGAAAAGATA	-0.4425387793036193	-0.4055633481317569	yidI	3854849
GCCGGTAAGACGCATTGTTG	-0.006433906671888368	-0.07554811406038142	ybdZ	613247
TGGCCGGTAATGCACAGAAT	0.04189684546357264	-0.4192050130997931	gcl	533426
CGAGGTGCTTTTACTGTTTT	1.8177441615328664	1.447757427878028	proQ	1913060
CATCCAGACGAATTCTTTCC	0.19296599401073689	-0.15429732809584285	pgaB	1088412
GGGTAACAAACGCTGGATTT	-0.13285774472753695	-0.1998548379717926	chbB	1819447
CAACTGGCGGTGCTAAATTC	-0.3626378163063281	-0.4970950836114095	caiT	41679
GCCCAGACGTTAAGCAGTAC	0.4724158994904053	0.11445072893234445	ccmG	2290776
ATCTCTGTCAGGCCCTGTCC	0.6106429273747651	0.3741651066428402	wecB	3968343
CATAAAAGCGACAGCATCCT	0.024211536276362192	-0.11836109726561385	ygeA	2977993
GCTGCAACGCGACGTCCAGC	0.4612382884239428	-0.27897443619475404	flgF	1133253
ATCTGCCAGCCATCCATACC	0.20940585918368715	0.09594301048905374	yedW	2036682
TAACTGAATAGTCATCATAC	-0.6945934296911459	0.1560225109250426	ygeG	2989602
GATTTCCGGGTGGCTAAAGC	-0.7865806489208937	-0.3445672029211063	rof	213724
GATGAAGTCGGACGGAATAG	-3.9079584677805146	-4.681997289264337	guaA	2630112
CTTTTGTCGCTGTCCTGAAT	-0.4135222104368369	-0.1349526501750925	ilvN	3848986
GGTTCAGAGAGCGAATAAAC	-0.5475151372880998	-0.4293512269182216	hspQ	1027860
ACGCATAACTCCTCCCATAA	0.39794206139829225	0.4787809003163632	ryfD	2732209
CATGTGTTGTCAGTGCAGTG	-2.4332721393937566	-2.354998204829553	nadK	2748901
GGATCAGACGCGCCACATCC	0.4039159624429254	-0.03996022344246364	nrfA	4286168
ATAGCCTTAGGAGTTGATCC	-0.2868412023008277	0.006106525206773794	Only	3999282
CCCGCGACTGACATAACGAT	0.10277464476453724	-0.053106210636437064	yecR	1986389
GTTGTTTGGTCACGGAGGGT	-0.5546174202616903	-0.3236457861271008	topB	1844751
CTGGGATACAACTCTGGCAA	0.32645982236292914	0.23348128443768945	ybfQ	735886
ATGAGCATTGGTCACATACC	-0.2275102248268879	-0.30231427319626397	wecH	3723987
GTTTGTAGCGCTGATTCAGT	-0.32969061963336604	-0.1631601906030944	mngR	765008
CGCGCGTTACCCGACGTTTT	0.6907277515598451	0.05132052788672503	cysP	2541094
TCCGAGGTGTAGATCAGATC	-0.6492590424577378	-0.6022049182243494	nadR	4625852
TAGCTTTCACCATCACTAAC	-0.3121237928687328	-0.034545275913231865	glnH	846892
CGACTGCGCGTAATGTAGCC	0.4952311291888714	-0.07200229008017456	mdlB	470096
TGTCGCACCGCCAGTAAACC	-0.3569709797560564	-0.21121289291215672	yfaW	2359402
TTCGATGGTGTCAAAAGTTG	0.2440446256645359	0.022727065729806428	fklB	4426966
TAACTGACCCAGCCAATAAT	-0.23351395817236664	0.12317734668858192	ybgF	779366
TGATATCCCGCATAAGAAAG	-0.08466200185388839	-0.219691982581696	ymgJ	1222637
GAGGGTCATCATTCCGGTTT	0.08354838154318013	-0.4395036618713792	yfjD	2746873
CTTATCGAAGTGCGGTTCCA	-0.28414003124233433	-0.04618969097505676	sodA	4098874
AGCGTGGCGCGGGCGGCATC	0.3953101718752479	-0.4445478612142564	kbaZ	3277516
TGCCAGCGCGGGTACAGCAC	-4.184798673139339	-4.735761931463854	ybcF	549751
CCACTATTAAACGTCGTGAC	-0.13681575829621995	0.08793615451552439	thiK	1162553
TGACGTTAGCCTCCGACGGC	-0.16077049044794278	-0.492418277917682	ylcI	579535
GGCAATGTAGGTGACGTCAT	0.2570137406907411	0.017000454702849055	eutL	2554289
GGCATCATCGAGATCGACAC	0.7331935130658327	-0.07853328829056905	yciH	1340834
CTCCAGCAGGGCGTTCAGCT	-0.6020649237837015	-0.09626586774379907	yagI	287935
TTCGGCGTCACTAAACTTAC	-0.1847986731393384	-0.14093894524082384	yfjZ	2775247
TTTAACTTTCAGAATTTCAC	-4.014873671697027	-2.745221387055716	clpP	456359
CAGCAATGTGCCGATGTGAT	0.3774437510817341	0.0493087754054129	ycdY	1099183
CGCTGGCAATCCACGAGAGC	0.2265197115694779	-0.08540262343274685	yjiJ	4560546
CGTCCTGGCGATTTACAAAC	-0.20751874963942207	-0.10240236315836393	yejG	2276011
TTAACGCCACAATATCATTC	-0.6042315907051848	-0.3386343613917119	yhjR	3694152
ATCCCCCGCGGCAAGTGAAA	-0.2834676028727205	-0.3217328200467474	yihR	4068363
GCATATTCGCGCCGAGTGTT	0.02756608530018334	-0.02055813077286772	ldtA	2060891
CGGATAATAAACGACCGCAT	-0.0891240488371916	0.092559414584078	yadL	151744
CCGATGGAGTGGGCGACGCC	0.22929926567589096	-0.1407438282482506	ebgC	3223847
CAGCAGTGCGTCCAGTTTTT	0.2832284094640836	0.05303827780346992	ygbJ	2859634
TTCCTGCTCGGACTTATTTG	-0.8087218913677892	-0.32477953474410315	bssS	1120072
GATAATGTCGGATCGTCGGT	0.1034382274269372	-0.2659470170124243	ilvH	87466
CATCGTCCATATTTCTGGCC	0.27195062223442057	0.1362459489360035	yjfY	4422731
ATTGCGCATGGATGTGGAAC	0.2075187496394217	0.12437250451969595	yjaA	4211569
GTCAAATTCGACTTCAGAGT	-0.15689267656945394	0.22734478533827815	fhuE	1159786
AATAACCGGAGCGATTATCA	-0.4001638275818178	-0.1546778540712599	C0719	3119560
CTCATCGCCGGGTTCCGTTT	-0.8130781549676918	-1.0916360254987472	yeaG	1865561
GCGATGCAGTGTTTTGTCGT	1.2161930832052548	0.541547053872534	yhcC	3351624
GAAAGAGCCGTCACGGGTAT	-0.4161053714508393	-0.23215777795448256	flgG	1134290
TACTTCTCTACCGGTGGCGT	-0.7418551772906099	-0.5957396107014388	nadB	2708840
ATCATTGGCTTATCGTAAAT	-0.4853501574012964	-0.2687453038778673	rffH	3971710
GTCTTGATCGGGCGGAACAT	-4.003048236300237	-4.592232770136778	yaiP	382798
CGTGACCAGGGCTTTGGACC	-0.03912121794370327	0.16294497417677697	argH	4154989
CGCCAGCAGGCTGTCTTTCC	1.160505759837395	0.9245976859603641	phnN	4314062
ACCACTGATGCCACCGTGAT	0.5018610128548846	0.3546424313093381	yfiF	2716297
TCGCTCACGCGACCGGAGAC	0.5626137084619836	0.3853579785374277	dppB	3703321
GCACAGCTTTCCGAGGTCAC	0.7668414292024788	0.3473901283384073	eutC	2555208
TTGACGACGGCGGGTGTTAC	0.2852939044515257	-0.1735543841816879	yacH	131071
AAACAGTTCAACCAGTTCTT	-3.540942483364613	-2.38407152490425	ihfA	1793506
GTCAGGTTCACATCAATCAT	0.4234561488385704	0.057888661317329726	ygcW	2897935
CGACGCAATGTGGACACACT	0.2395045652294734	-0.06194412407481852	xisE	1200195
GTTTTGCCCGGCTGACGTAC	0.15826363483736805	-0.047217563553682014	leuC	80714
TCGGGTGGTGGGTCAGGCAT	-0.9941151115302288	-1.729114576557166	C0343	1407423
TTATCCAGCGCAACGACGCC	0.1417857841792456	-0.06762124249750046	yphE	2676320
GCATCACAGGACCGTAGATC	-4.5086882843599865	-4.304289420735534	glpT	2349317
CTTTCGGTGCTACAACGACC	-0.3020474311162377	0.05346664052580485	modA	794636
AGATCGAAACGCCCTGAAAC	-2.3667173444886758	-1.6916290515883938	sapB	1353068
AAAGCGGAAGACATCTTCGC	0.4717313466704967	0.17501831890348551	ppdD	117143
TCAATCAGCAGGATAGTAGC	0.70191404053155	0.18098914964653856	narL	1275034
CCAGCTTGTGCCCATTGTTC	-0.5194627559541622	-0.6781294007993729	pinE	1209341
ACCGCTGGTATCTTGATGAC	-0.1393472469978425	-0.11165420161099793	intD	564688
TTTACGCAGCGCTTGTGCAT	-7.447833078973132	-6.198846605149806	ftsZ	105436
ATTGCTCCCCACTCTGGTGT	-0.11186651057573573	-0.2826854664473315	gsiD	871861
TCAGCATGCGGGGGAGATTC	-1.8890545100556315	-1.5674921227588692	sapA	1355065
TAAGCAGAGAGAACGTGATC	-2.004889583124404	-1.2931704923136882	purL	2692818
CGCGGGTGATGGCGTTAACC	0.06484213097111069	-0.2966843073911137	hycB	2847680
ATTAAACAGCGGCGTGGAAA	-0.5194627559541622	-0.3536682692265519	ybiX	838195
AGTTTTCAATGTCGCGGTAC	-0.9929741901256592	0.08962478697755505	csgD	1102138
TCCGGGTTGGCCCGAATTTG	0.4844593897534741	0.11326956351938745	mlaC	3335772
AGCGGTAATCGCGTCCGTAC	0.5823957244757432	0.0419829729266048	fcl	2124756
TTCCATATCCGGGCCATGAT	0.03497487775353525	-0.022463181942181002	ycdX	1098215
GAGGTTAATGTGGTTCTGCT	-0.6813202516900363	-0.25031794661245943	rhlB	3963205
CAGTATCGGAAAGCACTACA	-0.4705531554732156	-0.3634651042404857	livF	3590819
TGTGCATTTGGCGATCCCAC	-1.0248654433541873	-0.8285671032471804	ydhQ	1743982
GCCAGCAGTTCGCGAATGAC	0.6240837186648593	0.14645073094205996	yidH	3854183
CGGCACTGGCTTCTATGTAA	-1.9275981812736356	-1.8695887745137203	matP	1017795
ATTAAATGCGAGGGATATTC	-0.7766562831988957	-0.24150898960464465	waaU	3796402
GTGCCAACGCCGATCCTGCC	0.6908098324656726	0.30892716091281125	cbrA	3867436
TGTTGTGTCAGCTCAATAAC	-0.20751874963942207	-0.4508211401100758	dapE	2589639
GTTTTCCCAGAAGCCGCCGC	-1.3616187839200518	-1.2195132333421692	purM	2619965
GGTTATCAGCATCCACCGTT	-0.8480272417955763	-1.0097833985495472	mnaT	1516775
GGTCAGGGCGATCACCTCGT	0.2897764317585005	-0.3308080575779251	ybbO	518141
CGGCCAGTGCCAAATCTTCC	-7.347070102038216	-5.412875553551627	ispD	2869862
CCGCAGCTCGCGCATTAACC	-0.6670921495201028	-0.581626964234609	glnE	3197410
CGAATACTGCGCCAACACCA	1.287558247564539	0.6872854302919145	arcZ	3348668
GGCAAGTCCGACACCCAGCA	0.7791668970796974	0.4763947336129168	yzgL	3561937
ATACCGCCAGTACACAGTCT	0.2919475308001276	0.27597702130018753	ydbK	1437690
TGCTGGGCATCAGTGAGTGC	-2.9242711229161187	-2.9311156862578267	waaC	3794057
GTCTTTAATGACACGAATAC	0.2502927733297136	0.2963983067455298	ysaA	3739478
TACACCCATTTTTTCAAGCG	-1.4450180633660783	-1.4260324567553329	relB	1643841
TCATCCATCTGGAACACGGC	0.0997625692835391	-0.35467268174772537	aceB	4214258
GCGACGTGCACCGGAGTTGT	-5.27790807753082	-4.983956345403552	rplN	3446137
CGGGTCATGCCTTCGCGAAC	0.12446300991186332	0.05160852338096045	mdtH	1123961
CCACAGTGTGTAATACCACA	0.4958942848157577	-0.1878690070966339	ydgK	1703474
TTTCCAGCCACGCCTGAGTT	-0.14862506058585326	-0.3246585591001694	menA	4118349
GGGCAATTCAAAGGAGAAAT	-2.8281051600912988	-2.0022076539005487	queA	424246
GGCGAATGCGGAGATAATCC	0.0617947190845185	-0.4309128926335686	yccA	1030418
TTATGAATGGCGTACTCTTC	-0.8121695852826902	0.13849293444042002	dacC	880545
CAGAGAAAGCCGCCTGTTTT	-0.26196653366179823	-0.20672155746005894	gltI	686608
TTTTCAGCGACCCAACGCCC	-0.19491871285978848	0.18613472165516146	nupX	2252014
CCAAATTTTATTGGCGAAAC	0.2736079400971945	0.10265653924755737	sppA	1847349
CGCCAGCGAAGGCTGAGATC	-0.6080566792231507	-0.17139375901895534	fucP	2933274
GGCGCTGGGGATGAAGAACC	0.33405115556835363	-0.24700048342775996	rcnA	2183977
GTTCACCAGAGAGAAAGGCT	0.012655846447207521	-0.2423588506048313	mltA	2945085
ACATCGCTTAAGATTTGTAC	-0.07200377898294086	-0.11271956799935268	yoaA	1890890
ACGTTTCCCCTGGGCGTAAC	0.08466200185388817	-0.06342639590036081	lgoR	4593566
ATCAACCAGCGTCCCAGACC	0.36697214756967894	0.15680160279803124	dppB	3702949
CCCACTCATCAAACATACTG	-0.3779420052883407	-0.30781916558981826	bssR	877716
GGCGTGGGAAGGGATGCACC	-0.5237951767501952	-0.9107308340030604	yhhL	3603062
AAATCAATACGTGGTTTTAA	-0.3185500620281658	0.11207347600987673	ycjF	1383545
TCAGCGGCAACAGCAAACAA	0.20187218649827976	-0.0143557893324342	yigE	3998998
TAATGTCGCGACCGTCGGAC	-0.6033083643249872	-0.7139820289173823	sutR	1504330
CGAGTCCTGAGATTCCGGAT	-0.0450688687592562	-0.052117905361181986	kefG	3479143
CGACGAAGGGGAAGGTGCAG	-1.7418551772906101	-2.4658638583995707	tatB	4020720
CACCTGCAAACGCTGATCGT	0.5616614693919537	0.10329108785222683	glcA	3118967
CAGTGCAGAGAGTTCCTGTT	-0.1247783186314857	-0.7119459559352384	hdhA	1695850
CACCAGTTCAGGGGTTTTAT	-7.27790807753082	-5.541199650527167	dfp	3810807
CATTTTCATCACGATGACGC	-0.12541766942452834	0.3993781679188151	yhfT	3504753
TTTATCAAAGCCTCCATTTG	-0.553969163660853	-0.08152244587499669	pptA	1531260
GCAAAACGTGGTGGGTGTAA	0.6702051808042115	0.3772878514375129	yohC	2223570
TCCATTTTTTCGATGAACTC	0.4285179356760036	0.277241229585286	ybcC	565389
GCGGACGATGGAGCATTAAG	-0.4619400251685076	-1.4269876776881192	fimF	4546141
TACGGGCCAGCAGTTCACGC	0.08124248131274125	-1.293695046497872	ompR	3534280
ATTCAGCCACGCCAGCAACT	-1.3546338681736485	-1.2232120195104372	allS	531117
GGCACACGCGTCATCTGCCT	-5.27790807753082	-5.246824685620945	ffs	475737
TCGAACTCTGGAACCCTTTC	-4.08946298811771	-4.304927640184514	serT	1030885
CCGCCGCTGGTGGCACAACG	-2.135889072658392	-2.0073693590163275	dapD	185636
GCCGTCCATCTGCGCAGCAC	-5.792481250360577	-5.687050516990622	tufB	4174248
AGCGATAGAGTTATTAGTAC	-0.500300498867268	-0.6826046119594298	tsx	430546
ATTCAGGAACAGCAAATTAC	-1.2130569331808518	-0.5172719151669741	fau	3054481
CTTTCAGCGATACAAAGAAC	-0.24816073413676776	0.1203044050669817	rbsB	3934415
GCGTGGGTCAGTTGCGGCTT	0.15678794751849212	-0.043194327215897436	dolP	3294526
TCCGGCAGCAGTTCAATATT	0.6133481021357297	0.08447229921195265	avtA	3738191
GCGCCTGTGCGCCCTGGATC	0.3862522086989937	0.11096956149371097	yhfS	3503365
AATCTTCGTATTCCGTCAGT	-0.7600597726682006	0.1912709264211252	hyfJ	2609641
ACCGGTTCGTCAGAACGCTT	-0.036457320378687534	-0.20173521972193853	frdD	4377371
GTGCTTTTTGGTGGCGTGTC	0.6034474259705613	0.21813375666749324	yegT	2177387
ACTTAAAGCCAGTGTTTGTC	-0.17564823435240007	0.3416386148345507	lsrK	1597815
GCCAGCAGCTTTGATAATTC	-0.29400376371965153	-0.6105674311865499	dgkA	4254686
CCATGACGAGAGAATCCACG	-0.17816057004062347	-0.2600618206286621	yifE	3946161
AGCGGACGGAAAATGACACC	0.19602311080159265	0.01639168931199331	xapR	2519728
GCTAATTGGCGCAGTGACTT	0.024211536276362192	0.2837216889762786	acrE	3412404
TTCACCAAGATAAATCACGT	-0.2088855854033279	-0.11089313473612973	yhbV	3300597
GTAGCGCGCCGACTAATCCA	-1.7686345084062105	-2.4911112714624077	tsaD	3208320
CAGAACGCGTGAATCAAACC	0.005025885740679081	-0.10791709507166347	yqaE	2794930
ATGCCTCCTCCTTGAGCATC	0.387892700312765	0.35015964363205065	gadX	3663642
CTGGCGGTAATAAAGAATAC	-0.542702941229051	-0.215914347370774	mdtG	1114194
CGAATCGCAATCGAAACAAT	-4.5580159967235545	-5.9114233024553124	msbA	966370
CCCGGCACGACATAAGGTTC	0.2925314996568724	0.18642214983890093	treA	1246170
AACCGGCCTTGTTTCATGGC	-0.017586200562049736	0.026759964518928925	xisE	1200144
GACAAATCCGCGTTCAAACC	0.7589286906495514	0.01814273112110465	pncC	2822226
AAGCGATCGGACGACCATCT	-4.91680938536278	-5.3836047088377645	ilvI	85650
TTGCAGGACGATCAATGTCT	-0.10621289790214106	-0.14366358257735967	asnC	3924617
CGGATGCTGTCTGAGATGAC	0.2374489557044697	-0.513392228482157	mlc	1665529
TTTAAGCAAAGCAAGCTGAT	-1.1276654419502072	-0.6363684223677537	rep	3959032
AATCAGCATATCAACGTGAA	-0.2702545049873848	0.037128922219740616	uspA	3638520
CGACTATCTGATGTCGCTCG	0.34696879274138714	0.2733959142866957	mntR	852721
ACAGTGCTTCGCCAATTTCG	-2.0198917464636503	-1.2540911097145158	iscX	2654732
CGCTTCCAGGGCATCGAGGG	-1.1896523288459082	-1.8978665870194504	ybiJ	837009
ACCAATCAAGGTGTGCGAAC	-0.17894959744265115	0.04690632730324573	pitB	3134035
GTGTTTCTGATACAGCTCAT	-0.15369605013327525	-0.2371542605001268	gudD	2916176
CTAAATGCGCCGCGCGGCAC	0.3438911913707077	-0.17869745021600114	fadH	3230474
CCTTCACCCAGAATAAGAAC	-6.879944091610918	-7.423322340986743	murB	4170204
TCACCGCCCTGAATCTGTAC	0.16631044715997034	-0.1220199185913381	slyB	1718048
ACGACACTCAACCATACCGC	0.040828212866833136	-0.3271983489684925	yodC	2026321
AGTATGGTGCACTTTGTGGT	0.2822291441557656	0.3576700408896196	focA	953229
CTCAACAGTACCGGAAATAA	-0.259049050279504	0.015487667034468132	xylE	4240189
AATTAAGTTATACGTATCAC	-1.7924812503605785	0.2237020511557404	yhiL	3631388
GTCGCTTGCAGAATCAGCTC	0.625205827332215	0.15251100329878775	ytfE	4429730
CCAGTAAACGCAAACAAACC	0.1684491849608296	-0.12380998865869107	ygdB	2960939
CAGGGTCAGCGGCTGTTTTT	0.08887425314080287	-0.02378059144007061	yeaO	1875190
GTAAAGCGCATGGTCATCTC	-0.2890330155522961	-0.4226594900488766	cusF	596553
GATCGGGGCATGATCTTCAA	-0.4357877373125392	-0.14626746483801534	yefM	2087676
CTCCAGCCATTCACGACGAC	-0.06046487216610519	-0.5448559611949069	yqjK	3248179
TCCTGTCGGGTAAACAGTTT	-0.679500045744712	-0.299255652902556	frvB	4089294
AGTTTTCCGCTGAAGGTTTT	-0.3100884832799697	-0.21311932865820996	ascG	2836332
TTTGTTGGCGCAGCATGATT	-0.39958663411907225	-0.29757968174702576	pppA	3112267
TCAGCCAGAGTGTCGAAATT	-0.13468586962797935	0.08286885915705189	yffS	2562735
AATGTCAGACGCAGGCTAAG	-0.14497728357070885	-0.1073629583101402	yjcZ	4327579
ATGAATGATAGGCGCAAAGC	-0.424749465860091	0.007934771058362156	htrE	154582
GCTGTCGGGCGTCCAGGTAT	-0.2930149699210283	-0.6111016637573237	yidR	3867250
GAATACTGCGGATATCAACA	-1.1226298520529092	-0.9533346439752316	yfjU	2769946
TTTCGCCCGAAGTTGTTTTC	0.3557282699260258	0.2523722378012219	fadJ	2456670
GTTCTTCATCGCTAAAGAGC	-0.2641022780057893	-0.4056951311910758	ynjA	1833857
GCCTTTGCTCAGGTCGTACG	-1.4967846970463954	-1.7010363046689507	infA	925491
TTTGACAACCAGCTCAACTC	-0.05935772248876602	-0.16376736952291826	ybbA	519037
CTAAGTTGAGGAGGGTGTTT	-0.11825141154233475	-0.10302029096484068	yejO	2285732
GACATCCAGAATGGTGCGTC	0.4091526108090724	-0.4343968804680858	cmoB	1951831
CCTTCGCCGCCATCCGCTAT	0.004784854073442314	-0.5715732995706861	glxK	541230
TTCAGGAAAGTGAGCGCAAC	0.06312884030424692	-0.30543298286907083	ybhH	800454
GCGTGTTCGAGATCGACCAA	-0.113988058913836	0.09105117378018934	envZ	3533335
AATAGCGTAAGGAATGGTTT	-0.4534796421142744	0.08413079251349688	yfcG	2419011
TATGGTCCGGCCACAATTTA	-0.2580085200931148	-0.06947906602261933	yphH	2681281
TTACCCAGCTGCGCCAGGTT	-0.8234341786894901	-0.12453530160475412	mntH	2510197
CGTTACGGGCCGCCTGAGTC	0.3846302916750035	-0.14564748414910622	fliC	2001448
CCTTTATGTCCGGTAGTAGT	-0.3671235658178101	-0.16558093989484934	ilvI	86189
TAGCGTTGGCGCGGCGTCGC	0.8763693188810159	0.061345657951988215	chaA	1270786
TTCTAACTCTACGCGGAACA	-5.377443751081734	-4.397543899795639	infA	925605
CCGACTTCGGCAAGCTTTGT	0.048175646847853804	-0.265312146209174	potE	717395
TGAATCGTTTGCTTTTAACT	-0.2726137778613069	0.10313437150857507	cadC	4359508
GGGCAGAAGCCAACAGAAAT	0.2029460198495978	-0.03737940959099584	yjiJ	4560450
AAATGCTCAAGGCGAAAGCT	-1.063927896010572	-0.20843690220387234	sbcB	2081264
CGGTTATTGGTCGGGAAAGC	-0.4069880266957496	-0.4771384977126372	dgoT	3869393
CGCCAGCAAACCGATAGACT	0.6218930932913793	0.4233734727030285	purR	1736044
TTGCCATTAACGGAGCTGAC	0.18596260627297445	-0.2013496476425427	nlpD	2866670
CCTAAAGGGATCTCAGGGTC	-0.3185500620281658	-0.012145890956667404	yagU	302795
CTATGCTGACGTCCTGCTTC	-0.00882242074633055	-0.050602355542777255	ydjH	1854692
TGCCAGGGTGATGGCAAGAG	-0.38672156466974505	-0.8964526979916508	gpsA	3781629
AATTCAAAGGGAGTCAGTAA	-0.35025892175550394	-0.2566999622172742	prlC	3643193
TTTGCTGTCAGCGTCCCCAA	0.033337734600622726	-0.09892507712174704	crcB	657059
GGGCCATGATGAATGTCGAT	0.616158477720115	-0.04401310989445206	yceK	1112998
GGCGCTATCGCCCGGTGTAC	-0.7791844277471203	-0.628951190648261	thiL	435331
GAATCCCCAGCGTATAAAAC	-0.2720074760911355	-0.154835511302003	caiC	37666
GTGTTGATTGCACCAGAGCC	0.15347890992653254	0.17074552908972684	rhtB	4007022
AACGGAAAAAGACGGGATGT	-0.5580159967235553	-0.06593325151093554	yeeT	2074890
AAAAGGCGTGCAGCGTGCCT	0.3752759143990241	-0.1845501764614388	aes	498334
TGCGCCTGGCTTATCCAGAC	-7.7279409981658675	-5.987737464303813	secM	108162
TCCCCGGCACGGGCTCTGGA	-0.2728724876335213	0.08362273885318583	ydhL	1723916
GGGTATTATCGCCATCTAAC	0.06549974476699427	-0.0967706554335286	mltF	2694522
CGTTTGCTGCCGTAGCTCTT	0.2366650952989382	0.07424440653732467	rbbA	3626864
AATCGGTACACTGGGTTTAT	-0.28179151201804803	0.03561511938544148	fucO	2930653
TAACCGCTTGCCCGCTTTTT	-0.4494915399453859	-0.17939523395609025	kptA	4559090
GCCAAATGAAAGGCCCTTAC	0.6602943239864059	0.013389201150469932	gdhA	1840979
CATTTTGCTGAATACGGTAT	-0.3782946476212273	0.014698956157258582	yhaV	3275736
CATGCCTTTGGGCGTGCTAC	-0.034905376519085866	0.03204190805236196	yieK	3897307
ATATCGACGGCCCAACCGTG	-0.9879523723817374	-0.9398570301497879	lpxM	1937803
TACGTCGGTATCACGATGAC	-0.06676041336199456	-0.21409097521733567	pepQ	4029798
CAGGACTTGGCGTACATCAT	-1.7722088553343172	-2.120075862475606	rnlB	2765341
TTTTGATACGCCTGCAACCC	-1.0555156561943722	-0.3825394751806691	ycjW	1381957
AGCTTCAGGTTTTCGATAGT	-0.2797308131376376	0.07777978842042478	mhpC	370956
CTGCATGAGGCACCAATATA	-0.8474074608641716	-0.9557167909037464	yobF	1905543
AACATCGCGGAGGCGACGCT	-0.2649690218233218	0.0718354735340272	ybhK	815648
CGGTGGGTTCGCGGCTAACA	0.3712651761526098	-0.01040837003172168	zraP	4199485
ACGGTCATGATCGGATGTTC	0.04200084971989049	-0.25878585853979275	yfeO	2508007
CAAACCAGCAGAAATATCTC	0.28379451692122704	-0.06655443345417689	yojO	2301752
CTGCCAGCATAATAATCGAC	0.2357156414700741	0.0912277053028896	yjcH	4283150
CACCGTCAATTGCGCGATAT	0.2050686584065331	0.01424922802594697	acrA	484485
CGACGCACACGCTCAAGGCA	-1.1842489703165746	-1.6353883971681298	lrp	931948
CTTCTTTGTAGATCACGTGC	-4.424749465860091	-5.121037119070456	rpmG	3809306
AAACACCGGAACAGCAATAC	-0.29487347930509633	-0.2069407537290855	yiaJ	3739891
GAGTTATGTGGACGACGAGC	0.2748740174411868	0.1665189600498045	rfbD	2109229
GTTTTCCACCGACGTGGTGT	-1.513366239012189	-1.1458093936987837	hycE	2843739
CATTTTCTGGCTATCGGGCA	-0.9153379981461118	0.007786494921093956	rutD	1070318
GTTCTCAAGGATCTGTTGCA	-0.9134966513219441	-0.7131695779545042	hslO	3527876
CCAGGTCAGCCAGTAAAGCC	0.2372660930334738	0.19808091330169475	mmuP	274836
CCAGATGCCCCATCTGATTC	-0.5478588816406645	-0.42984518995902576	yhgN	3573487
CGCCATAAGTTGGATCGGTC	-6.212020141874362	-7.1615364813502085	cysS	554272
GAGTTGATTTACCGCCGGTG	-1.1092869126353526	-0.9685590613404644	sroG	3182711
ACTTTCGGCATATCCCTGGC	-0.4167818990322347	0.050766810964500086	yafE	232066
CAGCGTCCAGGATTTAGTCT	-5.705769617167247	-6.012145890956668	rpsQ	3446385
TATGCCGGGCGGGCGGCGGT	0.06262680314539404	-0.2675853056709696	yoaD	1897993
CAATCTCCGGGCGTTAGCGG	0.33962228564676694	0.17397979043224376	yefM	2087565
CTTTCGCTAACGCCATTTGC	-4.792481250360578	-5.5651182774333865	lptE	671020
CTTCCCATACGCGCCCGTTC	0.2204000409361544	0.030095533882869892	ygeV	3003678
ACCGTGGTTAATGGAAGCAT	-3.000172622350597	-3.890361686927481	degS	3380797
ATTGATTTCGCCAATGAAGC	-1.0720037789829409	-0.6378465189898523	potA	1184081
CGCATCATCTGACGGTGGCT	0.6766329216740583	0.2109407679375148	yffO	2560302
GATAAACTGCGAGTATTGCC	-0.07688930698693898	0.0406965471462053	amyA	2004620
GTTGCGGTTAAAGCCCTGCT	-0.009105191237414044	-0.24280957443383436	rlmN	2641899
TGTCTTCAGTACGAATGTAT	-0.6929455768096637	-0.2540608705579341	ycjY	1389620
AAAGGGAAAGCGACGATGTG	-1.8304491005595984	-1.7401729035464308	sgbU	3747479
GTCTTCACCAACGCCACGCG	-0.6556645607302042	-0.9316167670295976	ecnB	4374647
ATGCACGGTCCGCTGTTTGC	-1.0275012800247754	-1.3410894658806904	rsmB	3433441
TGCTCCACGACAGGGAGGAG	-3.7743339036503194	-2.773207160740337	bolA	453977
CTGACGAAGTTCAAACGGAT	-0.6655691378783586	-0.08198884692678843	eutD	2571388
CGCATGCCAGTCATTGAACC	0.25381240191335697	-0.3726692311566079	glpT	2349852
TAATGGCTTACCATCAAGTT	-1.9978001583380849	-1.2747618817524675	purM	2619851
GCTTCACTGCAATATTTTCT	0.03670698825469665	0.05257846672445465	ydaE	1415918
TTTAGCAGCGGTTTCCAGTA	-3.325604819562116	-3.029679520741416	fbaA	3069130
ACGCAGTGAAACGATATCTC	-0.0891240488371916	-0.3053646459417487	manA	1686755
CCGGACGGAATCGCGTTACG	0.3303467444470889	-0.15597059164959282	yibT	3774301
ACGTAGCGAGTTCACTTCAT	0.3534164804352846	0.279724970074515	sohB	1327697
AGTTGTGGCGCGTCGTCTCC	0.2265197115694779	-0.02589452650006696	crfC	4325261
TGGCGCGGTTGCGCCTGTAC	0.5187996003272757	0.4986446970407896	ftsN	4120792
ATCCTGCCCCCCGGCAATAC	0.022045327099281087	0.019314035107575345	yjgL	4473570
AATGTCGCCAAAGAAGTAGT	-0.2517185535499572	0.06345812499608905	ulaF	4422073
CTACGTGCGGAAAAAAATCT	-0.5188083240804368	-0.3789282216282903	ybbD	528041
ATCAGCGTGGCGAGAATAGT	-0.4559063795088143	-0.7079924977972811	yhgN	3573446
CTCAATTTTTAAATCACGGC	-0.4705531554732156	0.08645266334019364	ymgD	1221667
ATGAGTGGATGGCGCTTTAT	-0.612107299687235	-0.14866755695850287	yghJ	3116446
AAGTCTTGTTCATCGAAATC	-6.5580159967235545	-5.985201228594859	ispU	195567
TCTTGCGTTGGGTCGTTAGC	-1.0872245159217102	-0.9849925204511472	yigZ	4030893
ATCATGCGCAAAAACGGTTC	-0.10377082480159294	-0.09327090683382598	ygjP	3234313
TCAGCGCCTGCAAAATGTCC	-0.9381587055562132	-0.4367610928760828	eutT	2571644
CTGGAGTTTACGCGTCGCTT	-0.015549248876727484	-0.3187235874223746	gcvA	2940345
TCGTAAACCGGAATAATTAC	-0.8104031583578404	-0.4535175380489738	eutH	2565895
CGAACCAAAAATCAGCATAC	0.026071878301890283	-0.257139741230248	yjiJ	4560337
ATGACCGTAAGCCCAGCCGT	0.5935771819464999	0.14059638274837982	kefF	47494
GAGTGGAATGTCCATCTCAC	0.4638585028992073	0.28403679109413904	rtn	2269077
TTCTGATGTTCCTTCCGGGG	-0.7725816929228733	-0.5779569163615406	flxA	1644479
GCCGAGTGAACGAAAGTTTT	0.2627320922050416	0.05272734910097099	lpxP	2493906
TATAACGTGCGGGCGTAACT	-0.5418118386430376	-0.0901933054631464	sbcD	416008
GTCGCGCGCGGCTCCATATC	-7.063010192741296	-6.287067363434068	cysS	554156
CTCACATATCGTTGGGCTAG	0.0783400905404188	-0.037364099314164616	Control	Control
TGCCGCGCCAGATAGCCCAG	0.5073078672575357	0.1714328967528196	bcsF	3696107
TCATTACCGACGAGGTGAAC	-0.3211755314349891	-0.5533495409517788	focB	2612217
CGCCGGTGGCTCTCTGCTTC	0.4763697922378225	0.2336363506553609	ymfO	1205170
GGCGCTGGGCAGGTCGAAAC	0.35826019452056057	0.01180120424727793	yebQ	1908902
AAAGGCGTAAGCGATATCAC	-6.198473610036415	-6.239276231299778	ftsA	104701
AGCAGATATGAGGTACCATG	-0.6244658389268971	-0.5101727549065428	yfjW	2771555
ATGAGTCCCAGGCGGTAATT	-0.612107299687235	-0.3844218840177776	ompT	584424
TTCAGCGGTAAGAATGAAGC	-1.1226298520529092	-0.9168405205453556	aroB	3516433
CAGTTCCTGATCGTCCGTCA	0.22089777944062194	0.3981870872516311	cnu	1703059
GCTGTTATTGGTGACGGTCA	-0.07663894776012592	-0.2045573151547858	yoaG	1877587
GGGTCGCCCGGCAAACCTTC	0.10044316608393776	-0.1723632835970309	ycbF	1003606
CATAGGGGCACCCGGGTGAC	-0.1744210614631908	-0.5219154132633747	tktA	3079584
CCTAACCAGCCAAAACCAGT	0.2687950900039844	-0.06907295904150301	yihS	4069689
GACTCGATGTTGGGATTGAG	-0.07062254858458017	-0.04041724254532375	ycjO	1371379
TCGCTACAGCGTTTGCCGTT	0.19241185724921367	0.15268823856201896	ydbJ	1439290
TAAACCGACACGCCAATATT	-0.18104653827823056	-0.03552039933047646	ymfN	1203910
GGGCAGGGCAGCCATCATCC	0.2144763003518626	-0.26867003036507986	ydcO	1503176
ACCTACACCAACAATGGTGC	-0.777981680665463	-0.4318485359040727	rpiA	3057286
ACAGGACGGCGCAGCGATTC	-0.028330826868141482	0.0012887524403866204	yegU	2178915
TCAGACCGCCAGCAAACACC	-0.41396962710684826	-0.8075458091771825	pitA	3636163
AACACCGGATGCCCGCGCAT	-0.19887983136554926	-0.3612803558088656	yneG	1610160
GTCAATCGGACGGGAAAGAA	-0.11147206216838756	-0.1132826023379585	serC	957409
CGATGCGATGCATGTACAGA	-0.13322496729210798	-0.9581951166854434	sspA	3375143
GATAGCTTTGTCATCACTAC	0.21225666864608472	0.2393928760392967	ydjA	1846492
GAGCTTGTTTGCTTCAATCC	0.16468255172916413	0.11656006078792047	relE	1643545
CTGCTCTTCGGGTGTCCACT	0.11188935326942452	0.25501030046841144	crl	257839
ATTGCGCAGCTTGCCAGTGT	0.016434185684643058	-0.06436595636397524	wcaK	2116145
TGAATGCAGAGTGCAGACCG	-5.51494727483167	-4.200769771452219	rplS	2742394
CACCATTGAGGCGATAGAAA	-0.37101748192230144	-0.28566442748430576	melB	4342682
TACGTTCGATGGAATCGACC	0.19035819848123905	0.06027558878130601	cirA	2244414
TTCGCCATCCGCCACATCAA	0.8249027280529555	0.18331420259278275	ugpC	3587130
TTTCGAGCGGGTATAGGAAT	-0.8648320945852621	-0.3474052533443865	fepA	610843
ATGCAGTTAAGAATGGCATC	-0.25642835012036835	-0.05232026847691662	ybiC	836367
TGCTGCCGCTGCCGTTTTCT	-0.05923874223708948	-0.15185931308236889	yfdX	2492306
AACTGTCCAGTTCAAATAAC	-0.6404781569155278	-0.23825045008321175	fucU	2937084
TGCCTGTGAACCGTACAGTA	0.714726092846133	0.6466793914048379	yoeE	2068438
AAAATCGTACTGCGATTTTT	-0.3261632461380409	0.2429951127194927	yphG	2680001
TATTTCATCACGCGATAGCT	-1.2360879018361928	0.0067864663262227065	yccU	1027251
AACGACGGGACAGAGCGTAA	0.16503541831790836	0.3872492937544029	yicH	3829210
TACTCAGACGAATCAATGTC	0.1629078629391305	-0.029315249803768317	rclC	317496
CGTGCGCTGACAGTCAATTA	-0.7841177774259516	-0.7979129054237972	nudB	1946442
GACTTGCCATGACGGAATGC	0.3828981811738423	0.06675242674919503	yhaV	3275558
CGATATCAAAGCCCAGCGTC	-4.457614099765718	-4.709987328267781	ligA	2527365
CTGAGCGTCGGTAATCGGCG	-0.006896950974192961	-0.14298926845389448	yicN	3840112
TCAAACACCAGGGTAGAATT	0.216856614218758	0.16318802366878993	fkpA	3474736
TAATACGCTGGTTGCCGCCC	-0.3839654704771249	0.1683186547081792	ydgH	1676934
CTTTCCGGTGCGGTTTGGGC	-0.3100884832799697	-0.3692995204305135	topB	1844928
ATTGGCAAACCAGCATAGGC	-0.24228416780009845	-0.25791282066692434	rnk	643121
TCTTCAAACACGATGTCTTC	-3.6225562489182663	-4.741498301012999	iscA	2657758
GCTGACGGTCAGGAGAGAAT	0.6225562489182659	0.4682669649611049	rfe	3966752
GAAATCGCGCAGTTCTGGAT	-0.606757539071527	-0.4542163489325274	preA	2234027
ACCTTCAAATGGCGTTCTGC	-0.6445825552482649	-0.9879815305829444	yoeB	2087386
CGTTCTCATGGCTGATCTCC	-1.2279828521991374	-1.7368218138035254	yehQ	2207233
CATGCTGGCGACGGCCAAAC	-2.456878218576139	-3.744307834599823	fucI	2934100
TCCATTGCGATATCAAAAAT	-0.3812858173761284	0.056125083026832064	soxS	4275190
TCCTCGTCAGCCGACAACAT	-1.470553155473216	-2.444402059105572	rpoH	3598725
AGCCAAGACGCATGTAGGTC	0.8436942023325229	0.51992505491481	ompC	2310610
CTGACTTTGAGGTCAGTAAA	0.05619473130264474	0.10380449637268828	paaZ	1451241
TTATCGTTGAAATCACGATG	-0.43355894799101424	-0.006401164609537435	ypfN	2590914
TCTTTGGGGGATAAGGCAAC	-5.207518749639422	-6.434520547591608	dicA	1646202
CATTTTGAGGTTTCGCTGAC	-0.7277109949703404	-0.1208110697748267	napG	2298274
ATCAGCCAGCGAGGACTTTC	-0.3959143545804599	-0.4000928316263324	xylE	4239614
ACCTGCGGCAGCGGGGCGAC	-0.1797737591565176	-0.3121321584609006	mdtC	2156507
CGTGGATCGCCATGAAGATT	-0.6275225018116152	-1.0274170152374158	nanR	3371954
CGCTTCACAATCTGACAGTC	0.47804769202014	0.10026665183043693	ykgO	311693
ACACACCCGCGTCGAGGATA	0.2779080775308198	0.05357829126616887	ytjB	4622555
CGCAACGTGCCTGTCGTACC	0.7189246433904971	0.2229695701723351	ycbF	1003441
TTCACTGGCAGCTTGTGCGC	-0.1803974066403328	0.04161575395709738	sodC	1722633
CAGGTAAGTGTAGTAATGAC	-0.9156926865414788	-0.8997154530568309	cvpA	2428661
GTTTCGGCAGGCCGTAAATC	-1.0136954804997451	-1.315103003394385	hemN	4050695
GAAAGATCGGTTAAATGTTT	-0.3830903142228764	-0.19243834727684767	dmlR	1879290
TGGCAGGAGACGTGAGTACC	-1.3925506434719428	-2.4724401075514346	ruvA	1943563
GACTGTCAGGCAGTGATAAC	0.1599240045003092	-0.8616108073110873	recC	2959080
TTCAAACGAACTGTAGTTGC	-0.01989174646365055	0.03109120288392897	yheS	3479994
CACTTCCCGCAAGCCAGAGC	0.17875975665799815	-0.2600618206286621	kefC	48401
GGTATGCGCCACCTCCTTAC	0.6022031869620983	0.4424521272413322	hdfR	3945755
CATCTTCCGGGTTATTGGTA	-0.4521746261583613	-0.4586792431647527	yajD	429979
GGTGACATTCCAGATATCAA	-0.10509768504493257	0.10376363782071274	panD	146564
ATCCAGATGATGTCGGTAAT	-0.197176805417963	0.08553898690630546	sufD	1759307
CTTCTCGTGCCGAGCGGACG	-0.173167244848645	0.2412567525530689	menI	1763390
CGCATTCACAATCACATCAA	0.17229026132844028	-0.04640388369178772	ymdB	1105090
GCGAACCGCCAGATTATAGC	-2.379405267415021	-2.8720824108231424	degS	3380356
TTTCGGATAACCAAATGTGT	-0.8654127728144294	-0.9799654852075176	yrfG	3527116
TGAGTATTGGCTTCGAGTTG	0.5294468445267844	0.14405815291664406	rsd	4194549
CGCCTGCTCGGCAATAAACG	-2.647430917557295	-2.542426953911169	pdxJ	2699660
CCGGAATGACGTGATACCCC	-0.0032594190629480213	0.019686439611679814	yccU	1027283
CCTCGCCACCGCAAGGCTAT	-0.5058862285854965	-0.5411996505271673	dnaQ	236450
GGGTTTCGTGGGCAATCAAC	-0.06571142330026047	-0.34918087823423805	yfjY	2774618
TTGGGTGTAAATGAGGTAGT	-0.8304491005595984	-0.8238278666512373	pldA	4003055
CACGGCTTGGGTGCATTAAA	-0.33304963172328084	-0.9585964226799336	rluB	1325257
CCGCCCCCGGGTTCGAACAC	-1.15808538983492	-1.208136996779055	pfkB	1804491
TTGCCAGGGGATGATCGTGC	0.0874422976476712	0.04165053661556395	ynfL	1667098
CCAGCGCGCGTCGGCAGGTT	-0.3527166651793576	-0.8264798245210796	pepB	2654346
ACTTTGGCTATAGAGTTTAC	-0.4391889845638808	-0.2855919010897152	btuB	4162447
TCTAATAGTGGACGATCAAC	0.04882100362036357	-0.07200229008017456	ydhY	1752492
GTCACGCCGATTAACAGCAC	0.6501990039873946	0.1208948266184553	agaD	3284227
TCCCGGCTGACGAGCAGCTC	-0.2918472684886936	-0.4179501104574742	citX	647210
TTCTCCTGATCAGGAACTAA	-0.5748898152879514	-0.19006542385703676	ygeF	2988616
ACGTCAGCGGGCCGAAGATC	-6.5039761570106664	-5.577999568730119	lptG	4486310
GCATGACTTTCGCTGGTAAA	0.12890891494305556	0.007210626221345828	uvrY	1993120
CTTGACGTTAATTACCGCAC	-3.7924812503605785	-3.486684401984173	kdsA	1267780
ATACGGCATAAACAGTTGTT	-0.3185500620281658	0.0974267000454756	fepG	619522
GAATACCGTAGATTGTCGTC	0.2972734023977508	0.024667269601782005	yhaH	3250488
GCATGACCGAGGGCGCTACC	0.02782166025184973	-0.4300191553566667	recT	1412544
TCCTCGGGCATAAGTAAAAT	-1.6050384876602362	-1.1425103734798239	yfiL	2739612
CGTATTCGAAGGTTACGCCC	-6.27790807753082	-4.933517073305928	fusA	3470943
CGCTGTGAATAAGATTATAA	-0.8104031583578404	-0.2832635672651631	lgoR	4593470
CGAGGGGAGGTTGGTATAGC	-0.2757369784891929	-0.9672218137413392	xdhA	2999380
TTTGCCATCCGGTACATCGC	0.01754780599535155	-0.14818721900138088	ybaA	476024
GGCGTTCGGCGTACACAGCC	0.5138499894757658	0.10976057285749953	ypjJ	2775046
AAACCGCGCCCGTGGGTGTC	0.3112666744772508	-0.05793522132323092	umpH	699114
GGCCCATGAACAAACTCACC	0.35877645684165005	-0.06867081407976637	ytjA	4610277
CAGACTGAAACCTAGTTGTC	0.6267440458816993	-0.2179363449559856	zntR	3436989
CGATTATCTCGACGGCACGT	-0.1247783186314857	-0.18788515464954325	yffO	2560397
CCCGTCCTGCGGGCGAACAC	-1.3404926149088428	-1.5011839716792883	yhdH	3401928
CACCCAGTGCACGGTAGAAA	0.34267833292105765	0.4239944541140535	dmsD	1663046
GACCACATTTATGCCCTTCC	0.21440513522466187	0.0764258627547929	queD	2890299
GTGGCCTGGGAGACTTTATC	0.5834653827736378	0.4138821526343717	cytR	4122380
TAGTTGGCGCTGCGCATCAT	-1.1638918172391641	-0.4856236867520707	yiaN	3743197
ACCATTTGTAGTCGAGATTC	-0.012347797037998376	-0.15839135687032435	ybhR	824831
TCCGGGCGGTCGAACTGCAT	0.0828392662470705	-0.0151799510463011	panC	148618
CTGTGACAGTTCGATCGCTT	-0.03360087976593151	-0.23579907881649576	ilvA	3953773
TGCTCCAGGGCCGCCATACT	-1.453065728744375	-1.7097357386282108	hyaF	1036075
TTGGTTGGGGAGTCTTGCAG	-0.3100884832799697	-0.5053651484827999	yjiK	4561194
CAGGACGTGGCGGGTGATAT	-1.4271605599598352	-1.7801599213821038	ppc	4150337
TTTATAGGTGTGAATATATC	-1.0657114233002605	-0.08793198629281884	rhsC	732857
TTCCGGGCGCAGGGCATAAC	-0.6393722196893589	-0.30257733549817545	sbcB	2081208
CCCATAATGGCGTTGAGATC	0.12380804325019	0.06495634329876787	yphF	2676732
TATAACACTCCCTGTTGGCA	-0.8968179101753136	-0.1878319307813809	gadY	3662907
GCTTTGCGTTCCGCTTTTAT	-0.3070544231903365	-0.4727748232973806	waaC	3794210
AGTGGTTGAGACATCAAACC	-0.17878703109610586	0.2592994291930548	rutB	1071968
AGTAGTACCCGTCGTTGCCT	0.1179152887494761	0.3267041657331242	gfcA	1048879
GTGGTTTTCGACCGCGTTCT	0.17330303430150915	0.1773154619713393	galF	2112173
ACATTGCTGAGCTGCGTGGC	-0.4985675316428122	0.0222673524969228	kefG	3479096
CTGGAATCTCCACCGGATAC	-0.1885177877093661	-0.3729515707939551	sufC	1760282
CCATTTACGGTTGTAACGCT	-2.170992873614308	-1.86462027447092	nuoG	2397550
AATGAATTGCTCAAAGTGAC	-0.6631982334156118	-0.15116262819299064	pheA	2736141
ACCACCAGGGTGAGATTTTC	0.3052316875835188	0.12403326483446266	malT	3551555
ACAGGGAGGAGAGGCAAAGA	-0.05160060619098883	-0.5306752683886874	bolA	453968
CCTCCGCAATCCCCAGAATC	-0.24274723795040354	0.06748494519137971	livH	3593641
TTAAGGCTACCAGCCATCTT	0.07327065045445402	0.08261723627492512	yjjP	4600537
TTTCCCTGACAGCCTCAGAA	-0.6225562489182657	-0.17302392308041126	yaeP	213997
CCAACCGGGATGTTGCGCAT	-4.6404781569155285	-4.797641379050532	rplB	3448993
TCCAGTGATAATCCGGTTTC	0.020627198927323454	-0.05732363723469036	rna	643857
AGCAGAATGCGTTTATAGAC	-5.345022273389357	-5.418456585814926	pyrH	191874
CCAGCAACCGCCAACGTAAC	0.8135902769546761	0.2647840512386499	astE	1824720
ATGGTGGGAATACGTCGTTT	0.030640987555342388	0.2483059318811132	srlE	2824655
AGCCAGCGCAGCCGCCGTTT	0.1286232044676412	0.1014453778156661	bdcR	4472462
CCGATCCCAGTTACCGCTAC	0.42316205138756935	0.10424263160158342	arnD	2368384
GTAGGTTTTTACGCTGCCAT	-0.6961128558883467	-0.18546957853666912	cyoD	447236
AGCTGCCCGGCTCATTTTCC	0.3286278351386882	0.2578197348802877	fumC	1683677
CACGATCAATATCACGTACC	0.1644500277475358	-0.09266959598177882	pheA	2735899
TTTTCTTCGGTCGGACTAAC	-0.8664818318043549	-0.8325333771666217	pstS	3908825
CCTTGTTCCGGGCCTGACAC	0.3368017665843883	-0.11688999583155245	rlmC	897880
GGTAACGAAGAAGTTGATAC	-0.33304963172328084	-0.3163162443286115	cyoB	449252
TGTTTCAAAGGTAATCTGAT	-0.24677818008664895	-0.05975680216356516	cheA	1972693
AGTAATATGGTCTGTATCAT	-0.5875925766634348	0.0305771339012384	yfdF	2461276
CGCCCATATCGGGTACGTAT	0.4126331795440343	-0.012297442513179655	mazF	2909102
GATGGTAAACGTCTTTCCGC	-0.03991880114335333	-0.3270040873895633	ykfB	265178
GTTACCGTTAACGATGGTCT	-0.8241901100879163	-0.9893303002031222	nagA	700863
ATAATTCCCGGTAAGGTCAG	-0.8023967192256607	0.029691013479570705	modB	795512
CCGGTCATCGCACCCGTATT	0.4321496431718692	-0.057554050741163036	sfsA	161378
TGGAATTGAAGCTGTATCAC	0.03869968542327884	0.12416963186900708	yciE	1312884
CCCGTTTCATCGCGGCACTC	-0.10412560041899344	-0.2197536055549283	renD	567408
GCGTTTGGTCATAAAGTTGT	-0.3393086221949633	-0.6096246052588772	phoE	258903
TACGGTCCGCTGCGGTCCTG	-0.059126909746750826	-0.4814477536180258	ypjJ	2775067
AAAACGCAGGCTCAGCGCCT	-3.028548608594103	-2.3228941867139623	hscB	2657437
GGTATTTTTCAGTGGATGAC	-5.660377714353232	-4.603994777263063	yjgW	4497756
GGAGCCAGGGTGTAGTAATC	-6.792481250360577	-6.091209552413899	holB	1155205
GGGCGCAGTAAGAGACTTGT	0.03436984732282311	-0.07868638374790904	fetA	515383
TCGGTGACAAAGGCGTTACC	-2.4889316847880703	-3.263707323839639	hisD	2089746
GTTCAGCGTACCTTCCGGAC	-2.597085561402148	-2.9469989429506733	dapB	28613
ACGCGCAGAATTAAATCCAC	-0.2481607341367679	-0.0672292590578144	yfcR	2449510
CTCGAAACTGCGCGAAATTT	-0.13426976760878315	0.21119598420864485	nemR	1724568
GGTTTCCGCAGGGGTAAGCG	-0.2315460202858717	-0.2531257734182858	lsrA	1600020
CTTTTTCATAGATGCCAAGC	-1.6511254011150367	-0.6972897014954604	ulaE	4420887
GGTACGAGCAAGCATCATAT	-0.3640140941845388	-0.5695737219243378	micL	1956517
TCATGCGGCATGCCAGTACC	-7.746677560747452	-4.7810266651996365	rnb	1346097
GCCACCGCCGCCAGGATACC	-2.0243547247079112	-1.8569755184329344	hcaB	2669684
TTTTCAACGTCACCTTAAGA	-0.7447281189122099	0.08377852904186799	yffQ	2561863
CAGCCATTGCGTCGCCAAAT	0.42617757391508093	0.04524291704951389	ydhR	1744763
GAAGATATGCATGCTGGCTC	0.19064493107502575	0.2519615495423526	cof	466929
GATCTCTTTTCCTTCAGCCC	-0.3485626310946055	0.3727786708793997	xdhC	3001717
TCAGCCTGCAAGAGAAGCGT	0.43277082511511056	-0.115627856711636	pldB	4007974
CACGCGCATGGCGGTTTCGC	-0.8356388327767069	-0.9118272078663754	aroC	2445110
CATATCCGTGACGATGCACT	0.05159323706134344	0.032841563816642605	ygeX	3006008
ACTATGAGCTGCGCGCTTAT	-0.007926197676111801	-0.001347342106427396	ptrB	1926511
ACCTTGCAAACCGTCGCCGT	-0.4270515168366293	-0.16059401686619554	mhpE	373232
CGTTTATTGCGATCGCGCAC	-0.22411526017011685	-0.4776817346607841	truD	2868774
ATCTTCGGTGCTCATGTCCC	-5.962406251802889	-4.976917402645686	dnaE	205974
GATTCGATTCCACAATTGAG	-1.0695908414060946	-0.9184190266623778	yffN	2559861
CATGATGGTGCGGTTAGAGC	-1.2677362724735288	-0.8802045718445907	adiA	4337850
TCGAATAACCTAAATCTAGG	-0.7977178987267255	0.18301566249013604	Control	Control
CGTAAGAGCAGTTCTTATCA	0.07572887708388087	-0.061295608449783774	yhfL	3497548
AATTCCTGACCGAGGGTCAT	-0.4965483640061605	-0.04997969906315558	aspA	4365759
ACTCAGCAAACGCGCTGAGC	-0.3681914378435377	-0.07200229008017456	xerD	3037554
CGCCGACAGGCCGAAGACGT	0.8050812871402115	0.14366342049848654	yagG	284723
TTCTTCCGTGATCGGTTATC	-0.4461689968462567	0.22331227052470126	yegJ	2149404
AGCAATCGGATCGTGATGGA	-1.3348980561156496	-1.0643859536616338	cusF	596518
CCCCTGCACAAAGTTCTCGC	0.4275672305075706	-0.020962303640307045	yqiK	3191353
CAAACTGGTGCTTACGTGTC	-1.5974652679554353	-1.8484135049295105	pta	2413102
GAAGCGGTCAACACGGCCAC	-3.5294468445267846	-3.460152016902263	rpmE	4125194
GTCACCTTCACCAAGAATAT	-0.02576831280031988	-0.09980871303776118	ynfE	1657079
AGCCAGGCGAGCAGCGTTTG	0.41418429789675226	0.1970032947304252	menE	2372836
AATGATTTTCTGGTGCTTAC	-1.0691905930914487	0.05357829126616909	insA-7	4516699
GTTTTAAGCGCCCCACATTC	-0.17799966271936696	-0.1237210033383348	cmtB	3077142
ATCAGATCGAGTGCCTGTAC	0.19301917994430684	0.5178416212630537	tam	1605638
ACCCATCCGGACATAATCCC	-0.1315698964061236	-0.05276313385445697	ybeR	676281
CATCCCTATCATCCATGAAC	0.4987033210956762	0.28812910763654265	gatC	2171879
CAAGAAAATAGAGCACCGTT	0.11440934524794065	-0.1442783345365578	rsuA	2278263
CCAGCGCAGCTCCTTCAACA	-0.3677423498894404	-0.6187384076493664	ydfR	1638258
TTTAACAGCGATTCAGTGAC	-0.15407949067796156	0.049915077175584084	astB	1825854
CATGCCTTCCGCGTCGCGAC	0.585589922564318	-0.07070875218173422	mntR	852783
CAGCGAGAACTGAGGAATAC	0.4363374401353026	0.1050779308423242	yedE	2006717
CTGATGCTGATTGAAGGTTT	-0.13536896388358666	-0.1493937310478226	phnC	4323154
CACAAATCAGCGCATGAGTC	0.04302471201117508	-0.24964520468332385	hydN	2835684
TTTTGTCGCGCCTTCCTCAC	-0.2804502720932731	0.004544544572480991	ygbN	2863782
CGACGCCAGCGCCGAAGAAC	0.3280315569566561	-0.06890689342510213	carB	31731
CCAGCGAATATGGAACAACC	-0.3573425450252247	-0.4474829518460421	yeeR	2072967
TTATTGCCGCTGAACAACAA	-0.32433241462217177	-0.041752353041991215	amiB	4394305
CTGCTCGTGCCCTGGGGTGT	0.04013658286931432	-0.21673058221058872	cysN	2873104
CGTATCGACAAAACCATGTT	0.5123733311678429	-0.15282229749277798	mfd	1171896
GGTTTCGATAATCATTTGGC	-0.2856354395554305	-0.543721178930799	yjfI	4408296
AATGTGCTGCACCAGAGTGT	-0.4572563328597578	-0.3683319785791498	glgC	3567119
ATCACTGCGCAAACCGTGCC	0.5416215584728865	0.5054096399210928	yfiH	2732768
AATAAATGCAAAAATTGTCC	-0.9086742678651007	0.07718971185219292	kch	1307878
GTCCATAAAGCCTTGCGGTC	0.5872909190990685	0.035141999678758314	tauC	386392
GCTGCGGTCGCCCAGACTTG	0.06754274020996598	-0.26074679527997635	greB	3534941
AACATCAGGCGGCGCATAAA	-1.04674544656664	-0.5144293924670775	allR	532545
CAACGTTGGCGCAACGTTTC	0.05906631140416541	-0.2745915618135547	mazG	2908261
CTTGCTGCGAATGCCTCTAG	0.1612035567268817	0.04214819413189375	Control	Control
AGCCACCAGGCCCCCAGGAT	0.239190969957966	-0.10074384861340246	ydcV	1513531
GCGGGCCTGACCATTCCATC	-0.16050668335401666	-0.2465928035790527	yphB	2672097
AACCCCGGCACATTCATGCC	0.2179857486904906	0.07707249160873353	yggP	3075279
GCGATCTTTGGTTTCGCGAT	0.4897006657340279	0.1730323567976524	lplA	4621722
GGTAGAGGTGAAGGCTACGC	0.35328988937295724	-0.12616215124832353	ykfG	263856
GATACTGGTGAGGCTTTCCT	0.2906599849396678	0.24785445478749304	mdlA	468694
TCAGGCACAATGCGATCGAC	-0.289106284135684	-0.5547650118841323	rpe	3512862
TTCCGCTGTACTCACCGTAT	-0.16716101202328104	-0.26439179005251023	elyC	972224
ATTCGCAAGCGCAGTAAACC	-7.107177776016863	-6.67311132603275	holA	670452
GCGTAGCGCAGTCAGCCACT	0.4985858808220238	-0.00816936420862735	pdxK	2534937
AAAATGTCTGGCGCTGAAAT	-0.7268929087330013	-0.05771806407392688	astE	1824361
CACAGCAGCGGCGACATATT	-0.2302388261395054	-0.3777500304310092	phnF	4319839
CTCCATGCAGCAGTTCATTC	0.5422141406006622	0.34151452116042597	intR	1410855
GAAGATCAGCGGACGGATAT	-0.3817438885153596	-0.2412886523276968	ilvE	3950791
CACATAGGGACCAAATGTGC	0.18247362019309432	-0.04768637560129818	yfdE	2487039
TATCCCAGATTATGCTGGAT	-5.401290493036102	-5.646249985865183	dxr	194008
TTCACGCAGGATCTCGCGCA	-0.08189107161866938	0.026278712908345936	nikE	3616119
TTGATCAGAAGGACGTTGAT	-0.4705531554732159	0.09945532853783147	ybhC	806422
GAGTTTTCGCTGCATCGCCT	-0.33728662460975145	-0.33000340292548946	yedZ	2038914
ATCTTTAATGGTTGCCGCAT	-0.7447281189122099	-0.061055491437613914	dcuR	4347795
CATAACCTTTATCTATGAGG	0.07964392708726377	0.015383251282557575	ygeP	2995882
TATCAGACGCGGTAAACGCT	-0.7842136343769777	-0.5242675847923294	fadJ	2456724
CAGGTATTCCGCTTCCTGAC	-0.006606055713425762	-0.18525461741336915	hsdM	4580941
CTTTGCGAAAGCGGGATCAA	-0.02656428249824283	0.34139181044751665	emrB	2810990
TGCGCTGGAGCCTGCGGTGT	-0.005233901751548808	-0.7088656096402951	minC	1224973
AAAAGAATCCGCGCAGCCAA	-0.7824971617879559	-0.14530854486858824	ygaM	2798389
ACCTGCGATCGCCGTGGCTT	0.004355799783026804	-0.2239690705829284	yfaA	2333993
CATGCGGGTACGCTGGAAAC	-0.7543461214738068	-0.5715732995706864	mhpB	369938
TTCATTAATACCTTTGAGAC	-5.1144093452479416	-4.0131716251206635	coaA	4172937
GCCAGTGAGGCGCGTTCGTT	0.5650707542575057	0.2761315930087929	yihP	4064764
AACGACGCGCGGCGCGTTTC	0.12253722613134065	-0.06726846219475502	mdtH	1123380
ACTGTGCAGGTGCAGTGCCG	0.07488098106130292	0.11874220129669875	murR	2543381
CAGAGCAGGGGAACACCGGC	-0.7500131092201209	-0.711375939410209	ydjM	1808596
CACATCAGCGTTCGCATAGC	0.09675067875143363	-0.17996429568211825	rarA	937429
GCTGATGGCCTATCCATAAC	0.5814775472869995	0.5277447565062674	ccmA	2295433
ACTTCCGTCCCAGCCGTGCC	0.5243936168004988	0.31568548807913177	insAB-1	19907
ATTTTTCCTTCCCATTGTCC	-1.3954517002324969	0.06454328910057283	xylG	3731158
GGTAAAGGCGGATCGAGTGC	-0.5624756449142552	-0.3839462963949147	dpiB	651764
CTTCTTCAAAACCATAGAAT	-0.5100815196598534	-0.12465173927205643	hemF	2551643
CACTCGCCCGGTAGCAAAAT	0.20968984868104898	0.2561393355299091	ybiC	836496
TCTTTCCAGAAAAGCATGAA	0.11440934524794022	0.16156551505500685	ybfA	728439
GATTCCCCCGGGGGGGATTT	-0.6376631413084741	0.021981811666522463	ydaU	1419662
AATCAGCGTATGGCCTAAAT	-0.4274844335813297	0.07173318738127499	dcuS	4348457
ATGTTCCCGGTTTCTGTGTC	-0.2163696672216875	-0.02909178301065718	elfA	997494
TAAGGAGTGAGTGAAATAGC	0.021843226511867764	-0.035622137283403583	evgS	2483058
CATTGAAAAATAAATCTCTC	-0.8075881427507863	-0.4761537344920036	ymgC	1215987
TGCTTCTTGTACAGACCTGC	0.4305318184540972	0.2383555661507444	fixX	45593
AACAAGATCGCCACATACAC	-0.182308186842142	-0.10472220165558456	alaE	2797466
CAATTGCTGCTTTTTCAGTT	-0.5111951399705617	-0.4994235138148507	yfdK	2469307
TCCAGCAGGGCAAATTCTTT	0.07775087466909225	0.2255132870330909	qseB	3168304
ATGCGGTAGGCATTGTCCGC	0.3179427393330725	0.1981290810075196	hofB	116787
TAATCAGTGCGCATAAAATA	-0.8331232348579237	-0.13484072919252346	ydgU	1669840
GGGGCGGTAGGTTGTGCACC	-0.19637819203422147	-0.3019159515431571	katE	1812024
TACGAATGAGCGGGTATTTC	-0.2987868072067359	0.1548616271033505	narZ	1540288
TGGGTACTATTAAATTGATG	-0.26196653366179845	-0.04835414856242615	yqcC	2922042
TGTTTGCTATCGCCAATAAT	-0.02576831280031966	0.5804297938743637	truC	2921284
AGGTGCTTCTGGCTGAGAAG	-0.2694132833653642	-0.5142021203415438	yoaF	1875498
AGGTCGACAACCGTCATTCC	-2.4388442957458776	-3.0793679397693823	rlmE	3325533
ACGTAAAATGGCCCGCGCAT	0.2850281168603375	0.10935825968119196	nac	2059758
TGAAGTTAATTCATCCCTAG	-0.4705531554732156	0.31739538804057005	Control	Control
ATCATCGCCAGCGTGCGATT	0.04791393346103368	-0.006833340046427772	puuR	1360242
ACTGGAAAGCCAGATATTCC	-0.2054110866774307	0.3149888903334748	lldP	3775454
ATCCGCAATAACTAAACGCC	0.10982207575228853	0.024416223299493774	bglJ	4602443
GGAACGCTGACGATGCGATC	0.4871005538171893	-0.16040880943904856	gntX	3543241
CAGATTCGTGCGCGTATTGT	0.2153382540987212	-0.10899741152848176	uxaA	3241104
GAAGGATAATCCGCCACCAT	0.2628011851406116	-0.15543994377056947	yjtD	4639365
TTTGGTGGTAACGTACATAT	-0.2448403758451566	-0.3100647479678525	bglH	3899612
CATCGAAATGCCAATGAATC	0.3961803136633202	0.24704258361193746	allD	545196
TCTGCCAGCGCCTGAGCAAT	0.0263845974507162	0.09378755379239756	stpA	2796163
ATCATTGTTTCATCGGTGAC	-0.15219167560604574	0.10851777317860356	exbD	3149025
ACCACCGGCTATAACTGCTT	-0.15705368265643405	0.1983696170417928	yafU	239026
AGGCTGGGCGCTTCGACATC	-0.2823494203125947	-0.4943081732439831	yjiR	4569255
GTTTTTTGTGCATGAGCGAC	-1.8786378941102928	-0.4508211401100758	efeB	1082690
GCGCCCTGGATGTATTTACC	-0.5703759039511322	-0.6979251542146205	gldA	4137034
ACCTTCGGTACATAAATAAC	-0.6835468788074138	-0.3343229195071251	menI	1763448
ATGTTCGGAACCCATGCCGT	0.2075187496394217	-0.05446389103197236	fadL	2459626
ATATGGCAGGGAAGGGACAA	-1.0066060557134258	-0.6859059750496811	gltK	685127
ATCCGGACGTCCGGGCAGAC	-0.13797781638634501	-0.12132110770778448	vsr	2028809
AGGGCGAAAGTGAATTCCAC	0.1413763928482097	0.06783698517284642	eutH	2565568
TCGTGCTCGGCATTGATGAC	-0.07627421636116938	-0.3338056523473223	bcsE	3695961
TCGGGCAATACTGCCAGGAC	-4.91680938536278	-4.03624156657413	cdaR	183227
ACCCCTGTCGGGGCCGTATT	-0.10018470552810044	-0.13663624285413756	rhsD	523339
GAGTGTGTAGCGGGTTAATT	-3.403438959614679	-4.200929919650297	hflD	1191604
GAGCAGAGCGCCGATTTCAC	-0.4994323757388569	0.12041597162409068	cho	1821796
GATGTTAGTTGCCAGTCGTC	0.4533926043150327	0.3784111627221982	yciX	1333406
TCTTCGCGGCAAAACGAGAT	-0.7184806689168013	-0.5330991517560505	ybgE	773637
GAGGTGTAATCCATTTTGCC	0.04291830287697063	0.0314829947123394	flgF	1133227
CGACAATCAGCAGTCGTGTC	0.8877473290791082	0.2852729277826418	hycI	2840901
GCTGATTGCTAAATGATAGT	-1.6295426792343726	-1.337601359339355	waaB	3801763
TTTGTTTAGAGGTATCTTTC	-1.9913853187746564	-1.5891459290186358	aceE	123665
ATCAGCTTATCGCGGGAGAG	-0.3692698196360342	-0.9439063478952916	ompR	3534069
CAAGGGTTTGTAGGTAGAGT	-0.7924812503605783	-0.8969187550157833	aphA	4268078
GCCGGTTACCAGTTCAGTAC	0.3550063619619788	-0.09618614437701044	gpp	3961825
CGCCGCGATCGGGATCGTTC	-2.3323558615531965	-2.465704664463863	rnt	1726614
AGTGATTCGAGACGAAACTT	0.1884099266917174	-0.03653602418121205	ccmG	2290848
CACCAGCAGCTGAATCGCAC	0.4760075855653239	-0.24447115834538705	rsxG	1708530
GTGAGCGGAGACGCGCAAAT	0.007776496756713769	-0.07805506004689644	ampD	118936
AGAGTGACTGACCAAAATAC	-0.3100884832799697	-0.257819136129024	yoaA	1890552
GCATGGCGCGGATAATTTTC	-0.18914022032456745	-0.5410712111733422	proC	404530
TCCAGTATCAACACGCCTTT	0.2779080775308198	0.2319900433245439	ybjC	890158
TGCCGCAGGATCGACCTGAC	0.22572636811209845	-0.04505427880570534	kdgK	3677555
TACCTGATCCTGAGAGTTAA	-0.03665662894305588	0.5729130949704022	fis	3409337
ATTCTGTTGTGCGACGGAAT	-1.1810465382782311	-0.056573357017097536	lamB	4246263
CTTTCAACGTATGGAATTTT	-0.3216897695587331	0.13752550116257578	galE	790882
CAAACAGCGACGGCAGAAAC	-0.1157104381131182	-0.2698064992481778	yggD	3073110
ATGCACCTGACAACACCACG	0.13368840774282353	-0.2492152553310464	rdlD	3698179
GTGCGTATTGCCGGAACGTA	0.6119090047187572	0.2091136720248377	yjjQ	4601862
CCTGCGGAGGTTCCCATATC	-0.7220919224691802	-0.7120070043035992	bepA	2614216
TCATAAGGAACGGTTCTACC	0.4888048600294386	0.4008144692214537	mdtE	3657412
AGAATCATAGCATCTGTTTT	-0.40388211582792793	0.06786175693498286	wcaD	2128305
TCGGCTGTTTTGCCAGTTTC	-0.2283522530565876	-0.5960678614914345	fcl	2124879
CGCCAGAAAGGGAATGTAAT	0.16965920581340255	0.02162848705638853	ybaS	510945
GCAAAGTCCGCCAGTTGTAA	0.07376736075059487	-0.162226912369698	hofB	116496
TTCCACGGCCTGTGTTTTTC	0.41822936592823456	0.21844042287785514	eutP	2573394
AATGCCGACAACAGCAACAA	-0.03445404066654234	-0.04019183905437407	yhdX	3418239
TACGCCGTTGTCGAAGGTTT	0.4200356278062023	-0.07657632094967304	adhE	1296632
ATTGCTCGCACGGTACTTCC	0.03302101840728544	-0.2205424127390634	cyoA	450635
GCCGGGCCGATAAACTTATC	-2.219902474095254	-2.1020880162694655	sdhB	757408
CGCCTTTTTCAATCACCACC	0.15259253913582824	-0.12616215124832353	yggU	3094597
GCCGATACGAGTGGAGCTAC	-0.4005905973056485	-0.6665488901756726	yfiH	2733004
CTGAACGATAGCTGGGGTTA	0.15259253913582824	0.019786972348620813	hdeA	3654528
GTTGGCATTGAGCAGGGCGA	-1.2461215888631694	-0.43358229649836055	purM	2620166
GACGGCGCTGGCGGTGAACC	0.5206229941397782	-0.13547418476401266	rutF	1069480
AATGAAGAATAAGCCTGTAC	-0.4943998974275834	0.3544261189855369	yhiM	3633303
TGTTGAGCACCAGATTGAGC	0.01754780599535155	-0.2336356203945058	phoR	417602
AAATTATGTTTCAGGGGTTC	-2.444557946940271	-0.6988354851635168	yoeB	2087354
CCGGGCGCAGCAGCGGCAGC	-0.14016348183765714	-1.036536024181212	afuB	278308
ACAACACGCGGGTGATGATT	0.18692184503230824	-0.1469814935785937	wzxC	2117397
CTACGGTGACTTTGTAAGAC	-0.6736450208507273	-0.5715732995706859	pal	778584
CATCACCACCGCCGGGAATT	-0.1959307753642101	-0.25438312368998706	motB	1974034
TTCTACCAGGCGTAAGTCGT	0.2226080857623618	-0.06924372249567512	nikE	3616425
AGCGAGGCGCGATTGAGGAC	0.031947185055967615	-0.4515175475529785	phnL	4315852
GAAGGCTCTATCCTTGAAGC	0.4610598695465342	0.16668561161704032	yagL	292707
AAATGTCACCAGCCGGTCAT	0.0440200173565426	0.4957646913772456	galR	2975247
CACTTCAATCGCCTGATGAT	-0.13106668920154885	-0.1477655906641101	yddG	1544928
TCCAAAGGAAAAAGTATACC	-1.3185500620281658	-1.0403820552905108	yhaK	3252400
CCTGTTCGCGCTCAGCTTGC	-0.03181139560310342	-0.3085388937368925	cysN	2873187
ACTGAATGCGGCGGAATCAT	0.12712039699749456	-0.19960452218372826	agp	1065269
CCAGACGGAAGTGACTGCCC	0.09953606876640997	-0.13379687599680412	ykfF	264669
AATCCGTAGGGACGGATCGG	0.1036829386548821	0.22776148828467546	ykfC	272115
CCCAGAAAGCCAGATATTGT	-0.07001522588948705	0.23782076776051664	emrY	2480072
TAAGGGCTGCTCGGCGCATA	-0.2555402645023653	-0.3080522366093601	rffG	3971002
ACGTGTTGTACGAACTTGCC	0.7899743947500033	0.2169225952356022	mqsR	3166508
AGACAATGCGGCCTTTGCTC	-5.189371402929162	-5.202548198048677	infA	925481
ATATCGTGGCCGCGTGTGGC	-0.3020474311162377	-0.031440580310309274	cbpA	1062659
GATTGCGTTCGCGCCGAATT	-2.5925436798518264	-2.0968295541675745	eno	2905650
CAACGAGAGGTATCAATCCC	0.5848236015631574	0.08910155530741637	rfe	3966068
AGCTCACGATCCACCAGGGT	-0.4705531554732156	-0.962833415566404	sspA	3375262
TGCAGCCAGTTCACCGAGAC	0.3636683724370704	0.07173318738127478	lysP	2246352
GGTACAGAACGGAAAAAGAC	-0.5022620152005538	-0.2327713861189276	yeeT	2074897
CAGCGTCAGCCAGGCCGGAT	-0.18003801321731505	-0.2885781520060048	thiL	435100
CATGGTAGGCAATATAAAGC	-0.33304963172328084	-0.5196721976586565	tag	3711145
CTGGGCGGAAACATCAGCTT	0.12834853620581432	0.22751400650331746	mhpE	373433
ATGCCAGGCCGATGCCGCCC	-1.5994508886554732	-1.9359638145797635	fimG	4546490
TTCCGCCCCCCGGTACAGCT	-0.857576278582463	-1.3016111731458224	glnK	471950
TCTGCGCCAGCATATATGCT	0.6823987673653829	0.12747273463569295	elbB	3347912
CGACCGGTCGAACAATATAC	0.13793788074418134	-0.1878999712011773	mlaA	2462883
CCCCCTTTCGAACCAGAACA	0.4590575166353865	-0.14792266998713444	ydcA	1489771
CCAGTATTTGGCGGAATTTC	0.10019548602823967	0.02827343823644957	trmL	3779263
TTTAACCCATTTTACGAGTT	-0.8377621296614443	-0.049302576966814726	ygeK	2992915
CCAGCACTGCGCCTGCGTTC	0.35952184308447177	0.06997272951683753	uxaA	3240776
GTTTTCATGCGACATGTAGC	0.3774437510817344	0.027673427156717608	yehI	2199074
TGTTTTAGATATTGCCGGTC	-0.4042106606445198	0.19768049176298488	yeiB	2239860
TTTCAGCTGGTCGGTCGCGC	-5.298372180090535	-4.0934389649668015	atpF	3918733
ATCCCAGACATCAAAGTTTT	0.2604508804542736	0.2907211043993527	dkgA	3155361
GCGTCCACTGATTAAGTTGC	0.6768772081820102	0.3797708944851974	fliJ	2016222
CGGACGGAAAGACGAGTATC	0.37156718474506495	-0.13100070818470488	pck	3531225
TTTGTGGGTGAAGTGAGTAT	-0.6539992965691472	-0.1302016524783799	ahpC	638386
ATACCACGGCGCGGTGATTT	-2.294981590889761	-2.3075435883915247	dinG	833087
GCAACAGGTGCCATGAGTCC	-1.4108469093489484	-0.8959514856909376	rssA	1288886
CAGACATTCGGCGGTATCGC	0.1461182049752785	-0.29846386085555104	sbcC	414757
ATGCGACCAGCAAGCGTTGT	-6.170992873614308	-5.429554294698257	yejM	2282528
GGCTTCGGTGCAATGCATGC	0.16687676514207572	0.06888431374217374	thiK	1162697
GAATACCATCCAGTCCCCAC	-6.727940998165868	-5.935508920979625	secE	4175702
GCGTGGTGTGCAATGTTTCC	-5.9134966513219425	-5.501281977524298	secE	4175642
CATAAGGAGCGGTTAATTGC	0.1509352212730546	-0.02946110314264616	rsmF	1918406
TCTACAATGATAGAAAGCAT	-0.3100884832799697	-0.01683758628138965	ydfJ	1629424
CAGATTTGGACGCGGTGTCC	-0.14478299429145913	-0.1736093136507838	gstB	879165
GGTCGCGTTCCTTCAAAGGT	0.1353943703772762	0.0071302106787876065	casD	2879013
CAGGTCATTGGTGAAGAGCC	0.4966569094091146	0.17618435134630595	gatC	2172048
CTTTCCTACCCGGCTAGACA	0.3508495410700212	0.5200156110483418	Control	Control
GAGCCAGAGGTGGCATAAGT	-7.4705531554732145	-6.3317942460371945	dut	3812013
GAAATCTGTCGATAGAAAGT	-0.3512542271008716	-0.18429146668922414	yfaH	2347803
TATTAACTGAGAGCGGGTAC	-1.028548608594103	-0.23123316756944345	cbtA	2075838
GATCCAAAATCCGAAGATTT	-0.5123733311678427	-0.1194015538814588	cyoC	447811
CCAGAACCGCACCTGGGATC	0.2769048125106326	0.2717011967418605	ulaA	4418915
CATCGATGTAATCTTCTCAT	0.06477857752333982	-0.17845911582790208	ybcK	569119
GCGATCGATGGAGTTCCACA	0.026946503997600683	-0.4560960821507502	metF	4130758
TTCCCAGTGTCGGATCAACG	-0.4705531554732156	-0.721468730053745	ydgD	1670338
GTGAACCGCCAGAGCCGTAA	0.2824648439783564	-0.07463554664675431	yghZ	3146234
ATAACGTTGCCAGAAGAAGT	0.10899584906157612	0.04366087493040927	dcuC	654548
TAGAGTGTGAACCCCAGGTC	-0.4572563328597578	0.09604424790478516	gudD	2916406
AGTAGCCAGCGTGGTGATTC	0.0012703698972054145	-0.2707735128443425	ygcS	2895304
GCCTTGTAGATAGTTAAGAT	0.4410909701059371	-0.09191854294415623	gsk	499759
TTGGGTTTGATCACAATATT	-0.4859831960428218	0.0179619309402943	dmsB	943172
GATATCGCGATGGATAATCT	-0.5710800314271801	-0.19096929735571636	fbp	4453532
CAAAGCTTGCGCAGTGGTTC	0.23615461760030956	0.0026026459242329825	yfaD	2355023
TTCCTGCAGACGATCGGAAC	-0.3946043022399175	-0.3218204148422453	sppA	1847121
ATCCTTGAGATGCAGCTTCT	0.011723681273376307	0.10938688486677806	dacD	2080102
GTGGTGCTTACAATACCAAC	0.5294468445267841	0.3420119486118407	rluF	4228600
GGATCCACTGGGTGATACCC	-0.7586785422698401	-0.7098526743965331	rnhA	235775
GAACAAAATAGGGCGGATAT	-0.1937129501143916	-0.7691105322208585	sstT	3238202
CCATGGCATCGGATATTTAT	-0.5445537369169925	0.039451497736666015	fsr	503667
TCGGTGTCGTTTTCGCATAC	0.6884835298263605	0.05282994074836611	yfgG	2627326
GTAAAGCATCTAAACCTTCC	-2.1768219524165056	-2.144612632916023	tusC	3473298
TTCGACCAGCACATTTTTCC	-0.1577108893443322	-0.2193065559440529	yhhX	3578563
TGCCTCCAGGCGAGGTGCGC	0.22011878641905547	0.012397317274418285	rutD	1070519
ATTGTCTTGAGATCGTCCGT	-0.4306604283497033	0.21436658847083567	cbpA	1062956
GCAGTCCACGCGGTAAACAT	0.0463639578248416	-0.516830334976254	hycG	2842117
CGACCTTCAATCGGGAAGTT	-4.48178041089647	-4.654313730578623	ccmF	2292470
CGCTTTGTCGCTATCGAAAT	0.08483622986459327	-0.07668249260262773	yeaW	1883084
CTGCACGTAATCAAAATTCC	-3.7717226901937813	-5.463590618697674	smtA	973245
AAACAGCGGTAGCGTTTTGT	-3.7924812503605785	-3.8383598402655874	ypdA	2497331
GCGGCAGGCTTCAATGACCC	0.4256110335422445	0.4068563900070952	ynfO	1634896
GATTGCGCCCCAGCCGCACC	0.7686345084062103	0.06904225864234648	pabC	1152901
AGTGGTGGAAATGATGTACC	-0.0746244791420767	-0.500729078079149	mmuP	274656
GTGTGGACATGCCATGTTAT	0.2447783682085043	0.0004501454429719498	wcaB	2130269
GCTGCTTTTGCTTCTATGAG	0.2641022780057891	0.13871025194301456	yeeD	2082429
AGGATCTCGTCGCCTTCTCC	-0.28292615229744444	-0.038966203910666415	allD	545095
GAGTTCACAACCGCGATAAT	-0.11147206216838756	0.062171574236749676	ilvD	3951604
TAATCCCGCAACGGGGATAA	-0.7243097477189989	-0.16261031470152665	galU	1290712
GCTCATCACCGCTTTGCAAC	0.09212789787193397	-0.1985298889564694	ycgM	1227893
GGTTAAATCAGCTTTGTAAC	-0.5033430905908853	-0.05182845829601068	ssnA	3018277
AAGCAATGAAGGCCGACCTG	-0.6652005863267593	-0.2917249279258109	ydeP	1583600
TGTCTCTTCAACCAGTGAAA	-0.7924812503605783	-0.2115771638498044	yniC	1807652
CATCGCGTCACCGTGGTGTT	0.3921579915667535	0.2006490729860353	yciV	1321894
GTCCTTCGCCAGTGGGTGAG	0.17435188570422255	-0.07614202044109852	hyaA	1031577
AACGTTACGGAAGTCAAAAC	-1.1836720076850544	-0.6615154248834845	yajQ	443990
TTCAATTGCTGGACATCTCT	-0.11522190231863982	0.04055153213299545	ydaS	1418520
ACCGTTATAACACTCCCTGT	-0.12061068441625687	-0.08855900647583538	gadY	3662912
TCCTTTCAGACGCACAAAAC	-1.8272466685212545	-1.3889469774532812	dapF	3993027
CGCCCAGCATTTACCTAGGC	0.4760075855653239	0.16016039388109515	Control	Control
CTTGCGTGTGCGAAGTAATC	0.15747806713982615	-0.16525301739295128	galP	3086447
GATCGGTTGCCATTCTGCCC	-0.08289209512567708	-0.4209223102929175	rseC	2705432
CTGATTTAAGTAATATCTGC	-0.20751874963942207	-0.028746197146795938	Only	2276401
TTTATTTGACCGTTCAATTT	-1.4287329797785886	-0.024592929693749488	yliE	873278
TCGGTGCCAGCCCTTTTAAC	-5.792481250360577	-5.9114233024553124	lnt	689628
TCAAGGCCTGGATAAAGATA	-0.5881227518543919	-0.3413575189350211	fic	3489452
ACTTGCGATGGGGAGACAAT	-1.5294468445267844	-0.8250669381948739	frmB	377082
GTTCAACTTCCTGATCAACC	-5.5580159967235545	-5.396739497744751	ptsI	2532190
ACACTACTTGAACTATTGGC	0.4554462630830074	0.3729877140038873	yjgN	4478258
TCGGGTGAGGGTTTCCCAGT	0.06271611106644738	-0.0791374138810812	yhaV	3275781
AGGGTAGCGAGGCGAGGGAT	-3.3531962048350565	-1.9805870112217605	pcnB	158436
GCCGCGCCGGGTATGGCGAC	0.7075391668404953	-0.0011835999368028374	mdtL	3889843
ATTAAAGAGGGCGATAACGG	-0.32853415060078794	-0.005469826100845897	npr	3346218
TTCAGCGGGACGGGTAATCG	-0.3951009270437503	-0.3910010539288651	ghrA	1097939
ATATGTCAGGCAATGATTAT	-1.055515656194372	-0.1668777445133015	ais	2363170
ATCCCCCAATCACCGAGATC	-1.0408688802299708	-0.952789131752794	cyoE	446873
ATCTTCGGTCGGGAAGGCGC	-1.0136954804997451	-0.3402477534642303	yciK	1326526
AAGGGATACGCTAAACCTTT	-0.02156832427103428	0.07685561999386259	elfD	998146
GATTGATAACCCCAGATTTC	0.1430920999520251	-0.07011079452319846	dsdA	2477727
CACGGGCGATGCGAATAATC	-0.005667106743810546	0.08541888742312365	narG	1280638
AGCGGGATATGGGGATCTCT	-0.4705531554732159	-0.5839570240265186	yjhD	4504687
CACGCAGATAATCCGGTGAA	0.17386319545818307	-0.06227506878160216	yhbO	3297218
AAAAACAGGTAGATGGCAAT	-1.0230941785019945	-0.2956985479634675	nrfD	4288548
GAACCAGTGGCGCTACCGCT	-2.593172442137172	-2.9383556302423086	cmk	960985
ATTGGCAGAAGATCGTGTTT	-0.07354957902463344	-0.20318589359066352	yfcJ	2438120
CATCTCCAGCCATGCGCGAT	0.0440200173565426	-0.12703180598175934	sufB	1761843
TATTACCGGTAATGAAGATT	-1.028548608594103	-0.011930772035686266	wecB	3968648
ATGATTTCTGCATGTGCGGT	-1.2075187496394222	-0.8434375564072338	tadA	2695717
CAGGCACATACGGGCATCAC	-0.16770580215155814	-0.2722939436285242	pabC	1153241
AAATGTGGATGGAAATTACA	-0.2641022780057893	0.11796379203540575	moaB	817759
GTAGAGGTGAAGGCTACGCC	0.17330303430150915	-0.2782563268008497	ykfG	263857
TGTGGTGGATGATCTGATAT	-0.5658781144965257	-0.8221167612212829	abpB	2761059
GTTGGACCGTTAAGCAGAAT	0.3755341610731029	-0.04394397391548166	rtcR	3556918
CCCATTTTGATGCTCTGTTC	0.2315419788459381	-0.24455632801052415	ycjQ	1374005
CTGGTTTGCAATGCGTTGTC	0.4081405483046505	0.1477713727531036	yhcD	3361565
CGGATCCATCCAGCGTAAAC	0.4502766310931767	0.039700478266317514	hyi	535680
CTTCTTTCACCGCATTGGAC	-5.260630086098983	-6.026313222883261	valS	4481414
CATCGGGAAGGCGATATGCG	-1.1949187128597882	-1.806309711002115	glpD	3560269
CGAATAGATAACCTTAATAC	-0.5718364913103975	-0.31845436260197496	potD	1181901
ACCTGTGGTAATGGTGATGG	-0.4352200823609351	-0.3414535162096274	thrL	219
AAAACTCCGGCGAGGTGTCC	-0.6929455768096637	-0.2888430923959725	bioB	809026
AGGTGTCGTGAGTTTGCTGC	0.9379827778636728	0.5811299613430392	yigB	3995548
GATCGCGAAGGCCAGGAGTG	-0.2892233907586542	-0.6000484681811634	yobD	1902863
ATAACACCATCAATAATGTC	-0.3729423588467935	-0.10476773849964882	fetB	515999
ACGCACCACGCCTTCAGTAG	0.8584818259084066	0.2661159690706949	insA-7	4516585
ATTTGCGCCGGTGTCATTCC	-0.20412017317755693	0.09776436418481203	alkA	2144826
TGCCTCGCGCCAGCGTTCAT	0.4407179259324528	0.18000298920237134	glrR	2686440
TCACATCAACAACATATTGC	0.2008240970654136	-0.024664144621237668	ddpX	1560843
CGCCAGAATGGGCACCGTAC	0.8734012457441456	0.27642360698426405	kdgT	4099847
ATCCGGCCAGAAGTGCACAC	-4.34969876059883	-4.328782113644277	parE	3172928
TTTTGGTCAGAATGTGACGC	-6.238737480250141	-5.763193372112317	rpmI	1797937
GCATAAACAGAGCAACTAAC	0.3958222803965887	0.280996336774088	yajG	453368
GATCAGGAACGCCTGTTTGT	-0.2871070143772845	0.13086204487146325	ppc	4149848
GATTAGCTGGCGATACTCTT	0.2206087490798656	0.004664452930385865	mdtB	2154027
ATGGGGGGGGCCTGTTTCGC	-0.39578538707124333	-0.6964645473984947	gsiA	867626
TAACGCGCCGCCGCAAGGTC	0.053935486221625466	-0.20840743449058552	yqhC	3152663
GTCCTGGTGACGCTGCATGG	0.3379153868950968	-0.11015586500954523	yfaD	2355228
TCTGATCCGAACTTCGGATC	-5.225440657636684	-6.7314446363490745	rpsG	3472061
ATAAGACGAGGTCGCCGTGC	-0.9076169610820584	-0.36875641657099895	hycF	2842740
CGTGTACCGTCAGGTGGAAT	0.3088477050133869	0.03395052363278639	baeS	2161267
AGCAAGCAGGGAGGGATCCG	-0.05865536372493917	-0.1808544310174032	yegE	2142042
GTTAACCGGCTGTGGTTTGT	-0.7630040492837443	-0.9888492710455296	tolC	3176811
TGGATCTTGAATCCTCTTCT	-0.22497594671596846	-0.052394217894872634	yqeI	2986813
AATACGATTACCGTTGGCGT	-0.6404781569155283	0.06519163138503759	tehB	1500119
AGTAATTGAGGGTAACGGAT	-0.4705531554732156	0.03476285194303719	sxy	1020583
AGTTGATCCAGGCGAGGATC	-1.3848232814473318	-0.7813656841275004	ychF	1256894
TAGCTAATGGCGTCGAACAT	-0.21090933884019614	-0.3736339219587771	yhhN	3603910
TGAATTCATACCATGAGTCC	-1.2452608436309731	-0.3705046470432851	ydjI	1855516
CGTACAATGTTGAATAATAT	-0.6266723573904976	-0.5226636990897398	leuE	1878564
TTTATCCTCACGCACCTTAC	-0.3193890821395651	0.1589027923252142	yagK	291934
CACCTCGGTGATGGTGTTCC	-0.8664818318043549	-1.336333998678635	radA	4624024
TTTTACCGATGTTATATGGT	-0.6245867841456366	-0.011834408121748964	yhdJ	3409795
ACACCGCCAGCACGCCGTGC	0.19365609625767632	-0.2242001881258604	astD	1827357
TCACGCACGGTGTTGAACAC	-0.7949881059711528	-0.5174398624372076	sucD	763557
TCACCCAGGTTTGTGGAAAC	-0.019173809130651483	-0.2446502947629313	norW	2832156
GATGACGCGGAACAGGGATT	-2.450375273535585	-2.119382801874377	rbsA	3932331
CACATTCATTCTGGGCTTTA	0.12700938202757373	-0.08912570947546405	sufA	1762087
CAGGTCGATAACTTTGATAC	-3.5700888290241304	-4.189958801829293	atpD	3915010
CCGTGGATAACTTTGGCTTT	-0.2104903161707129	-0.2637203898950464	torI	2474441
CAGCGGTCGAGCTGCCGCGC	0.6418380820729777	-0.09189969773429507	hcaD	2670392
AGTGCCAGTACAGAAATTGC	0.11440934524794022	-0.03822490645706922	dmsC	943809
TACCGCCAGGCTAGTATGGC	0.3531962048350572	0.07533767405549119	ldtA	2061301
CCCTGTATTCTTGTTCAGCT	-0.12096871768298788	-0.15307194498827092	gnsA	1051358
TGAAATATCAGAATTAAGAA	-1.2548244644177786	-0.01683758628138965	rbsD	3931388
CAAGCATGGTTAATCGTTGT	-0.4891688336405625	-0.9730758207264174	sgrT	77457
CAGAGAGTAAATACGGCGAT	0.2315419788459381	-0.38117482738862574	yfbV	2410995
CGCCAGTAAAGCGATACGTT	0.5805210291210534	-0.02622265474838636	yfbR	2407057
TTTGTCGCGCTGTTCTTTGT	-0.3478339972200827	-0.2241256883152284	ydaW	1421299
CGCCCAACCCCTGTAGAAAT	-0.4840996873111638	-0.6795559804436979	mdtL	3889929
TTTCGCCTGGATCTGTGGAT	-0.9044496820033752	-0.516531936012724	yjbH	4236610
ATTGAAAAGGCCACGAAACT	-1.0388369150477412	0.06633808109942896	ynfM	1668186
GTCGGTATAGGCAAATAAGT	-0.01565119531643244	-0.20849922191329265	glgA	3565761
TTGATCTTTCAGGCAGTTAG	-1.1103775912288905	-0.7105497127194966	yceQ	1143838
GCCCAGCTCGAGCAGGGTAT	0.2769048125106326	-0.21341682222373212	acs	4285030
GAACTTCTTTATTCAATAGC	-1.6404781569155282	-1.3223446932619227	fimB	4539217
TCAACATATTTCTGATCGGC	-0.2650840371732364	0.3782201496051383	elaB	2378956
GTTCCAGTCAGCAGGCGCTC	-0.4705531554732156	-0.661276102518918	garD	3273962
AAATGTTGGGTAGTCCTGAT	-0.4705531554732159	-0.04471375341309836	ftnA	1987069
TTCGGTGATATCCAGGCGGC	-0.17554635990114198	-0.42680177535671215	narL	1274520
TAAAGCTTTATTGAAGGTAA	-1.0148736716970257	0.4244358402332795	ybdO	636034
TTATGGCGCGCTCGCGCTAC	-0.3383053571747761	-0.12493161435330324	yfbT	2409778
TTTCGCCAGTTCGGCGTAAG	-0.5752505341399091	-0.12386256532792672	asnC	3924956
GACAGAAATCCTGCCACCAG	0.6825261745311733	0.21984007861789626	ycdU	1095349
CAGTTTATTCATGGTCAATT	-1.892962643408412	-1.6961471699837047	hha	479375
TTGCTGGCATAGTGTGTCGA	-0.10168583762729756	0.013389201150470377	gutM	2826732
ATAACTGGGGACGCGCCCGC	-0.07462447914207647	-0.0073923609860329096	rutG	1068833
CATTCCCGCTAATACTGCAT	-0.2410713093504485	0.14442806117427345	adrA	403238
GAGGTTACAGCAATTAGCGT	-0.3450222733893569	-0.5068676101828709	gltF	3359466
TCAACGATCAATAGGGTTAA	-0.03759374819710959	0.10525005934469256	dpiA	653095
ACAACCGTTCGCATAGGTAT	0.1494157950758539	0.2255580661950811	speB	3081362
CGTCGCTAATGTCCCGTAAC	-0.6501025758039284	-0.554933033882858	yciF	1313448
AACGGGAATATCCATCATAC	-0.7701134373321237	-0.2903096524935941	yidL	3858656
CGCCCGCGACCGCTTTATTC	0.316368174329966	0.13613226586270954	yfeW	2546625
GTGGCAGGCAGAACATGCAA	-0.1156366486319429	-0.10575806414253464	ybcO	572459
TCCAGCAGAGTGAGGTAATG	-0.2800912230282088	0.3617060205183607	citG	646144
CCCAGTTCGCGCAGCACGTT	-2.659586979863233	-4.3711787220233544	glmM	3321519
GAAATCGTTGCCAGTAATCC	0.2664124386929905	0.07806352657987481	nlpD	2866369
CCATTCGATGGTTTTATAGC	-0.4705531554732156	0.1939614467922908	gstA	1712670
CCCGCGATAAAGACGTGAAT	0.3038871441116533	-0.01184809034855272	ulaD	4420759
CCACCACGCTAATCACGACC	0.21382026675235144	0.358193162726598	ilvL	3948372
TTCAATATGACGTAAGTTAA	-0.940038438774436	0.010114069117608926	lysR	2977051
TGTAATTGTGGGACAATAGT	0.0852629995884242	0.18836281724515855	ygcG	2903788
GCAGGAGAGCGTCAGCAAAA	0.2664124386929905	0.08522194591153642	nepI	3839485
TACACCATATAACAGACGCT	-0.6898661838776915	-2.53093131507334	ftsX	3599845
GTTTAGTTCGGCCCTGACTT	-0.2779080775308197	-0.26053352082606	yjhP	4530554
CCGGTACGGAGATGAATTTC	0.207518749639422	-0.10472220165558456	dcuB	4346147
CTTTAGGAACACGTTGCACC	-0.15429381067254566	-0.2807046855401667	slyD	3476295
GCACGGGTGATAAATGTCAA	-8.121604846652144	-5.988413041483517	mraZ	89744
GAGATTTTCCAGATACTCAC	-0.03445404066654234	0.18210323480344748	wcaE	2127532
GATTCATCAGCCAGTTAAAC	-0.3512542271008716	-0.7948733617303327	sdhE	3038931
CGGAAGCGCGGTAATACCTT	-0.2435880043469435	-0.40535634690593547	yfbT	2409873
TGCGTAAAGCCTGCACAGCC	0.551540615377401	0.0512858089089987	ydaG	1417421
ATCAGCCGGAGCCAGTGAAC	-0.7129139930422597	-0.6370623811589455	deoA	4616722
ACAGCACTATGACTGCCGCA	0.3041545326845416	0.08421053834016679	hokE	607077
ATGACGCCCTCACTGTTTTC	0.07321765792783097	0.10884636039837448	sbmC	2079052
ATAGCCGGAATAGGGACCAG	-0.14531232654501758	-0.06069224658299965	sanA	2231513
GATGACCGGCGCATGCAGGT	0.28969326252889904	0.21498198388897705	gatY	2175108
TGAGTGTCATCATCGTGATC	0.10860372356673452	0.004927622402273846	sspB	3374384
GCCGAGGTGGATAGTTTCTT	0.14579976439548692	-0.00816936420862735	kdgR	1907810
GCTTGCAGTACGGCTTTTCT	0.3161654738900901	0.21166344852575006	ompX	849879
CGCCGTGAATGCAGGATCAC	-5.5409424833646135	-5.223103417230832	yjjV	4611889
ATCGCCTGCAAGCGTAATAA	0.2962476682337536	0.027523485354106203	ymdB	1105237
TGAAGTAGATTTTTTTGTAC	-0.3281088904530105	0.22436557842116425	narH	1283508
CGAATGCCTTGCGGGTTTTC	-3.7924812503605785	-4.597852624369535	bisC	3714207
TTAGTCATCTTCACGCCTTC	-2.025142007150853	-2.0744347200769484	dsbA	4041649
GATCAGCGGGATGGAGTCCA	-0.1556798181198038	-0.14996912968800002	deoA	4616779
GCAGTGTCGAGCAGATAATC	-0.40849218734096415	-1.0444254339703047	guaD	3024311
GTCCGATAGCTGACAATCAC	0.5838946285491606	0.25617074284548425	folM	1679094
TCTTGATTTCAACCTATCAT	-0.5400940887262927	-0.3530747943387293	ybcV	578585
ATAACGCGACAGTTGTTAAT	-0.1922519929861114	-0.046161602485576436	marC	1616870
AGTTTCCAGGATTTCTCAAC	-1.2779080775308198	-0.17904319970141205	gpmA	786578
ACCTTCCTGATAATCCAGCT	0.06831293065848643	-0.28648197286369503	yohK	2229622
TTTCCTGCGCTACGCGCTGC	-3.7924812503605785	-2.6964645473984947	rbfA	3311177
ACTGCATCGGGCTTTTGTCC	-2.107983076088508	-1.9568634554554782	tusC	3473207
GCTGAGCAATGAATTGTACC	-0.09204153221948587	0.005735628607034915	yeiI	2249975
ATGCTTTTTTGCTCAGTGCG	-0.4705531554732156	-0.008013275581754131	idi	3031237
CAGGATCATGAATTGAGCAT	-0.04373848841801831	-0.13444202944122566	aroG	785033
ATTATGCAGTTGATAAAAGC	-1.2606300860989843	-0.2364317087116233	Only	3352158
GTCCATTGAGAACACACCAT	-0.4511878306062848	-0.38499705757821	kbl	3790033
GCAGGTGTGCCGCCTCAGTC	0.7981500004472701	0.3559389066539178	lysR	2977103
CATCAACATATTGCGTATTC	0.3508495410700212	0.1421225152726726	puuA	1358828
AATCTGCTGGTCATACATAC	-0.9153379981461118	-0.34918087823423805	flgJ	1136806
GGACAACCACAAAATGGACA	-0.18424897031657472	-0.0979156338556234	ralR	1411927
TGAAAACAGCAACCTCCGTC	0.15505132974528624	0.019719597621065118	mokC	16790
AGCGTTTCATGTCGGCAACC	-1.070015225889487	-0.8964129898779517	ybaO	467934
GGAAGTGAGTAGATAGTATT	0.15663758063723776	-0.11560553623696035	fumB	4345291
AAGGGTGCCGGAGCGTAAAC	-0.1288618057644233	-0.31418545687803434	astC	1829958
ATGGTGCCGGAGATCATAAT	0.16593964588802246	0.1613226302864732	metH	4222473
CCCAAAACCGACACCAATAT	-0.30365584672847146	0.10799440146743278	yfaZ	2362197
TTTACGCAGATGGAAGGTAT	-1.5163568450863405	-1.1893846798658494	dppA	3705457
GCTTTTGGTCGTACTTTTAC	-0.7089006824555397	-0.5895947072087264	mepH	1732650
CATTTACGTACGCGACTGTC	-0.27157212074682024	-0.04492975806103705	lpxP	2493965
CGCTCCATCAGATAGCGTTC	0.13118505799876726	0.00883091918816592	polB	65447
CCTACCCAGCCGGATTTTTC	0.6922973202088265	0.4617638843034262	sfmH	561704
TTTATTGCTACCGCCAATTC	-1.1247783186314857	0.24327183565903646	yjfJ	4409202
ACGGTTGGGGTATAAATAAC	-0.1922519929861114	-0.1255089046712179	maeA	1553390
AACAGTTACGCAGACGTAAG	-1.3158305606745735	-0.5064082529042299	ytjC	4632330
AGTATCGGCAAGGTTGAAGG	-7.198473610036415	-6.145220487064008	lspA	25611
ATTACAGTACGCGAGCAGTT	-0.6958454673154585	-0.4436051379675534	sdaA	1895480
TCAGCTCGGGTGACATACAC	0.15393770943457774	0.134875868072456	dhaK	1249965
CCATTGTTCAACAAAATAAT	-0.8382849399737027	-0.3658982731791719	azoR	1480817
ACCAGCAAAAGATAAATTCC	-0.06748829786044808	-0.14273000076681186	caiC	37606
TTATGATACGGGTACGATCC	-5.962406251802889	-3.84287532138808	yqiH	3187987
CTCGCTCATGCCAGGGTTAT	0.004355799783026804	-0.3279866559651149	hsdR	4583478
AAGGCCGACATCCATAGCGC	0.2664124386929905	0.2543973006542648	insN-1	269588
TCCATGGTGTCCATAAAGAA	-0.15258307415453676	0.2271684921822099	yqcC	2922018
CAGGGCGAAGAGGATAATCA	-0.15816883325672434	-0.018672008081828558	zraS	4200551
TCGTCAGGAAGTTCGCGAGC	0.8975979561747922	0.5049437573774986	rbsK	3935822
CGCGCGGGAAATTAAGTTAC	-0.03445404066654256	-0.3438143684844229	mgsA	1026093
TAAATGGCGGGAATGAGAGT	-1.5648805380213688	-1.1540926243635137	ppk	2621272
TACCAAACAGACCAATATAC	-0.7457880149125367	-0.5092249229028757	tolQ	774787
CTGCGGCGTGGCGGTAAGTG	-0.7677133452116359	-0.8034162652257307	entC	624518
TGTGCAGGGCGATCTAACGC	-1.1709928736143085	-1.0486908450762258	sbcB	2080847
CAATCAGCGTCAGCCACATC	0.00833082583025413	-0.2522947830972732	ssuC	993483
GCCGCCAAAGCGAACGTTAT	-0.363637951556704	-0.6242147793119159	usg	2433731
GTCAATTACGCTGATAATAT	-1.1918371274071522	-0.8820218975723302	tsr	4590765
TCATCCAGCAACAGCAATTC	-0.20973657488924055	-0.09358389466392024	modC	796216
GCGGGCGAGAACGTCCAGAA	0.009254599195865907	-0.2768300340095541	citD	649861
TATGGTTGGGTAGATACTGA	-0.3158305606745738	-0.2932721370835817	speE	136111
GAGCAGTTGCCGTAAGTTTC	0.4275672305075709	0.1336834348681819	hybO	3143485
GCCAGAGCTTCGTTGAACAT	-6.9941151115302285	-5.466391062878629	rpsB	190016
CTCTTCGCGGATAGATTCCG	0.03912121794370349	-0.1455143942005903	ydjG	1853664
AGTTACGCGGAGATAATCCC	-0.4900493310990127	0.03286215712405749	lomR_1	1425592
GGATTTGCCATACCAATCTG	-0.244418332450951	0.0020171283305217003	yoaF	1875469
GCCGATAAAGCGTTTAAATC	0.4509727865036994	0.10062203920528212	chbF	1816034
ATTGTTATAGTTTTCGACTT	-0.903512562749322	0.08532309539211448	yedD	2006062
CTTGCATCCAGGTCAAGATC	-0.13520454482353214	-0.1249657212909725	ybgD	751586
TATTTAAGGTCGGGCATTTC	-1.06845471190187	-0.19606416447847966	wcaC	2129624
GCTTACTAAGACTACCAGGG	-0.16799038545278455	-0.3672148010645	sibB	2151692
AGCAAATTCAGTGGTACTTT	0.3112666744772508	0.15089272490040484	eamA	1618999
GAAGCCGGGTGGATCAGTAC	-0.275296864074282	-0.3155593214146646	yhcA	3360513
CCTAAGCAGATGCCCAGCAC	-1.2876890983234053	-1.6634957890117257	hisH	2092773
ACGCCCTTGCTGATCTGTAC	0.5733901921143811	0.2951601695658497	mlaA	2462965
CGGTTTCGATCAGCGTTTTC	-3.4091526108090724	-3.774856897959429	lepB	2702981
TACTGGTGGGCGTCACGTTC	-2.0640776696977956	-1.5196098779492357	yphH	2681140
GATTGAGTAAGAGTGACTTC	0.04402001735654237	0.011358665923099087	csgC	1104269
GTTATGCCAGAGCGATTTTT	-0.1776172639255601	0.010777987693932012	opgD	1495143
GCGTCTGCGCCGCACGTAAC	0.1968715054399135	-0.12333574997350538	flgK	1137820
TCTGATAACCATAACGTTCC	-0.21031738299209524	-0.06643982262723347	yjbJ	4257389
GCACATTCCGGCAATACCAC	-3.2177870850932484	-4.829818103999784	ispA	439880
GCTCAGCATATAGTGAATGT	0.23828100341010905	-0.18418204809993946	yjgH	4471197
GAAGAAGTGCTCGATCATTT	0.3070544231903363	-0.21694998311786415	hisB	2092376
GGCAATCATCGAGTTGGAAT	0.22316766029458426	0.043204855586031383	ccmH	2290275
TAAAAGCGCGAATTCACTTC	-0.6107308135214761	0.0093761386438469	lsrG	1605153
TCAGCGTGTCGCTATCGTCC	0.6869881215132643	0.4226443478353077	ligB	3818567
ACCATTGATATTAACAAGTT	-0.7050184091102388	-0.08146998519097104	yfbO	2386680
GTGACACAGTGCGCGTACCT	0.4115211199640936	0.11636884956601268	yagB	279740
AGCGTGCAGCGCCTGCGGAT	-4.38941639274781	-3.845935711205993	hemE	4196257
TCCAGATGGACAGTCACATC	-0.21863478183359586	-0.01943464582101484	thiI	441209
TAAAACTGGCCTGCTGTTAT	-1.1709928736143078	-0.08614647240044426	gmm	2124021
AGACGCCGAGCATAAAGAGT	-0.5018040894576554	-0.04781095528626755	kch	1308096
AACGACGATGGAACGCATGC	-0.12188867811372585	0.2206890973511764	yniC	1807955
GTTGCCGTTTCACCTTCCTC	-0.40388211582792793	-0.9211100552086152	waaB	3801641
GCAGATATACACGGATGGAC	-2.4205124729736203	-2.722353251746295	clpX	456739
GCAGTCAGGATGGTCAGCAG	-3.857576278582463	-3.993638065743499	cydB	773091
GATGAAATGTTGGACGTAGC	-0.8290071263856922	-0.3976352356217503	yehK	2202129
ACATGTTATGCGTCGCCCAC	-0.12045438789469246	0.07792945334518088	phr	738850
GTTGAGCGCGCCGACATTTT	-5.731080705696435	-5.824914309200636	dxs	438842
TCCGCTTCGCAGGGTCTGCT	-0.4108469093489482	-0.16324602188139506	envY	585804
AAATCTGGCGCAGGGACAGC	-0.1564445650451527	-0.12872910475382338	yijO	4146293
GATTACCGGACCAAAAGATT	-0.2481607341367679	-0.19409921324832569	ybjE	913437
GGCGTCATCGACCACGAATC	0.5551640146351589	0.09018595040634604	mdtB	2154501
GGGATATTGCGGCCACTCAT	0.014873671697025912	0.09811893992597852	frvR	4087268
CGGTTCATTGCAGGCTTGCA	0.1751633763270366	-0.3284223180674406	metR	4010601
TCTGGTTTGCATGGCGTACC	0.22226533500860834	0.028541426383017043	ushA	504949
GACAGATAGGTGTTCAGAAT	0.12064129895945495	-0.3767103963784716	yccA	1030365
TAATCGGAAACTTCGGTTAC	-1.6721870166428665	-0.9845831175025476	purH	4205405
ATACGTCCATGTAGTCAACC	-6.644480087473023	-5.910309682144603	rpoB	4181212
TCTTTATTAGTGGAAGAATC	-0.3774437510817344	0.21161531135616585	ykgN	279442
AAAGACCAGCGCGACGTGGT	-2.654977726610644	-2.8747648318764627	glnP	846188
TATATTGTTTAAGGCATCTC	-1.4705531554732156	-0.08022384962102225	yfbN	2386165
ATGAAACCAAAACCTTTTTC	-0.7220919224691802	0.17248171938183932	cspI	1636649
TTCATGAAAAGGTTTCGTTC	-0.7029158655645921	-0.08344310801001488	yfdH	2466747
TCGCAGGCTGGAGATGACAC	-0.23060236275246315	-0.3049081654908907	ydhK	1720900
TCACTTCTGAGTTCGGCATG	-6.589494228196722	-5.946612730917611	rrfA	4038575
TTTCAACTCGCTGGTCACGT	-0.2810753566095029	-0.2614927109427254	fliP	2020411
TTCTTGAAGATAGTCTTCCC	-1.1065898407886412	-0.03283381561017551	intF	295893
ATGCCAGCGTGGTGGTGGTT	0.05723563686070654	-0.1328845322271972	rlmG	3233415
TTCGCGGTGCACCTGCGATT	0.2664124386929905	-0.12275457222464248	aroG	785356
AAATCTTACCGTTAGATGTT	-0.5613186193963982	0.2155780517637369	yigG	4001196
CTCAGTGGCTTAGCTCTTGA	0.35952184308447205	-0.05264956041235713	rydB	1762786
CATCCGCTGACACCGTTTCT	-0.20390749608704306	-0.395865945534368	narX	1276482
CGCCGGAGAGAAAGTGAGAT	-0.2310872207778263	-0.4911795197199424	yghO	3127660
TCCGTGATCGCAACCTTTCT	0.221686081566016	0.22018476743589946	paoA	301511
CATCAGATCAACAGTAAAAT	-3.0238067964670337	-2.1634885609336094	fimF	4545899
ATAGGATAACCAATTTTCTC	-0.7574343032613773	0.15150834045951744	dpiB	651795
GATTTCCCGGCGTTGATTTT	-0.7715554115060299	-0.30567923959765164	pinR	1431646
TAAGATGGCAACGTAATCGC	-0.5136218773651017	-0.13100070818470466	acrR	485557
CTGTCCAGGCGACGCCATGC	0.2459690494812177	-0.2070255707455354	sseA	2650593
GACGCTCAGTTCGGGCAAAT	-0.0364573203786871	-0.014987283439058087	phnI	4318604
AATAACGTCGAGGTCGTCGC	0.27035962320965323	-0.09932687659240892	uvrC	1991985
TACTGCTGGCAAAGTAAATC	-1.6868710623999792	-1.4978636133876768	yijO	4146278
ATTTTGGTGGCTTGCTTAGC	-1.5748898152879514	-0.7793781846840877	tusE	1029615
CTTGTTCTGGCACCAGGCTC	0.18345098967759174	-0.19593461793855627	rimO	876881
CCATAGTGCACTGTTACCAC	0.2941153674828381	0.18207103574215044	yobB	1923994
CCCGGCAGCGGTTCAAATAC	-0.42903388603494896	-0.29050497090663063	prmA	3407207
GTGTGCGTCACCGATGTTGT	0.2301283213682141	0.06825113618498846	ompA	1018780
GGCCAGCGAAAGCGCCTTTT	0.5901427762143381	0.18760702841104626	ytfT	4450628
TCAACTGCCAGTACCACGCC	-1.229545055969421	-0.9777326475030772	dsrB	2022793
ATTCCCTGGCGATAACAGTC	-0.6243584915522513	-0.35325054254328525	yjhF	4519564
TAATATCTATGCAAAACAGC	-0.6929455768096637	-0.1610231912841562	xapA	2522871
CGCTACGTACGGGTCAGCAT	0.2634192943810072	0.09768743545713	yciI	1308663
ACTGTTCACGGGCCTGAGAC	-0.2629577360648482	-0.15817615867309798	yeeP	2069077
GCCGCGCTGGTCCATTTTTG	-0.20578993572267112	-0.33036121349307834	fepE	617661
TTTTTTAAAGGCGTCTTCGC	-1.1335181681956452	0.02325044966674561	yggM	3096983
GTCTGAAATTCGTTCGCTTT	0.19181384893354705	0.09620208336699497	napD	2300992
CTCATTACCAATGATTCTAT	-0.9927799008464092	-0.468274674366668	bioD	811770
AGGAGCCAGGGTTACCATAC	-0.3147584828657917	-0.18047385494859747	chiA	3467015
GCTTCAGGAGCTGGTGCGGC	-0.3475422653678725	-0.537545895770492	yiiG	4085140
TGCGGTAACCGCATTTTGAT	-0.5024960479759699	-1.3238305456894828	yfgM	2637136
CGAAGGAAAGCGCCCGCAGG	-1.7754077370016366	-1.7050969724080758	ybgE	773577
AGGAATCCAGGTTGCCAACT	-3.4705531554732154	-3.622199372640654	rpoH	3598771
ATAATGACGCAAGAGGCGAC	-0.8855906547520597	-0.1258855874516578	dcuD	3373486
CAGAACTTGATCGAGAACGC	-0.13934724699784296	-0.020270110200761412	yqhD	3153508
ATGACGATCTCACCATATTT	-0.1361341164026566	-0.1897026642270417	hycH	2841237
CAGTGGCGTTTTCAGACTAT	-0.14862506058585326	-0.06423169597200372	phoQ	1188170
CCATCTGGCATACCGGGAAT	-0.08526299958842397	-0.2804074584540106	yeiW	2263260
CCATAATGCGGGCTGTTGCC	0.2474114767629345	-0.014470603310521081	insA-4	1049254
GTGGTAACGGCGATTGTATG	0.1275847339956735	-0.1213602109627676	ygeO	2994095
AGCGTTTGCTGGGTACGTTC	-1.7040432856929943	-1.8835173058854269	nagC	700463
AGACCTTGCGGGAATTCAAC	-5.055515656194372	-3.9257160193232177	hemC	3988531
GTATGCCAGTTGTCGTTATC	0.4769794246326486	0.4136572410989736	tauD	387296
ATCTAACGCCAGCAGTTTCC	0.026946503997601123	0.05812751591575437	hlyE	1229181
TGAACAGCGGCAGGACCTTT	-0.3288920062496248	-0.4130458533854903	cspI	1636514
GCGGGCACGGACGCCGTTAC	0.582776346932911	-0.057851525432435325	eutQ	2572866
TAGAAACAAAGTGCATGTTC	-1.9730534960023989	-2.495845973407441	pgi	4232306
GCCGCGCTGAAAGAATGAAC	0.1441566886419925	-0.3096032206320022	ygbL	2861671
GCCGCAGCGACGCAGGGCGC	0.5125730259623882	-0.2238711496789627	ycjS	1375329
CGATTTTTTTACCGCGGAAC	-6.42474946586009	-5.456930733629564	ftsY	3601616
CCGCCCGCCGGAAGCCATAC	0.43787960494370815	0.07141015412019547	fsr	503505
CACGCCAGAAACCTGACCAT	0.6314677814672929	0.2454317925206373	elfA	997288
CGTATCCAGCGTTACGGTTG	0.2060980749397947	-0.13363539818176362	yqfB	3041470
GCCGCCTGCGAAATTGTAGC	0.7915034834367479	0.12264938459320485	ypjF	2775488
TGCTAAGTTGCTGTAACACC	0.3312207343210887	0.14012938342323156	dgoR	3872704
GCTTTCTTATGGTGGCGCGG	-0.5445537369169927	-0.7998422872438031	yaaX	5460
ACCCACGCGCGCCGCAAGAC	0.059267791055479524	-0.31516261560753145	yaaJ	7760
GCGTCGTGTTGAAATAGGTC	1.8711381942355765	0.038720491107091526	argG	3316947
AAAGACCAGCCCCAAGCGAT	0.12734840095543865	0.044132724581577916	mdtO	4300734
CTGTTGAGAGTGATGTCCAC	-0.05160060619098883	0.0021619457272159526	tamB	4443015
CTGCCGCACACCGCGTCTTC	0.5266697598562105	-0.02045856933320289	ycaP	956104
ACGTACGGCGGCAGTGTGGT	0.20649953727566905	-0.2865963408562153	panB	149402
GATTGGTGTCGTAAAAATAG	-0.3674596625091122	-0.20359783716388732	paoB	300752
CCGTGTAAGGGAGATTACAC	-0.10216574949319313	-0.11637867381985954	cyaR	2165192
AGCCCGGGTAACCAGCGTAC	-0.5514731508567834	-0.2239690705829284	yciW	1347570
TCATCAGGAAGTCAAACTCC	0.2298865626678765	0.2980087327326586	yjcS	4303781
CATAGAAATCCGCCATTAAG	-0.36012916577956544	-0.05104267144452823	cynR	357591
GGCGTCGCGCGGAAGATGAT	-6.269294947226112	-5.578492713510476	ileS	23625
CAGGCGGCGTGCCGACTTAT	0.29962421771484804	-0.2687035404990085	malT	3551814
CTTTTGTCTCGGTACGACGC	-1.0894629881177096	-0.8310278151286792	yfcD	2417037
CTGTTGCTGATTTTGTGGCT	-1.3285341506007882	-1.3409603714292702	damX	3514709
AGATTTTTTAACGGAAGAAG	-2.7335875613070098	-0.3042259008658097	mepH	1732677
CTCATCAGAAGGAAGCGTCT	-0.2807285965931984	-0.5003146164008642	glnE	3196486
ACGTTCAGAGAGGTCGTACA	0.12554990285314105	-0.2745915618135545	gadA	3664429
TTGCAGGGTGGAGTAGTTAT	-0.1916937824777395	-0.30521853544528066	ygbM	2862368
TGATCCCATACCTGCGATAC	-0.8232247737916859	-0.7099873282677811	manY	1901150
TGAGGGATCAAGATGAAAAT	0.2606300860989843	0.5064292124305871	barA	2913375
GGCGTGAAACAGAAAATCGC	-4.586030372893152	-3.761397858450704	parE	3172888
CAGTAAAGATATGACGGTGT	-7.212020141874362	-5.202548198048677	dnaB	4262526
GCATTCGGTCGCGTACTCAT	-0.015136194678532666	-0.06351098415877021	ymjA	1355652
[truncated: 18,924 more rows]
