# Supplementary material for: Lipoprotein DolP supports proper folding of BamA in the bacterial outer membrane promoting fitness upon envelope stress
Source: eLife. 2021 Apr 13;10:e67817. doi: 10.7554/eLife.67817 (PMC8081527; doi:10.7554/eLife.67817)
Supplement: Supplementary file 1. [file elife-67817-supp1.docx]

**Supplementary file 1**:List of strains used in this study

| **Name** | **Genotype and relevant features** | **Source** |
| --- | --- | --- |
| BW25113 | (araD-araB)567 (rhaD-rhaB)568 lacZ4787(::*rrnB-3*) hsdR514 rph-1 (wild-type reference) | (Grenier et al., 2014) |
| *rseA* | BW25113 rseA::kan | This study |
| *dolP* | BW25113 dolP::kan | This study |
| *bamB* | BW25113 bamB::kan | This study |
| *bamB* *dolP* | BW25113 *bamB* dolP::kan | This study |
| dolP rseA | BW25113 dolP rseA::kan | This study |
| skp | BW25113 skp::kan | This study |
| dolP skp | BW25113 dolP skp::kan | This study |
| degP | BW25113 degP::kan | This study |
| dolP degP | BW25113 dolP degP::kan | This study |
| dolP-gfp | BW25113 dolP-gfp | This study |
| surA | BW25113 surA::kan | This study |
| ompA | BW25113 ompA::kan | This study |
| surA dolP-gfp | BW25113 surA::kan dolP-gfp | This study |
| bamB dolP-gfp | BW25113 bamB::kan dolP-gfp | This study |
| ompA dolP-gfp | BW25113 ompA::kan dolP-gfp | This study |
| ompC dolP-gfp | BW25113 ompC::kan dolP-gfp | This study |
| dolP  bamD-mCherry | BW25113 dolP bamD-mCherry | This study |
| bamD-mCherry | BW25113 bamD-mCherry | This study |
| *dolP-gfp*  nlpD-mCherry | BW25113 *dolP-gfp* nlpD-mCherry | This study |
| surA *dolP-gfp*  nlpD-mCherry | BW25113 *dolP-gfp* nlpD-mCherry surA::kan | This study |
| *dolP-gfp*  zipA-mCherry | BW25113 *dolP-gfp* zipA-mCherry | This study |
| JCM166 | MC4100 *arar/-* (*λatt-lom*)::*bla* P*BADyaeT araC* *yaeT* (BamA depletion strain) | (Wu et al., 2005) |
| LC-E75 | F– λ– *ilvG*– *rfb-50* *rph-1* *186attB*::P*tet-dcas9*, *attB::mCherry* | (Cui et al., 2018) |
| LC-E75 *dolP* | LC-E75 *dolP::kan* | This study |
